# Supplementary material
Source: publisher figshare collection journal article supplement (https://gsajournals.figshare.com/ndownloader/files/17573609)
Supplement: Supplementary file 1 [file 17573609]

## Sheet: Primer list
Gene name	Primer sequence
frq	Forward Primer 5'-TAGTTCGATGGAGGACGTCTC-3' Reverse Primer 5'-CGGTACCTGATTTCCTGACAC-3'
28s rRNA	Forward Primer 5'-GATGCTGGCGTAATGGTCATC-3' Reverse Primer 5'-TCGATGATGCGCCGAAGCTC-3'
prp5	Forward Primer 5'-GAAGACGCTCCTGCAGAAGAT-3' Reverse Primer 5'-GTGACACAATGGCAGATACAG-3'
wc-1	Forward Primer 5'-AGGACCTCGAACTCAACG-3' Reverse Primer 5'-GCTTTCTCTATCGTCCTC-3'
wc-2	Forward Primer 5'-GAACACATTCTGGATGCC-3' Reverse Primer 5'-CGCATGACCAACAGTCTC-3'
NCU09649	Forward Primer 5'-GACATGGTGTGGACCATTGCCAG-3' Reverse Primer 5'-CTGGCATGTGGTCTTGAAGACGAG-3'
actin	Forward Primer 5'-GATCTTACCGACTACCTCATG-3' Reverse Primer 5'-GAAGCTCGTAGGACTTCTCGA-3'
U1-3	Forward Primer 5'-TGGTTGACTGCGCGGAGATC-3' Reverse Primer 5'-GGACAATTCATGACGGCTA-3'
snp1	Forward Primer 5'-GCAGACTGGCAGCAACATGGA-3' Reverse Primer 5'-GATGAGTCGTCGTGATCTCTG-3'
prp39	Forward Primer 5'-CCAATGCTGAGCTTGAGGAAC-3' Reverse Primer 5'-TAGTTCAGGTACACCTGACAC-3'
snu71	Forward Primer 5'-TCACCGATACCAAGGCTATGT-3' Reverse Primer 5'-GAGGTAATCCCACTTGACGTC-3'
snu114	Forward Primer 5'-GACAGCATTCATGGATATGT-3' Reverse Primer 5'-GGATGTGAATGTCTGTGTAC-3'
brr2	Forward Primer 5'-GTATCCTCGAGATCGTGACGT-3' Reverse Primer 5'-AATGCGACGCAGAATGACTTC-3'
prp8	Forward Primer 5'-CATGCTGTGCTGAAGCTGCTC-3' Reverse Primer 5'-CGTTGACGTGATAGAGAACCT-3'
prp46	Forward Primer 5'-GCCACAACTACAGATGCCTCT-3' Reverse Primer 5'-GGTCTGGACGTCGCTGTACTC-3'
snu13	Forward Primer 5'-GCTCGGTCATTGCCGTCTCTC-3' Reverse Primer 5'-CGAGACGCTCAACCTTGTCAC-3'
prp3	Forward Primer 5'-GCCGTATCGACTGGACCGAGA-3' Reverse Primer 5'-TTCAACATGCCTTGCTCATCC-3'
snu66	Forward Primer 5'-GTATCCAGCGTGAGCGTGATC-3' Reverse Primer 5'-ATGACGCGTGCCTGATGCTGT-3'
luc7	Forward Primer 5'-AGTACATTGACGAGTGCAAC-3' Reverse Primer 5'-GTCCGAGATGGCCTTGAGCAAC-3'
snu23	Forward Primer 5'-CACTGAAGGCCAAGACCGACT-3' Reverse Primer 5'-CATAGCAGCCATCATATCATC-3'
syf1	Forward Primer 5'-CTGCTGGAGGAGCACAAGTAC-3' Reverse Primer 5'-GGTAGCTGAAGAGATCGAGAC-3'
isy1	Forward Primer 5'-CCATTGGAGACGAGAGATGAT-3' Reverse Primer 5'-CCTCATACGCCAACAGCTTCT-3'
yhc1	Forward Primer 5'-AGCTCGCGGAATGCCTCCAAT-3' Reverse Primer 5'-GTACGCCAGGTATACCAGCAG-3'
prmt5	Forward Primer 5'-TGTCCAACCGCGTCGTCAGCGAC-3' Reverse Primer 5'-GGAGCCGTACATGCTGCCGCTGC-3'
U1-1	Forward Primer 5'-GAAAACCGCGTAGTACGGTGGT-3' Reverse Primer 5'-AAGGGCAATTCACGGCGGCG-3'
U1-2	Forward Primer 5'-AAACCGCGTAGTACGGTGGA-3' Reverse Primer 5'-CCGAAGGGCAATTCACGAT-3'
U1-3	Forward Primer 5'-TGGTTGACTGCGCGGAGATC-3' Reverse Primer 5'-GGACAATTCATGACGGCTA-3'
U1-5	Forward Primer 5'-GATCAAGAACACCGCGTAGTAT-3' Reverse Primer 5'-AGGACAATTCATGGCGGCTG-3'
U2-1	Forward Primer 5'-CTGAAAGTACTCTACGGAGTAC-3' Reverse Primer 5'-AAGGTAATCATAGGCAAGCCT-3'
U4-1	Forward Primer 5'-GCAGGGGTTTTACGCGTATCAG-3' Reverse Primer 5'-CCAAAAATTCCCCAGCCAGCCGAA-3'
U4-2	Forward Primer 5'-GCTCTCTTTGCCTTACGGCTTAG-3' Reverse Primer 5'-ACCATGAGCAAGCCCAGAGGGTC-3'
U5	Forward Primer 5'-CTGGAGTGGGCCTGCTCATACG-3' Reverse Primer 5'-ATTCTGGATGTCCAGATGGGTTC-3'
U6-2	Forward Primer 5'-ATGTGATGCTAATAAAACCAAC-3' Reverse Primer 5'-GTCGAGTCTCTTTGAGTAGC-3'
hph	Forward Primer 5'-GCTGATCAAGCTATGACCATGATTACG-3' Reverse Primer 5'-GTCTCGAGCACTCTTTGCTGCTTGGACA-3'

## Sheet: Supplemental RNA-seq protocol
Supplemental protocol for RNA-seq analysis The duplicate RNA samples from WT grown in constant darkness for 12 hrs (DD12) and 20 hrs (DD20) were used to generate the mRNA-seq library using the standard Illumina protocol, respectively. And the sequencing was conducted on an Illumina HiSeqTM 2000 at Beijing Genome Institute (BGI). The transcripts were mapped and reconstituted by using Tophat and Cu…

## Sheet: Spplemental Table 1
Supplemental Table 1
Alternative Splicing events comparison between DD12/DD20
Event name	Event type	Isoform X/Total in DD12	95% lower confidence limit in DD12	95% higher confidence limit in DD12	Isoform X/Total in DD20	95% lower confidence limit in DD20	95% higher confidence limit in DD20	∆ Isoform X/Total in DD12 vs. DD20	Bayes factor
Supercontig_12.2:2481790:2481978|2481946:+@Supercontig_12.2:2482008:2482877:+	5'SS	0	0	0	0	0	0	0	0
Supercontig_12.2:4317187:4317697|4317667:+@Supercontig_12.2:4317844:4318036:+	5'SS	0.09	0.03	0.22	0.05	0	0.15	0.04	0.19
Supercontig_12.2:2089762:2089556|2089068:-@Supercontig_12.2:2088935:2089047:-	5'SS	0.04	0.03	0.04	0.08	0.07	0.08	-0.04	1000000000000
Supercontig_12.2:2192569:2191932|2191898:-@Supercontig_12.2:2190292:2191848:-	5'SS	0.01	0	0.02	0	0	0.01	0.01	0
Supercontig_12.2:3360896:3361181|3361140:+@Supercontig_12.2:3361236:3362587:+	5'SS	0.03	0.01	0.06	0.01	0	0.02	0.02	0.18
Supercontig_12.2:4178202:4178308|4178304:+@Supercontig_12.2:4178360:4178428:+	5'SS	0.23	0.23	0.23	0.27	0.26	0.27	-0.04	1000000000000
Supercontig_12.2:4381858:4384773|4384736:+@Supercontig_12.2:4384863:4385637:+	5'SS	0.08	0.04	0.12	0.05	0.02	0.08	0.03	0.12
Supercontig_12.2:3301459:3301296|3301175:-@Supercontig_12.2:3300528:3300691:-	5'SS	0.81	0.74	0.87	0.8	0.74	0.85	0.01	0.11
Supercontig_12.2:2084663:2084416|2084264:-@Supercontig_12.2:2083141:2084160:-	5'SS	0.09	0.05	0.14	0.01	0	0.03	0.08	718.11
Supercontig_12.2:3593085:3593372|3593368:+@Supercontig_12.2:3593432:3594776:+	5'SS	0.01	0	0.03	0.03	0.01	0.06	-0.02	0.1
Supercontig_12.2:89062:89845|89825:+@Supercontig_12.2:90053:91982:+	5'SS	0	0	0.01	0.01	0	0.01	-0.01	0
Supercontig_12.2:1791808:1791332|1791328:-@Supercontig_12.2:1790898:1791260:-	5'SS	0.04	0.01	0.11	0.06	0.02	0.16	-0.02	0.11
Supercontig_12.2:1654419:1654047|1653932:-@Supercontig_12.2:1651428:1653855:-	5'SS	0.01	0	0.02	0.02	0.01	0.03	-0.01	0.05
Supercontig_12.2:3026505:3022794|3022665:-@Supercontig_12.2:3021363:3022596:-	5'SS	0.88	0.8	0.95	0.77	0.67	0.86	0.11	0.79
Supercontig_12.2:960241:961960|961954:+@Supercontig_12.2:962012:963452:+	5'SS	0.2	0.14	0.27	0.25	0.19	0.31	-0.05	0.19
Supercontig_12.2:174719:174988|174837:+@Supercontig_12.2:175061:177214:+	5'SS	0.1	0.08	0.11	0.11	0.09	0.12	-0.01	0.04
Supercontig_12.2:1779521:1779747|1779728:+@Supercontig_12.2:1779800:1780382:+	5'SS	0.02	0	0.06	0.05	0.02	0.09	-0.03	0.1
Supercontig_12.2:511595:511544|511418:-@Supercontig_12.2:511179:511308:-	5'SS	0.65	0.18	0.95	0.83	0.59	0.98	-0.18	0.63
Supercontig_12.7:1767138:1766540|1766490:-@Supercontig_12.7:1765151:1766109:-	5'SS	0.07	0.06	0.07	0.19	0.18	0.2	-0.12	1000000000000
Supercontig_12.7:425321:425933|425929:+@Supercontig_12.7:426007:426973:+	5'SS	0	0	0	0	0	0	0	0
Supercontig_12.7:3908479:3908984|3908716:+@Supercontig_12.7:3909153:3909279:+	5'SS	0.01	0.01	0.01	0	0	0.01	0.01	0
Supercontig_12.7:1446175:1447675|1447538:+@Supercontig_12.7:1447729:1449276:+	5'SS	0.07	0.04	0.1	0.06	0.04	0.09	0.01	0.05
Supercontig_12.7:2907757:2907876|2907774:+@Supercontig_12.7:2907968:2908134:+	5'SS	0	0	0	0	0	0.01	0	0
Supercontig_12.7:3254472:3254676|3254672:+@Supercontig_12.7:3254736:3256189:+	5'SS	0.02	0	0.05	0.01	0	0.03	0.01	0.04
Supercontig_12.7:1963840:1963673|1963661:-@Supercontig_12.7:1962715:1963600:-	5'SS	0.46	0.4	0.52	0.43	0.38	0.48	0.03	0.13
Supercontig_12.7:1766109:1765151|1765147:-@Supercontig_12.7:1764715:1765085:-	5'SS	0.02	0.02	0.02	0	0	0	0.02	1000000000000
Supercontig_12.7:2132769:2133216|2133137:+@Supercontig_12.7:2133267:2135113:+	5'SS	0.02	0.01	0.03	0.01	0	0.01	0.01	0.09
Supercontig_12.7:3892343:3892497|3892493:+@Supercontig_12.7:3892565:3894015:+	5'SS	0	0	0	0	0	0	0	0
Supercontig_12.7:1464653:1464929|1464925:+@Supercontig_12.7:1464992:1465094:+	5'SS	0.01	0.01	0.01	0.01	0	0.01	0	0
Supercontig_12.7:2561418:2560803|2560799:-@Supercontig_12.7:2559619:2560698:-	5'SS	0	0	0.01	0.01	0	0.02	-0.01	0
Supercontig_12.7:1766702:1766540|1766490:-@Supercontig_12.7:1765151:1766109:-	5'SS	0.05	0.05	0.05	0.13	0.13	0.14	-0.08	1000000000000
Supercontig_12.7:1892860:1894478|1894135:+@Supercontig_12.7:1894581:1894901:+	5'SS	0.01	0.01	0.01	0.02	0.01	0.02	-0.01	0
Supercontig_12.7:2661871:2659658|2659612:-@Supercontig_12.7:2659104:2659551:-	5'SS	0.11	0.09	0.14	0.11	0.09	0.14	0	0.05
Supercontig_12.7:1982883:1982986|1982941:+@Supercontig_12.7:1983038:1983114:+	5'SS	0.86	0.73	0.95	0.89	0.79	0.96	-0.03	0.18
Supercontig_12.7:1432713:1431519|1431445:-@Supercontig_12.7:1429111:1431411:-	5'SS	0.01	0	0.03	0	0	0.01	0.01	0
Supercontig_12.7:2693283:2693393|2693382:+@Supercontig_12.7:2693449:2693630:+	5'SS	0.05	0	0.14	0.03	0	0.09	0.02	0.08
Supercontig_12.7:685916:685631|685556:-@Supercontig_12.7:685347:685493:-	5'SS	0	0	0	0.01	0.01	0.01	-0.01	1000000000000
Supercontig_12.7:685916:685631|685556:-@Supercontig_12.7:684215:685248:-	5'SS	0.02	0.02	0.03	0.2	0.18	0.22	-0.18	1000000000000
Supercontig_12.7:3978882:3978746|3978638:-@Supercontig_12.7:3978095:3978527:-	5'SS	0.15	0.11	0.18	0.14	0.11	0.17	0.01	0.06
Supercontig_12.7:1377790:1378166|1378162:+@Supercontig_12.7:1378229:1379572:+	5'SS	0	0	0	0	0	0	0	0
Supercontig_12.7:1892860:1894496|1894135:+@Supercontig_12.7:1894581:1894901:+	5'SS	0.01	0.01	0.01	0.02	0.01	0.02	-0.01	0
Supercontig_12.7:3121921:3122119|3122114:+@Supercontig_12.7:3122175:3124264:+	5'SS	0.77	0.45	0.96	0.28	0.18	0.38	0.49	13.39
Supercontig_12.7:1152602:1153295|1153191:+@Supercontig_12.7:1153369:1154951:+	5'SS	0.08	0.05	0.12	0.07	0.05	0.1	0.01	0.06
Supercontig_12.6:892594:893174|893102:+@Supercontig_12.6:893262:894131:+	5'SS	0.19	0.13	0.27	0.27	0.2	0.35	-0.08	0.44
Supercontig_12.6:3362030:3363927|3363669:+@Supercontig_12.6:3364002:3364815:+	5'SS	0.78	0.74	0.81	0.54	0.48	0.61	0.24	1000000000000
Supercontig_12.6:2360937:2360228|2360118:-@Supercontig_12.6:2359425:2360054:-	5'SS	0.03	0.01	0.06	0.04	0.02	0.06	-0.01	0.05
Supercontig_12.6:866062:863908|863862:-@Supercontig_12.6:862886:863849:-	5'SS	0	0	0.01	0	0	0.01	0	0
Supercontig_12.6:749308:751387|751321:+@Supercontig_12.6:751405:751764:+	5'SS	0.01	0	0.02	0.01	0	0.02	0	0
Supercontig_12.6:571949:573236|573215:+@Supercontig_12.6:573310:573935:+	5'SS	0.13	0.04	0.27	0.16	0.06	0.27	-0.03	0.23
Supercontig_12.6:4021751:4021659|4021641:-@Supercontig_12.6:4020776:4021578:-	5'SS	0.05	0.02	0.12	0.04	0.01	0.08	0.01	0.07
Supercontig_12.6:1498507:1498866|1498860:+@Supercontig_12.6:1498933:1500002:+	5'SS	0.73	0.62	0.83	0.59	0.47	0.7	0.14	1.14
Supercontig_12.6:2358018:2357879|2357520:-@Supercontig_12.6:2357396:2357500:-	5'SS	0.01	0.01	0.01	0.01	0.01	0.01	0	0
Supercontig_12.6:2526128:2525963|2525916:-@Supercontig_12.6:2525545:2525779:-	5'SS	0	0	0	0	0	0	0	0
Supercontig_12.6:3172622:3172409|3172347:-@Supercontig_12.6:3171963:3172122:-	5'SS	0	0	0	0.01	0	0.01	-0.01	0
Supercontig_12.6:538723:538576|538553:-@Supercontig_12.6:536437:538469:-	5'SS	0	0	0	0	0	0	0	0
Supercontig_12.6:1033271:1033579|1033555:+@Supercontig_12.6:1033626:1034760:+	5'SS	0.01	0	0.03	0	0	0.02	0.01	0.04
Supercontig_12.6:2360937:2360228|2360158:-@Supercontig_12.6:2359425:2360054:-	5'SS	0.02	0	0.04	0.03	0.02	0.06	-0.01	0.08
Supercontig_12.4:1560845:1561351|1561277:+@Supercontig_12.4:1561450:1563023:+	5'SS	0.04	0.02	0.07	0	0	0.01	0.04	8
Supercontig_12.4:4392625:4392829|4392727:+@Supercontig_12.4:4392884:4393891:+	5'SS	0.03	0	0.08	0.03	0	0.11	0	0.08
Supercontig_12.4:2061118:2061711|2061348:+@Supercontig_12.4:2061805:2062076:+	5'SS	0.05	0.04	0.06	0.04	0.03	0.05	0.01	0
Supercontig_12.4:4534989:4534209|4534205:-@Supercontig_12.4:4532625:4534141:-	5'SS	0	0	0	0	0	0	0	0
Supercontig_12.4:4785023:4785265|4785261:+@Supercontig_12.4:4785347:4787101:+	5'SS	0.01	0	0.02	0.02	0.01	0.03	-0.01	0.04
Supercontig_12.4:2219571:2220065|2219959:+@Supercontig_12.4:2220316:2222094:+	5'SS	0	0	0.01	0	0	0.01	0	0
Supercontig_12.4:4674868:4673967|4673963:-@Supercontig_12.4:4673483:4673907:-	5'SS	0.1	0.01	0.38	0.04	0	0.11	0.06	0.19
Supercontig_12.4:1221904:1220788|1220784:-@Supercontig_12.4:1219620:1220729:-	5'SS	0	0	0	0	0	0	0	0
Supercontig_12.4:5367494:5366689|5366663:-@Supercontig_12.4:5366482:5366588:-	5'SS	0.13	0.09	0.17	0.06	0.03	0.11	0.07	0.81
Supercontig_12.4:1186099:1185766|1185701:-@Supercontig_12.4:1184895:1185617:-	5'SS	0.45	0.37	0.53	0.53	0.46	0.61	-0.08	0.45
Supercontig_12.4:2862291:2862885|2862854:+@Supercontig_12.4:2863034:2866669:+	5'SS	0.19	0.08	0.32	0.1	0.04	0.17	0.09	0.32
Supercontig_12.4:3204043:3203643|3203382:-@Supercontig_12.4:3203213:3203321:-	5'SS	0.87	0.8	0.92	0.85	0.76	0.93	0.02	0.14
Supercontig_12.4:2203909:2203184|2203057:-@Supercontig_12.4:2200526:2202941:-	5'SS	0.08	0.04	0.12	0.06	0.03	0.11	0.02	0.09
Supercontig_12.4:1974282:1974078|1973979:-@Supercontig_12.4:1972575:1973898:-	5'SS	0.67	0.56	0.77	0.71	0.59	0.82	-0.04	0.23
Supercontig_12.4:2827685:2827834|2827800:+@Supercontig_12.4:2827994:2828061:+	5'SS	0	0	0	0	0	0	0	0
Supercontig_12.4:3643205:3642567|3642548:-@Supercontig_12.4:3642330:3642490:-	5'SS	0.99	0.95	1	0.85	0.75	0.93	0.14	43.64
Supercontig_12.4:2754248:2754142|2754039:-@Supercontig_12.4:2753026:2753981:-	5'SS	0.01	0	0.01	0.01	0	0.01	0	0
Supercontig_12.4:750028:750561|750557:+@Supercontig_12.4:750633:752599:+	5'SS	0.07	0.05	0.09	0.05	0.04	0.07	0.02	0.07
Supercontig_12.4:1573522:1573112|1573079:-@Supercontig_12.4:1572067:1573006:-	5'SS	0.08	0	0.29	0.08	0.01	0.2	0	0.21
Supercontig_12.4:3632467:3632249|3632244:-@Supercontig_12.4:3627951:3632027:-	5'SS	0.02	0	0.08	0.02	0	0.09	0	0.05
Supercontig_12.4:4504376:4504525|4504479:+@Supercontig_12.4:4504578:4504770:+	5'SS	0.12	0.07	0.19	0.27	0.17	0.37	-0.15	3.53
Supercontig_12.4:4102740:4102585|4102581:-@Supercontig_12.4:4101779:4102514:-	5'SS	0.26	0.12	0.41	0.05	0.01	0.14	0.21	4.4
Supercontig_12.4:4332976:4332759|4332693:-@Supercontig_12.4:4330308:4332608:-	5'SS	0.11	0.02	0.24	0.07	0.01	0.19	0.04	0.18
Supercontig_12.4:5553147:5552912|5552908:-@Supercontig_12.4:5552150:5552804:-	5'SS	0.01	0	0.02	0.01	0	0.03	0	0
Supercontig_12.4:4343331:4342771|4342668:-@Supercontig_12.4:4342376:4342599:-	5'SS	0.4	0.13	0.71	0.64	0.31	0.93	-0.24	1.05
Supercontig_12.4:1204063:1203806|1203646:-@Supercontig_12.4:1202151:1203429:-	5'SS	0.27	0.18	0.38	0.25	0.16	0.35	0.02	0.19
Supercontig_12.4:3705524:3705937|3705921:+@Supercontig_12.4:3706019:3707353:+	5'SS	0.04	0.03	0.06	0	0	0.01	0.04	1.72215e+08
Supercontig_12.4:2058673:2058983|2058876:+@Supercontig_12.4:2059050:2059686:+	5'SS	0.03	0.02	0.05	0.03	0.02	0.04	0	0
Supercontig_12.4:4347628:4348243|4348223:+@Supercontig_12.4:4348301:4350238:+	5'SS	0.09	0.05	0.15	0.02	0	0.04	0.07	36.07
Supercontig_12.4:1185849:1185731|1185701:-@Supercontig_12.4:1184895:1185617:-	5'SS	0.63	0.5	0.74	0.53	0.4	0.67	0.1	0.44
Supercontig_12.3:4180235:4180492|4180487:+@Supercontig_12.3:4180567:4181106:+	5'SS	0.03	0.01	0.06	0.17	0.11	0.25	-0.14	7313.45
Supercontig_12.3:2574646:2575362|2575221:+@Supercontig_12.3:2575433:2577796:+	5'SS	0.07	0.02	0.15	0.09	0.04	0.15	-0.02	0.14
Supercontig_12.3:500876:500959|500956:+@Supercontig_12.3:501053:501170:+	5'SS	0.13	0.1	0.15	0.07	0.06	0.09	0.06	11.16
Supercontig_12.3:1822165:1823423|1823415:+@Supercontig_12.3:1823478:1826583:+	5'SS	0.95	0.85	1	0.77	0.66	0.87	0.18	4.59
Supercontig_12.3:613207:614127|613250:+@Supercontig_12.3:614213:614286:+	5'SS	0.78	0.71	0.85	0.7	0.64	0.77	0.08	0.42
Supercontig_12.3:4382412:4382899|4382861:+@Supercontig_12.3:4382987:4385813:+	5'SS	0.02	0	0.06	0.1	0.05	0.17	-0.08	1.69
Supercontig_12.3:1562937:1562150|1562105:-@Supercontig_12.3:1561500:1561828:-	5'SS	0.03	0.01	0.09	0.06	0.01	0.13	-0.03	0.12
Supercontig_12.3:4460313:4459662|4459658:-@Supercontig_12.3:4459068:4459307:-	5'SS	0.02	0	0.07	0.06	0.02	0.15	-0.04	0.15
Supercontig_12.3:3798572:3798677|3798673:+@Supercontig_12.3:3798736:3798800:+	5'SS	0.02	0	0.06	0.28	0.22	0.34	-0.26	1000000000000
Supercontig_12.3:4898254:4898930|4898774:+@Supercontig_12.3:4899013:4900162:+	5'SS	0.04	0.01	0.1	0.07	0.02	0.14	-0.03	0.12
Supercontig_12.3:2784705:2784076|2783993:-@Supercontig_12.3:2783806:2783930:-	5'SS	0.01	0	0.03	0.04	0.02	0.07	-0.03	0.51
Supercontig_12.3:1200310:1198974|1198906:-@Supercontig_12.3:1198756:1198851:-	5'SS	0.03	0.02	0.05	0.05	0.04	0.07	-0.02	0.13
Supercontig_12.3:1628799:1628618|1628383:-@Supercontig_12.3:1628200:1628319:-	5'SS	0.03	0.02	0.04	0.03	0.02	0.04	0	0
Supercontig_12.3:2058810:2059348|2059146:+@Supercontig_12.3:2059893:2060366:+	5'SS	0.06	0.04	0.09	0.04	0.02	0.05	0.02	0.22
Supercontig_12.3:993299:993146|992879:-@Supercontig_12.3:992424:992729:-	5'SS	0.11	0.11	0.12	0.09	0.08	0.09	0.02	1000000000000
Supercontig_12.3:1772313:1772214|1772096:-@Supercontig_12.3:1771574:1772004:-	5'SS	0.47	0.4	0.53	0.5	0.44	0.56	-0.03	0.16
Supercontig_12.3:2038937:2038679|2038452:-@Supercontig_12.3:2037870:2038376:-	5'SS	0.01	0	0.01	0	0	0	0.01	0
Supercontig_12.3:3878726:3879398|3878878:+@Supercontig_12.3:3879428:3879555:+	5'SS	0.17	0.15	0.19	0.07	0.06	0.08	0.1	1000000000000
Supercontig_12.3:1967162:1966962|1966838:-@Supercontig_12.3:1966671:1966735:-	5'SS	0.01	0.01	0.01	0.01	0	0.01	0	0
Supercontig_12.3:5239371:5241012|5240906:+@Supercontig_12.3:5241083:5241715:+	5'SS	0.03	0.01	0.06	0.05	0.02	0.09	-0.02	0.11
Supercontig_12.3:2574646:2575362|2575129:+@Supercontig_12.3:2575433:2577796:+	5'SS	0.13	0.07	0.2	0.08	0.05	0.12	0.05	0.17
Supercontig_12.3:1918816:1918941|1918937:+@Supercontig_12.3:1919018:1920002:+	5'SS	0.04	0.04	0.05	0.06	0.06	0.07	-0.02	1000000000000
Supercontig_12.3:4030218:4029780|4029740:-@Supercontig_12.3:4028859:4029720:-	5'SS	0	0	0	0	0	0	0	0
Supercontig_12.3:1126884:1127345|1127341:+@Supercontig_12.3:1127438:1127561:+	5'SS	0	0	0	0	0	0	0	0
Supercontig_12.3:3930978:3931219|3931178:+@Supercontig_12.3:3931357:3941213:+	5'SS	0.33	0.14	0.57	0.47	0.31	0.64	-0.14	0.66
Supercontig_12.3:5270939:5270560|5270556:-@Supercontig_12.3:5269831:5270488:-	5'SS	0.06	0.03	0.08	0.01	0	0.02	0.05	50.16
Supercontig_12.3:3076569:3076746|3076744:+@Supercontig_12.3:3077054:3077072:+	5'SS	0	0	0	0	0	0	0	0
Supercontig_12.3:3146510:3146187|3146183:-@Supercontig_12.3:3142667:3146025:-	5'SS	0.02	0	0.05	0.12	0.07	0.2	-0.1	19.18
Supercontig_12.3:2484352:2485521|2485483:+@Supercontig_12.3:2485591:2486569:+	5'SS	0.01	0	0.02	0.01	0	0.02	0	0
Supercontig_12.3:4218805:4218079|4218075:-@Supercontig_12.3:4217845:4218025:-	5'SS	0.03	0.01	0.04	0.03	0.01	0.04	0	0
Supercontig_12.3:1465414:1464330|1464191:-@Supercontig_12.3:1464016:1464135:-	5'SS	0.03	0.01	0.05	0.02	0.01	0.03	0.01	0.04
Supercontig_12.3:2385090:2385062|2385012:-@Supercontig_12.3:2383779:2384972:-	5'SS	0	0	0.01	0	0	0.01	0	0
Supercontig_12.3:1957749:1957982|1957953:+@Supercontig_12.3:1958134:1958427:+	5'SS	0.27	0.24	0.29	0.32	0.3	0.35	-0.05	2.28
Supercontig_12.3:37135:36895|36891:-@Supercontig_12.3:35785:36808:-	5'SS	0	0	0.02	0.01	0	0.02	-0.01	0
Supercontig_12.3:2379374:2379722|2379553:+@Supercontig_12.3:2379869:2380225:+	5'SS	0.01	0.01	0.02	0.01	0	0.01	0	0
Supercontig_12.1:1441012:1441142|1441112:+@Supercontig_12.1:1441248:1441976:+	5'SS	0.06	0.02	0.13	0.03	0.01	0.06	0.03	0.15
Supercontig_12.1:6933026:6932628|6932612:-@Supercontig_12.1:6932375:6932542:-	5'SS	0.09	0.02	0.21	0.08	0.02	0.16	0.01	0.16
Supercontig_12.1:5582138:5582663|5582659:+@Supercontig_12.1:5582769:5583798:+	5'SS	0.03	0	0.08	0.03	0.01	0.06	0	0.06
Supercontig_12.1:7919267:7919161|7919139:-@Supercontig_12.1:7918930:7919035:-	5'SS	0.91	0.85	0.95	0.98	0.94	1	-0.07	1.39
Supercontig_12.1:5899471:5898996|5898769:-@Supercontig_12.1:5898536:5898641:-	5'SS	0.07	0.05	0.08	0.09	0.07	0.1	-0.02	0.11
Supercontig_12.1:9059057:9058866|9058830:-@Supercontig_12.1:9058557:9058702:-	5'SS	0	0	0.01	0.01	0.01	0.02	-0.01	0
Supercontig_12.1:1898329:1898152|1897992:-@Supercontig_12.1:1897863:1897961:-	5'SS	0.11	0.1	0.11	0.12	0.11	0.12	-0.01	0.09
Supercontig_12.1:7049640:7050040|7050036:+@Supercontig_12.1:7050141:7050394:+	5'SS	0.02	0.02	0.03	0.02	0.01	0.03	0	0
Supercontig_12.1:3148918:3148413|3148409:-@Supercontig_12.1:3147842:3148351:-	5'SS	0.01	0	0.01	0.01	0	0.02	0	0
Supercontig_12.1:7279481:7280925|7280889:+@Supercontig_12.1:7280989:7283180:+	5'SS	0.01	0	0.03	0.02	0	0.05	-0.01	0.04
Supercontig_12.1:7553818:7551966|7551787:-@Supercontig_12.1:7551262:7551515:-	5'SS	0.01	0	0.02	0.04	0.02	0.06	-0.03	0.99
Supercontig_12.1:4562152:4561914|4561910:-@Supercontig_12.1:4560893:4561761:-	5'SS	0.01	0.01	0.01	0.03	0.03	0.03	-0.02	1000000000000
Supercontig_12.1:5714582:5714299|5714035:-@Supercontig_12.1:5713676:5713947:-	5'SS	0.65	0.56	0.74	0.62	0.54	0.7	0.03	0.18
Supercontig_12.1:4933083:4932378|4932349:-@Supercontig_12.1:4931151:4932293:-	5'SS	0.01	0	0.02	0.02	0.01	0.04	-0.01	0.05
Supercontig_12.1:7678094:7677965|7677961:-@Supercontig_12.1:7676339:7677836:-	5'SS	0.34	0.27	0.42	0.39	0.34	0.44	-0.05	0.2
Supercontig_12.1:9280151:9279981|9279827:-@Supercontig_12.1:9279336:9279693:-	5'SS	0	0	0	0	0	0	0	0
Supercontig_12.1:1542181:1541217|1541133:-@Supercontig_12.1:1539599:1541060:-	5'SS	0.01	0	0.03	0.02	0.01	0.05	-0.01	0.05
Supercontig_12.1:9417124:9417323|9417251:+@Supercontig_12.1:9417412:9418224:+	5'SS	0.01	0	0.02	0.03	0.01	0.04	-0.02	0.25
Supercontig_12.1:3398737:3398609|3398527:-@Supercontig_12.1:3397640:3398492:-	5'SS	0.01	0	0.01	0	0	0.01	0.01	0
Supercontig_12.1:6061391:6062128|6061814:+@Supercontig_12.1:6062257:6062653:+	5'SS	0.38	0.32	0.44	0.56	0.49	0.63	-0.18	98.76
Supercontig_12.1:1837872:1837802|1837731:-@Supercontig_12.1:1836873:1837697:-	5'SS	0	0	0	0	0	0	0	0
Supercontig_12.1:4964761:4965009|4965005:+@Supercontig_12.1:4965082:4965280:+	5'SS	0	0	0.01	0	0	0.01	0	0
Supercontig_12.1:5123090:5123193|5123188:+@Supercontig_12.1:5123243:5126129:+	5'SS	0.87	0.71	0.95	0.89	0.72	0.98	-0.02	0.24
Supercontig_12.1:3674855:3675260|3674910:+@Supercontig_12.1:3675302:3675715:+	5'SS	0.28	0.26	0.31	0.13	0.12	0.14	0.15	1000000000000
Supercontig_12.1:6244337:6244153|6244148:-@Supercontig_12.1:6243420:6244094:-	5'SS	0.48	0.05	0.94	0.6	0.14	0.96	-0.12	0.91
Supercontig_12.1:4953060:4954077|4954060:+@Supercontig_12.1:4954141:4954319:+	5'SS	0.09	0.02	0.2	0.06	0.01	0.14	0.03	0.16
Supercontig_12.1:1694696:1693918|1693914:-@Supercontig_12.1:1690523:1693848:-	5'SS	0.01	0	0.01	0.01	0	0.01	0	0
Supercontig_12.1:7819365:7819184|7818949:-@Supercontig_12.1:7817742:7818792:-	5'SS	0.08	0.07	0.09	0.02	0.02	0.03	0.06	1000000000000
Supercontig_12.1:8305456:8306121|8306083:+@Supercontig_12.1:8306184:8307048:+	5'SS	0.07	0.03	0.13	0.13	0.07	0.19	-0.06	0.27
Supercontig_12.1:5714582:5714299|5714030:-@Supercontig_12.1:5713676:5713947:-	5'SS	0.77	0.67	0.86	0.72	0.65	0.79	0.05	0.22
Supercontig_12.1:8475709:8476056|8475866:+@Supercontig_12.1:8476154:8477034:+	5'SS	0.19	0.16	0.24	0.12	0.09	0.15	0.07	6.58
Supercontig_12.1:3024285:3024413|3024403:+@Supercontig_12.1:3024472:3024617:+	5'SS	0.02	0.01	0.04	0	0	0.01	0.02	0.2
Supercontig_12.1:5800724:5800325|5800269:-@Supercontig_12.1:5799807:5800210:-	5'SS	0.05	0	0.13	0.15	0.06	0.26	-0.1	0.65
Supercontig_12.1:437279:438418|438196:+@Supercontig_12.1:438483:440326:+	5'SS	0.19	0.15	0.24	0.11	0.09	0.14	0.08	2.31
Supercontig_12.1:7405097:7405030|7404799:-@Supercontig_12.1:7404590:7404759:-	5'SS	0	0	0	0	0	0	0	0
Supercontig_12.1:521932:522221|522200:+@Supercontig_12.1:522411:522853:+	5'SS	0	0	0.01	0	0	0	0	0
Supercontig_12.1:4335128:4334594|4334590:-@Supercontig_12.1:4333774:4334504:-	5'SS	0.04	0.03	0.04	0.03	0.02	0.03	0.01	0.25
Supercontig_12.1:539196:539967|539788:+@Supercontig_12.1:540012:540343:+	5'SS	0.1	0.08	0.11	0.05	0.04	0.06	0.05	102018
Supercontig_12.1:417936:418266|418262:+@Supercontig_12.1:418329:419464:+	5'SS	0.01	0.01	0.03	0.01	0	0.02	0	0
Supercontig_12.1:8073142:8073086|8072971:-@Supercontig_12.1:8072794:8072907:-	5'SS	0.14	0.1	0.19	0.11	0.08	0.15	0.03	0.13
Supercontig_12.1:5228824:5228721|5228400:-@Supercontig_12.1:5227128:5228330:-	5'SS	0.41	0.36	0.45	0.33	0.29	0.37	0.08	1.59
Supercontig_12.1:4957263:4957787|4957621:+@Supercontig_12.1:4957800:4957969:+	5'SS	0.01	0	0.01	0	0	0	0.01	0
Supercontig_12.1:2671170:2670624|2670509:-@Supercontig_12.1:2669902:2670448:-	5'SS	0.01	0	0.04	0.03	0.01	0.05	-0.02	0.06
Supercontig_12.1:4247227:4247610|4247602:+@Supercontig_12.1:4247667:4250308:+	5'SS	0.45	0.3	0.62	0.52	0.42	0.62	-0.07	0.31
Supercontig_12.1:5553006:5553371|5553312:+@Supercontig_12.1:5553432:5554016:+	5'SS	0	0	0.01	0	0	0	0	0
Supercontig_12.1:4124107:4124235|4124197:+@Supercontig_12.1:4124298:4124372:+	5'SS	0.02	0.01	0.05	0.04	0	0.08	-0.02	0.06
Supercontig_12.1:7373518:7373433|7373368:-@Supercontig_12.1:7370870:7373260:-	5'SS	0.86	0.79	0.92	0.77	0.69	0.85	0.09	0.53
Supercontig_12.1:7405336:7405192|7405170:-@Supercontig_12.1:7405030:7405097:-	5'SS	0	0	0	0	0	0	0	0
Supercontig_12.1:2582985:2582565|2582415:-@Supercontig_12.1:2580351:2580869:-	5'SS	0	0	0	0	0	0	0	0
Supercontig_12.1:4867561:4866343|4866330:-@Supercontig_12.1:4865470:4866275:-	5'SS	0.04	0.03	0.06	0.1	0.08	0.13	-0.06	11.02
Supercontig_12.1:5394388:5393700|5393604:-@Supercontig_12.1:5393188:5393411:-	5'SS	0.72	0.64	0.8	0.81	0.75	0.87	-0.09	0.44
Supercontig_12.1:6142453:6142657|6142587:+@Supercontig_12.1:6143029:6143279:+	5'SS	0.99	0.97	1	0.95	0.93	0.97	0.04	0.7
Supercontig_12.1:8350820:8350867|8350854:+@Supercontig_12.1:8350922:8352115:+	5'SS	0	0	0.01	0	0	0.01	0	0
Supercontig_12.1:6457409:6457101|6457049:-@Supercontig_12.1:6456247:6457014:-	5'SS	0.01	0.01	0.02	0.01	0.01	0.02	0	0
Supercontig_12.1:1800837:1800626|1800621:-@Supercontig_12.1:1799279:1800564:-	5'SS	0	0	0	0	0	0	0	0
Supercontig_12.1:7919484:7919183|7919139:-@Supercontig_12.1:7918930:7919035:-	5'SS	0.6	0.54	0.66	0.39	0.33	0.45	0.21	4004.7
Supercontig_12.1:5413262:5412974|5412962:-@Supercontig_12.1:5412656:5412851:-	5'SS	0.33	0.3	0.37	0.14	0.1	0.18	0.19	1000000000000
Supercontig_12.1:713665:713294|713029:-@Supercontig_12.1:711562:712939:-	5'SS	0.35	0.31	0.4	0.32	0.27	0.36	0.03	0.14
Supercontig_12.1:1837872:1837802|1837731:-@Supercontig_12.1:1837039:1837697:-	5'SS	0	0	0	0	0	0	0	0
Supercontig_12.1:5945167:5946166|5945759:+@Supercontig_12.1:5946175:5946305:+	5'SS	0.02	0.02	0.03	0.05	0.05	0.06	-0.03	1000000000000
Supercontig_12.1:1755449:1755202|1755161:-@Supercontig_12.1:1754792:1755102:-	5'SS	0	0	0	0	0	0.01	0	0
Supercontig_12.1:7462867:7462377|7462065:-@Supercontig_12.1:7460678:7461960:-	5'SS	0.05	0.03	0.07	0.08	0.06	0.12	-0.03	0.26
Supercontig_12.1:4562551:4562429|4562244:-@Supercontig_12.1:4561914:4562152:-	5'SS	0.03	0.03	0.03	0	0	0	0.03	1000000000000
Supercontig_12.1:8967632:8968807|8968658:+@Supercontig_12.1:8969012:8969145:+	5'SS	0.02	0	0.06	0.05	0.01	0.09	-0.03	0.16
Supercontig_12.1:3044847:3047364|3047360:+@Supercontig_12.1:3047450:3047942:+	5'SS	0.01	0	0.02	0.01	0	0.03	0	0
Supercontig_12.1:1267870:1267828|1267776:-@Supercontig_12.1:1267568:1267710:-	5'SS	0.79	0.68	0.89	0.97	0.91	1	-0.18	21.74
Supercontig_12.1:1155147:1155058|1155036:-@Supercontig_12.1:1154413:1154948:-	5'SS	0.3	0.2	0.43	0.2	0.09	0.35	0.1	0.44
Supercontig_12.1:6014059:6014149|6014145:+@Supercontig_12.1:6014264:6014709:+	5'SS	0.34	0.16	0.54	0.22	0.08	0.4	0.12	0.5
Supercontig_12.1:8563889:8563728|8563576:-@Supercontig_12.1:8563144:8563253:-	5'SS	0.01	0	0.02	0	0	0.01	0.01	0
Supercontig_12.1:7819365:7819184|7818976:-@Supercontig_12.1:7817742:7818792:-	5'SS	0.09	0.08	0.1	0.03	0.02	0.03	0.06	1000000000000
Supercontig_12.1:6545904:6545987|6545950:+@Supercontig_12.1:6546051:6548172:+	5'SS	0.62	0.45	0.81	0.77	0.64	0.88	-0.15	0.89
Supercontig_12.1:5682240:5682113|5682069:-@Supercontig_12.1:5681906:5681996:-	5'SS	0	0	0	0	0	0	0	0
Supercontig_12.1:7317207:7317999|7317520:+@Supercontig_12.1:7318088:7318304:+	5'SS	0.63	0.51	0.76	0.78	0.69	0.85	-0.15	1.47
Supercontig_12.1:8608312:8608673|8608669:+@Supercontig_12.1:8608747:8608913:+	5'SS	0.01	0	0.03	0.01	0	0.02	0	0.03
Supercontig_12.1:6061391:6062139|6061814:+@Supercontig_12.1:6062257:6062653:+	5'SS	0.25	0.2	0.31	0.37	0.31	0.44	-0.12	2.7
Supercontig_12.1:5728917:5728448|5728378:-@Supercontig_12.1:5727235:5728329:-	5'SS	0	0	0	0	0	0	0	0
Supercontig_12.1:6364439:6364107|6364092:-@Supercontig_12.1:6363644:6364039:-	5'SS	0.05	0.03	0.07	0.07	0.05	0.1	-0.02	0.14
Supercontig_12.1:5945766:5946166|5946062:+@Supercontig_12.1:5946175:5946305:+	5'SS	0.01	0.01	0.02	0.03	0.02	0.03	-0.02	23.78
Supercontig_12.1:821897:821931|821910:+@Supercontig_12.1:822377:823144:+	5'SS	0	0	0	0	0	0	0	0
Supercontig_12.1:6006823:6006533|6006528:-@Supercontig_12.1:6004604:6006324:-	5'SS	0.64	0.53	0.73	0.48	0.4	0.57	0.16	1.55
Supercontig_12.1:3407982:3408249|3408115:+@Supercontig_12.1:3408326:3408356:+	5'SS	0.02	0.01	0.04	0.01	0	0.02	0.01	0.07
Supercontig_12.1:6782745:6781448|6781435:-@Supercontig_12.1:6780501:6781376:-	5'SS	0.01	0	0.02	0.01	0	0.01	0	0
Supercontig_12.1:4562551:4562429|4562366:-@Supercontig_12.1:4561914:4562152:-	5'SS	0.04	0.04	0.04	0	0	0	0.04	1000000000000
Supercontig_12.1:8003927:8004081|8003998:+@Supercontig_12.1:8004163:8005035:+	5'SS	0.07	0	0.3	0.33	0.12	0.6	-0.26	1.57
Supercontig_12.1:5776958:5777830|5777728:+@Supercontig_12.1:5777895:5778271:+	5'SS	0.02	0.01	0.03	0.02	0.01	0.03	0	0
Supercontig_12.1:7747981:7747699|7747655:-@Supercontig_12.1:7746115:7747352:-	5'SS	0	0	0.01	0	0	0	0	0
Supercontig_12.5:1946420:1944501|1944440:-@Supercontig_12.5:1943380:1944289:-	5'SS	0.2	0.03	0.51	0.11	0.01	0.35	0.09	0.4
Supercontig_12.5:849729:849431|849422:-@Supercontig_12.5:848382:849364:-	5'SS	0.03	0.01	0.06	0.02	0	0.06	0.01	0.06
Supercontig_12.5:4158186:4158026|4157762:-@Supercontig_12.5:4157621:4157729:-	5'SS	0.99	0.98	1	1	1	1	-0.01	0
Supercontig_12.5:3747910:3748421|3748417:+@Supercontig_12.5:3748482:3750386:+	5'SS	0.01	0	0.02	0	0	0.01	0.01	0
Supercontig_12.5:6358025:6357775|6357489:-@Supercontig_12.5:6354743:6357415:-	5'SS	0.85	0.79	0.92	0.83	0.78	0.88	0.02	0.12
Supercontig_12.5:6272325:6272757|6272753:+@Supercontig_12.5:6272815:6274690:+	5'SS	0.06	0	0.16	0.06	0.01	0.2	0	0.13
Supercontig_12.5:1339355:1340038|1340023:+@Supercontig_12.5:1340113:1340675:+	5'SS	0.14	0.05	0.28	0.14	0.05	0.26	0	0.2
Supercontig_12.5:3841939:3841719|3841635:-@Supercontig_12.5:3841127:3841570:-	5'SS	0.02	0.01	0.04	0.03	0.02	0.05	-0.01	0.04
Supercontig_12.5:5615105:5615251|5615233:+@Supercontig_12.5:5615314:5615666:+	5'SS	0.1	0.06	0.15	0.04	0.02	0.06	0.06	2.66
Supercontig_12.5:322740:323340|323303:+@Supercontig_12.5:323426:325083:+	5'SS	0.11	0.08	0.15	0.12	0.08	0.17	-0.01	0.08
Supercontig_12.5:5121433:5121343|5121339:-@Supercontig_12.5:5121195:5121283:-	5'SS	0.27	0.24	0.3	0.25	0.23	0.28	0.02	0.07
Supercontig_12.5:5496224:5495575|5495571:-@Supercontig_12.5:5494992:5495516:-	5'SS	0.68	0.66	0.71	0.57	0.53	0.61	0.11	3.57461e+08
Supercontig_12.5:3221283:3221471|3221409:+@Supercontig_12.5:3221479:3222418:+	5'SS	0	0	0	0	0	0	0	0
Supercontig_12.5:3684922:3685071|3685051:+@Supercontig_12.5:3685132:3685395:+	5'SS	0	0	0	0	0	0	0	0
Supercontig_12.5:4781437:4782152|4781996:+@Supercontig_12.5:4782236:4783164:+	5'SS	0.01	0.01	0.02	0.01	0.01	0.02	0	0
Supercontig_12.5:1351008:1350835|1350831:-@Supercontig_12.5:1350346:1350772:-	5'SS	0	0	0.01	0	0	0.01	0	0
Supercontig_12.5:6360603:6360865|6360817:+@Supercontig_12.5:6361142:6362021:+	5'SS	0.01	0	0.03	0.04	0.01	0.08	-0.03	0.09
Supercontig_12.5:5759137:5758785|5758491:-@Supercontig_12.5:5757143:5758001:-	5'SS	0	0	0	0.07	0.07	0.08	-0.07	1000000000000
Supercontig_12.5:6246472:6247196|6247191:+@Supercontig_12.5:6247256:6247443:+	5'SS	0.14	0.04	0.31	0.09	0.02	0.23	0.05	0.24
Supercontig_12.5:2569024:2569296|2569187:+@Supercontig_12.5:2569380:2570896:+	5'SS	0.3	0.23	0.37	0.34	0.26	0.42	-0.04	0.16
Supercontig_12.5:631841:632245|632203:+@Supercontig_12.5:632319:636726:+	5'SS	0.03	0.01	0.07	0.01	0	0.03	0.02	0.07
Supercontig_12.5:5615105:5615257|5615251:+@Supercontig_12.5:5615314:5615666:+	5'SS	0.06	0.01	0.16	0.06	0.01	0.16	0	0.12
Supercontig_12.5:2259172:2258904|2258900:-@Supercontig_12.5:2258736:2258838:-	5'SS	0.05	0.02	0.09	0.06	0.02	0.1	-0.01	0.07
Supercontig_12.5:3019641:3018714|3018661:-@Supercontig_12.5:3017290:3018609:-	5'SS	0.1	0.06	0.13	0.06	0.04	0.09	0.04	0.21
Supercontig_12.5:2256313:2256127|2255852:-@Supercontig_12.5:2255743:2255842:-	5'SS	0.01	0.01	0.01	0.01	0.01	0.01	0	0
Supercontig_12.5:5469105:5468400|5468352:-@Supercontig_12.5:5467674:5468277:-	5'SS	0	0	0	0	0	0	0	0
Supercontig_12.5:241179:241625|241547:+@Supercontig_12.5:241681:242945:+	5'SS	0.01	0	0.02	0.01	0	0.01	0	0
Supercontig_12.5:1229000:1229078|1229051:+@Supercontig_12.5:1229142:1230082:+	5'SS	0.05	0.03	0.07	0	0	0.01	0.05	1000000000000
Supercontig_12.5:322740:323340|322925:+@Supercontig_12.5:323426:325083:+	5'SS	0.25	0.22	0.28	0.25	0.22	0.28	0	0.05
Supercontig_12.5:4008742:4008660|4008651:-@Supercontig_12.5:4007434:4008598:-	5'SS	0	0	0	0	0	0	0	0
Supercontig_12.5:5244451:5245307|5245140:+@Supercontig_12.5:5245379:5246447:+	5'SS	0.06	0.03	0.11	0.07	0.04	0.11	-0.01	0.08
Supercontig_12.5:3203095:3202606|3202582:-@Supercontig_12.5:3202264:3202539:-	5'SS	0	0	0	0	0	0	0	0
Supercontig_12.5:4782055:4782142|4782116:+@Supercontig_12.5:4782236:4783164:+	5'SS	0.02	0	0.04	0.01	0	0.02	0.01	0.03
Supercontig_12.5:5615105:5615257|5615233:+@Supercontig_12.5:5615314:5615666:+	5'SS	0.02	0	0.04	0	0	0.01	0.02	0.08
Supercontig_12.5:4009736:4008998|4008792:-@Supercontig_12.5:4007434:4008598:-	5'SS	0.16	0.15	0.16	0.15	0.14	0.15	0.01	0.15
Supercontig_12.5:4009736:4008998|4008759:-@Supercontig_12.5:4007434:4008598:-	5'SS	0.14	0.13	0.14	0.13	0.12	0.13	0.01	0
Supercontig_12.5:4809696:4808688|4808645:-@Supercontig_12.5:4804017:4808542:-	5'SS	0.36	0.18	0.56	0.16	0.06	0.34	0.2	1.03
Supercontig_12.5:5848075:5848754|5848367:+@Supercontig_12.5:5848769:5849153:+	5'SS	0	0	0	0	0	0	0	0
Supercontig_12.5:4653501:4652155|4651975:-@Supercontig_12.5:4647463:4651900:-	5'SS	0.79	0.67	0.89	0.77	0.66	0.89	0.02	0.22
Supercontig_12.5:220460:220640|220588:+@Supercontig_12.5:220716:220774:+	5'SS	0.08	0.07	0.09	0.07	0.06	0.09	0.01	0
Supercontig_12.5:5429595:5429852|5429848:+@Supercontig_12.5:5429921:5430486:+	5'SS	0	0	0	0	0	0	0	0
Supercontig_12.5:3847646:3847896|3847752:+@Supercontig_12.5:3847955:3848048:+	5'SS	0.72	0.46	0.96	0.68	0.48	0.85	0.04	0.38
Supercontig_12.5:4914071:4914386|4914382:+@Supercontig_12.5:4914468:4914591:+	5'SS	0	0	0.01	0.01	0	0.02	-0.01	0
Supercontig_12.2:3571448:3572321:+@Supercontig_12.2:3572356|3572416:3572798:+	3'SS	0.01	0.01	0.01	0.03	0.03	0.03	-0.02	1000000000000
Supercontig_12.2:4178202:4178304:+@Supercontig_12.2:4178336|4178360:4178428:+	3'SS	0	0	0	0	0	0	0	0
Supercontig_12.2:4401168:4401213:-@Supercontig_12.2:4400899|4401120:4400716:-	3'SS	0.01	0.01	0.01	0.01	0	0.01	0	0
Supercontig_12.2:4406089:4406187:+@Supercontig_12.2:4406231|4406380:4406868:+	3'SS	0	0	0	0	0	0	0	0
Supercontig_12.2:2634938:2636433:+@Supercontig_12.2:2636489|2636492:2640617:+	3'SS	0.34	0.25	0.44	0.44	0.36	0.51	-0.1	0.44
Supercontig_12.2:2794864:2795200:-@Supercontig_12.2:2794546|2794592:2792898:-	3'SS	0.04	0	0.13	0.09	0.02	0.17	-0.05	0.2
Supercontig_12.2:1657330:1657523:-@Supercontig_12.2:1657261|1657292:1656986:-	3'SS	0.01	0	0.01	0	0	0.01	0.01	0
Supercontig_12.2:4406089:4406187:+@Supercontig_12.2:4406231|4406380:4407556:+	3'SS	0	0	0	0	0	0	0	0
Supercontig_12.2:2392643:2392714:+@Supercontig_12.2:2392761|2392770:2393531:+	3'SS	0.02	0	0.06	0.04	0.02	0.08	-0.02	0.09
Supercontig_12.2:4178202:4178304:+@Supercontig_12.2:4178449|4178488:4180433:+	3'SS	0.09	0.08	0.09	0.06	0.06	0.07	0.03	1000000000000
Supercontig_12.2:1447499:1447756:+@Supercontig_12.2:1447869|1447944:1453234:+	3'SS	0.06	0.03	0.1	0.08	0.05	0.11	-0.02	0.08
Supercontig_12.2:4457764:4458042:+@Supercontig_12.2:4458138|4458151:4463973:+	3'SS	0.18	0.01	0.57	0.24	0.08	0.5	-0.06	0.49
Supercontig_12.2:3332319:3332814:+@Supercontig_12.2:3333244|3333320:3333640:+	3'SS	0.55	0.41	0.69	0.46	0.21	0.72	0.09	0.48
Supercontig_12.2:2976807:2976899:-@Supercontig_12.2:2976693|2976733:2975929:-	3'SS	0	0	0.01	0.03	0.02	0.03	-0.03	1000000000000
Supercontig_12.2:3492605:3493366:-@Supercontig_12.2:3492485|3492542:3490348:-	3'SS	0.17	0.08	0.29	0.15	0.07	0.27	0.02	0.19
Supercontig_12.2:4178202:4178304:+@Supercontig_12.2:4178459|4178488:4180504:+	3'SS	0.12	0.12	0.13	0.09	0.08	0.1	0.03	1000000000000
Supercontig_12.2:3571448:3572321:+@Supercontig_12.2:3572370|3572416:3572798:+	3'SS	0.01	0.01	0.01	0.03	0.03	0.03	-0.02	1000000000000
Supercontig_12.2:3180104:3180408:+@Supercontig_12.2:3180490|3180971:3181101:+	3'SS	0.01	0.01	0.01	0.02	0.02	0.02	-0.01	0
Supercontig_12.2:4178202:4178304:+@Supercontig_12.2:4178459|4178488:4179566:+	3'SS	0.07	0.06	0.07	0.05	0.04	0.05	0.02	1000000000000
Supercontig_12.2:4457764:4458042:+@Supercontig_12.2:4458138|4458147:4463973:+	3'SS	0.05	0	0.21	0.08	0.01	0.17	-0.03	0.23
Supercontig_12.2:4178202:4178304:+@Supercontig_12.2:4178352|4178360:4178428:+	3'SS	0	0	0	0	0	0	0	0
Supercontig_12.2:2486675:2486873:-@Supercontig_12.2:2486076|2486178:2485308:-	3'SS	0.56	0.46	0.66	0.56	0.47	0.65	0	0.17
Supercontig_12.2:4317187:4317667:+@Supercontig_12.2:4317746|4317844:4318036:+	3'SS	0.19	0.09	0.32	0.32	0.2	0.44	-0.13	0.58
Supercontig_12.2:2543902:2544442:-@Supercontig_12.2:2543842|2543896:2541687:-	3'SS	0.01	0	0.02	0	0	0.02	0.01	0
Supercontig_12.2:2267704:2268040:+@Supercontig_12.2:2268104|2268133:2268834:+	3'SS	0	0	0	0	0	0	0	0
Supercontig_12.2:190539:193428:-@Supercontig_12.2:190424|190440:189409:-	3'SS	0.14	0.09	0.19	0.1	0.07	0.13	0.04	0.17
Supercontig_12.2:4178202:4178304:+@Supercontig_12.2:4178459|4178488:4180433:+	3'SS	0.12	0.11	0.13	0.09	0.08	0.09	0.03	1000000000000
Supercontig_12.2:2586724:2587191:-@Supercontig_12.2:2586641|2586705:2586629:-	3'SS	0	0	0	0	0	0	0	0
Supercontig_12.2:458195:458715:-@Supercontig_12.2:457991|458183:457775:-	3'SS	0.02	0	0.03	0	0	0.01	0.02	0.04
Supercontig_12.2:4178202:4178304:+@Supercontig_12.2:4178350|4178360:4178428:+	3'SS	0	0	0	0	0	0	0	0
Supercontig_12.2:1389841:1390861:-@Supercontig_12.2:1389776|1389780:1388576:-	3'SS	0.15	0	0.55	0.44	0.19	0.81	-0.29	1.54
Supercontig_12.2:3261664:3263375:-@Supercontig_12.2:3261438|3261540:3260836:-	3'SS	0.02	0	0.05	0.04	0.01	0.09	-0.02	0.18
Supercontig_12.2:2536808:2536894:+@Supercontig_12.2:2536915|2536957:2537790:+	3'SS	0	0	0.01	0.01	0	0.01	-0.01	0
Supercontig_12.2:2725887:2726182:+@Supercontig_12.2:2726289|2726451:2726679:+	3'SS	0.01	0.01	0.01	0.02	0.01	0.02	-0.01	0
Supercontig_12.2:1047670:1049196:+@Supercontig_12.2:1049245|1049248:1049613:+	3'SS	0.14	0.05	0.27	0.17	0.1	0.29	-0.03	0.22
Supercontig_12.2:2193792:2194051:-@Supercontig_12.2:2193669|2193720:2193603:-	3'SS	0	0	0.01	0.01	0	0.01	-0.01	0
Supercontig_12.2:4400716:4400899:-@Supercontig_12.2:4400640|4400667:4399691:-	3'SS	0	0	0	0	0	0	0	0
Supercontig_12.2:4178202:4178304:+@Supercontig_12.2:4178449|4178488:4179566:+	3'SS	0.05	0.05	0.05	0.04	0.03	0.04	0.01	1000000000000
Supercontig_12.2:2705413:2706403:+@Supercontig_12.2:2706441|2706467:2706814:+	3'SS	0	0	0	0	0	0	0	0
Supercontig_12.2:1391594:1392823:-@Supercontig_12.2:1391102|1391467:1390971:-	3'SS	0.04	0.03	0.06	0.04	0.04	0.06	0	0
Supercontig_12.2:4178202:4178304:+@Supercontig_12.2:4178449|4178488:4180504:+	3'SS	0.09	0.09	0.1	0.07	0.06	0.07	0.02	1000000000000
Supercontig_12.7:1892860:1894135:+@Supercontig_12.7:1894354|1894581:1894901:+	3'SS	0.11	0.11	0.12	0.22	0.21	0.23	-0.11	1000000000000
Supercontig_12.7:1957387:1958989:+@Supercontig_12.7:1959175|1959188:1959315:+	3'SS	0.08	0	0.3	0.27	0.14	0.42	-0.19	1.88
Supercontig_12.7:1291812:1293866:-@Supercontig_12.7:1290712|1290742:1287913:-	3'SS	0.28	0.2	0.36	0.21	0.15	0.26	0.07	0.35
Supercontig_12.7:2510830:2511176:-@Supercontig_12.7:2510768|2510772:2509352:-	3'SS	0.53	0.46	0.6	0.4	0.33	0.47	0.13	3.58
Supercontig_12.7:1291812:1293866:-@Supercontig_12.7:1290712|1290742:1289027:-	3'SS	0.27	0.19	0.35	0.2	0.15	0.25	0.07	0.34
Supercontig_12.7:2713696:2713836:+@Supercontig_12.7:2713914|2713928:2714337:+	3'SS	0.01	0	0.04	0.09	0.05	0.15	-0.08	9.87
Supercontig_12.7:3286232:3287032:+@Supercontig_12.7:3287103|3287106:3288060:+	3'SS	0.09	0.04	0.16	0.1	0.05	0.17	-0.01	0.13
Supercontig_12.7:3978746:3978882:-@Supercontig_12.7:3978601|3978719:3978589:-	3'SS	0.01	0	0.01	0.03	0.02	0.05	-0.02	1.78
Supercontig_12.7:3724260:3724409:+@Supercontig_12.7:3724505|3724512:3724604:+	3'SS	0.08	0.02	0.18	0.02	0	0.06	0.06	0.26
Supercontig_12.7:2020537:2020898:-@Supercontig_12.7:2020431|2020478:2020392:-	3'SS	0	0	0	0	0	0	0	0
Supercontig_12.7:2060110:2060259:-@Supercontig_12.7:2060005|2060011:2059683:-	3'SS	0.43	0.28	0.57	0.53	0.41	0.66	-0.1	0.43
Supercontig_12.7:3909357:3909674:+@Supercontig_12.7:3909753|3909888:3910799:+	3'SS	0.05	0.05	0.05	0.08	0.07	0.08	-0.03	1000000000000
Supercontig_12.7:2602633:2603073:-@Supercontig_12.7:2602503|2602514:2602368:-	3'SS	0.12	0.05	0.2	0.09	0.03	0.15	0.03	0.15
Supercontig_12.7:2971309:2971950:-@Supercontig_12.7:2970348|2970455:2969258:-	3'SS	0.03	0.01	0.08	0.04	0.01	0.07	-0.01	0.06
Supercontig_12.7:3840654:3842052:-@Supercontig_12.7:3840573|3840585:3840322:-	3'SS	0.39	0.32	0.45	0.49	0.43	0.55	-0.1	1.04
Supercontig_12.7:3040583:3040969:+@Supercontig_12.7:3041586|3041707:3041920:+	3'SS	0.01	0	0.01	0.02	0.01	0.02	-0.01	0
Supercontig_12.7:2020392:2020431:-@Supercontig_12.7:2020163|2020299:2019778:-	3'SS	0	0	0.01	0.01	0.01	0.01	-0.01	0
Supercontig_12.7:77581:78411:-@Supercontig_12.7:77512|77552:77163:-	3'SS	0	0	0	0	0	0	0	0
Supercontig_12.7:3040583:3040969:+@Supercontig_12.7:3041681|3041707:3041920:+	3'SS	0.01	0	0.02	0.01	0	0.02	0	0
Supercontig_12.7:2030147:2030677:+@Supercontig_12.7:2030691|2030763:2031086:+	3'SS	0	0	0	0	0	0	0	0
Supercontig_12.7:2556968:2559257:+@Supercontig_12.7:2559326|2559357:2559952:+	3'SS	0.05	0.02	0.1	0.07	0.04	0.12	-0.02	0.11
Supercontig_12.7:3840654:3841748:-@Supercontig_12.7:3840573|3840585:3840322:-	3'SS	0.38	0.32	0.44	0.48	0.42	0.55	-0.1	1.06
Supercontig_12.7:2602020:2602182:-@Supercontig_12.7:2601952|2601955:2601785:-	3'SS	0.59	0.42	0.78	0.5	0.32	0.68	0.09	0.45
Supercontig_12.7:2602633:2603250:-@Supercontig_12.7:2602503|2602514:2602368:-	3'SS	0.11	0.05	0.19	0.08	0.03	0.15	0.03	0.14
Supercontig_12.7:636740:637144:-@Supercontig_12.7:636584|636670:635306:-	3'SS	0.44	0.36	0.53	0.26	0.2	0.32	0.18	73.33
Supercontig_12.7:2115224:2117594:-@Supercontig_12.7:2115051|2115166:2114483:-	3'SS	0.44	0.27	0.67	0.2	0.1	0.34	0.24	2.09
Supercontig_12.7:636740:637144:-@Supercontig_12.7:636658|636670:635306:-	3'SS	0.9	0.73	0.99	0.21	0.06	0.5	0.69	59871.1
Supercontig_12.7:1766540:1767138:-@Supercontig_12.7:1766457|1766464:1766439:-	3'SS	0.34	0.31	0.36	0.25	0.22	0.28	0.09	491
Supercontig_12.7:21506:21635:+@Supercontig_12.7:21724|21729:22170:+	3'SS	0.38	0.05	0.91	0.06	0	0.2	0.32	1.2
Supercontig_12.7:43166:43527:-@Supercontig_12.7:43092|43098:39192:-	3'SS	0.31	0.23	0.39	0.33	0.25	0.42	-0.02	0.16
Supercontig_12.7:1778699:1778926:+@Supercontig_12.7:1779070|1779370:1779966:+	3'SS	0.18	0.15	0.21	0.13	0.11	0.15	0.05	1.07
Supercontig_12.7:1892860:1894135:+@Supercontig_12.7:1894426|1894581:1894901:+	3'SS	0.13	0.12	0.13	0.23	0.23	0.24	-0.1	1000000000000
Supercontig_12.6:790795:790887:-@Supercontig_12.6:790647|790671:790553:-	3'SS	0.28	0.11	0.51	0.99	0.97	1	-0.71	1000000000000
Supercontig_12.6:1647926:1648153:-@Supercontig_12.6:1647668|1647920:1647637:-	3'SS	0.36	0.31	0.4	0.24	0.2	0.29	0.12	11.55
Supercontig_12.6:1721303:1721486:-@Supercontig_12.6:1721214|1721255:1720685:-	3'SS	0.01	0.01	0.01	0.01	0.01	0.01	0	0
Supercontig_12.6:2227422:2227608:-@Supercontig_12.6:2227288|2227325:2226356:-	3'SS	0	0	0.01	0	0	0.01	0	0
Supercontig_12.6:3987608:3987697:+@Supercontig_12.6:3987745|3987883:3988608:+	3'SS	0	0	0	0	0	0	0	0
Supercontig_12.6:3145044:3145318:+@Supercontig_12.6:3145367|3145387:3146065:+	3'SS	0.01	0	0.03	0.01	0	0.04	0	0.03
Supercontig_12.6:3155374:3156680:-@Supercontig_12.6:3155147|3155150:3151517:-	3'SS	0.2	0.14	0.28	0.13	0.07	0.2	0.07	0.37
Supercontig_12.6:1059924:1060019:-@Supercontig_12.6:1059622|1059851:1058387:-	3'SS	0.29	0.23	0.36	0.26	0.2	0.34	0.03	0.15
Supercontig_12.6:3289617:3290173:-@Supercontig_12.6:3289521|3289524:3288214:-	3'SS	0.9	0.83	0.94	0.84	0.73	0.93	0.06	0.22
Supercontig_12.6:3354388:3355088:-@Supercontig_12.6:3354131|3354136:3353034:-	3'SS	0.84	0.77	0.9	0.75	0.68	0.82	0.09	0.59
Supercontig_12.6:1535706:1535803:+@Supercontig_12.6:1535809|1535872:1535932:+	3'SS	0	0	0	0	0	0	0	0
Supercontig_12.6:824038:824597:+@Supercontig_12.6:824659|824662:826463:+	3'SS	0.54	0.49	0.59	0.47	0.43	0.52	0.07	0.42
Supercontig_12.6:3288214:3289521:-@Supercontig_12.6:3288149|3288153:3287408:-	3'SS	0.23	0.14	0.35	0.29	0.15	0.44	-0.06	0.28
Supercontig_12.6:2771476:2771573:+@Supercontig_12.6:2771634|2771640:2776604:+	3'SS	0.95	0.85	1	0.98	0.95	1	-0.03	0.11
Supercontig_12.6:169260:169769:+@Supercontig_12.6:169856|169928:171036:+	3'SS	0.04	0.02	0.07	0.01	0	0.02	0.03	0.29
Supercontig_12.6:960481:960582:+@Supercontig_12.6:960689|960764:961340:+	3'SS	0.1	0.08	0.13	0.07	0.05	0.09	0.03	0.27
Supercontig_12.6:3549:3931:+@Supercontig_12.6:4005|4014:4454:+	3'SS	0.05	0.03	0.09	0.04	0.02	0.08	0.01	0.07
Supercontig_12.6:169260:169769:+@Supercontig_12.6:169853|169928:171036:+	3'SS	0.04	0.02	0.06	0.01	0	0.03	0.03	0.18
Supercontig_12.6:1777056:1777303:+@Supercontig_12.6:1777409|1777412:1781850:+	3'SS	0.27	0.09	0.56	0.07	0	0.27	0.2	1.08
Supercontig_12.6:2031438:2031642:-@Supercontig_12.6:2031373|2031389:2029989:-	3'SS	0.83	0.71	0.93	0.94	0.84	1	-0.11	0.63
Supercontig_12.6:551176:551858:+@Supercontig_12.6:551916|551921:552313:+	3'SS	0.03	0.01	0.07	0.01	0	0.02	0.02	0.13
Supercontig_12.4:5702476:5702971:+@Supercontig_12.4:5703089|5703178:5703373:+	3'SS	0.02	0.01	0.03	0.03	0.02	0.04	-0.01	0.05
Supercontig_12.4:4559765:4560179:+@Supercontig_12.4:4560259|4560271:4562110:+	3'SS	0.17	0.05	0.35	0.73	0.39	0.93	-0.56	48.25
Supercontig_12.4:2191453:2191575:+@Supercontig_12.4:2191609|2191636:2193186:+	3'SS	0	0	0	0	0	0	0	0
Supercontig_12.4:3965642:3966077:+@Supercontig_12.4:3966146|3966231:3967867:+	3'SS	0.01	0	0.03	0.03	0.01	0.06	-0.02	0.06
Supercontig_12.4:2827380:2827608:+@Supercontig_12.4:2827670|2827685:2827800:+	3'SS	0.01	0.01	0.02	0.02	0.01	0.02	-0.01	0
Supercontig_12.4:3991264:3991433:+@Supercontig_12.4:3991501|3991504:3992073:+	3'SS	0.49	0.4	0.59	0.43	0.35	0.52	0.06	0.26
Supercontig_12.4:4140691:4140909:+@Supercontig_12.4:4141016|4141098:4142222:+	3'SS	0	0	0.01	0.01	0	0.01	-0.01	0
Supercontig_12.4:5783360:5783895:-@Supercontig_12.4:5783281|5783284:5782112:-	3'SS	0.69	0.53	0.83	0.71	0.59	0.82	-0.02	0.25
Supercontig_12.4:3709496:3709782:-@Supercontig_12.4:3709198|3709429:3708505:-	3'SS	0.01	0.01	0.02	0.01	0.01	0.02	0	0
Supercontig_12.4:4696273:4696493:+@Supercontig_12.4:4696551|4696556:4697711:+	3'SS	0	0	0	0	0	0	0	0
Supercontig_12.4:2753026:2753981:-@Supercontig_12.4:2752939|2752964:2752118:-	3'SS	0.2	0.08	0.35	0.56	0.39	0.73	-0.36	18.25
Supercontig_12.4:4340882:4341222:-@Supercontig_12.4:4340815|4340828:4340604:-	3'SS	0.14	0.03	0.31	0.22	0.06	0.42	-0.08	0.39
Supercontig_12.4:3199322:3199426:-@Supercontig_12.4:3199061|3199124:3198966:-	3'SS	0.09	0.03	0.18	0.14	0.05	0.25	-0.05	0.22
Supercontig_12.4:2382737:2383559:-@Supercontig_12.4:2382639|2382667:2382102:-	3'SS	0.06	0.03	0.09	0.06	0.03	0.11	0	0.06
Supercontig_12.4:4389473:4392563:+@Supercontig_12.4:4392613|4392625:4392727:+	3'SS	0.11	0.04	0.21	0.06	0.01	0.15	0.05	0.23
Supercontig_12.4:3978109:3978357:-@Supercontig_12.4:3978027|3978039:3977915:-	3'SS	0.01	0	0.01	0	0	0.01	0.01	0
Supercontig_12.4:4603386:4603927:+@Supercontig_12.4:4604008|4604046:4605042:+	3'SS	0.01	0.01	0.01	0.02	0.02	0.02	-0.01	1000000000000
Supercontig_12.4:2822611:2822995:+@Supercontig_12.4:2823058|2823104:2824213:+	3'SS	0.01	0	0.01	0.01	0.01	0.02	0	0
Supercontig_12.4:2271367:2271503:-@Supercontig_12.4:2271209|2271250:2270228:-	3'SS	0.51	0.44	0.58	0.4	0.33	0.48	0.11	1.17
Supercontig_12.4:4798729:4799404:-@Supercontig_12.4:4798656|4798671:4797546:-	3'SS	0.03	0.02	0.06	0.05	0.03	0.07	-0.02	0.06
Supercontig_12.4:2753026:2753981:-@Supercontig_12.4:2752939|2752959:2752118:-	3'SS	0.08	0.01	0.22	0.18	0.08	0.33	-0.1	0.47
Supercontig_12.4:2260481:2260673:-@Supercontig_12.4:2260386|2260426:2259690:-	3'SS	0.01	0	0.03	0.01	0	0.02	0	0.03
Supercontig_12.4:1571465:1571739:-@Supercontig_12.4:1571381|1571413:1571265:-	3'SS	0.04	0.01	0.08	0.03	0.01	0.07	0.01	0.06
Supercontig_12.4:4353134:4353227:+@Supercontig_12.4:4353238|4353290:4353346:+	3'SS	0	0	0	0	0	0	0	0
Supercontig_12.4:5708885:5709148:+@Supercontig_12.4:5709298|5709411:5709615:+	3'SS	0.08	0.04	0.13	0.13	0.08	0.18	-0.05	0.21
Supercontig_12.4:4418850:4419258:+@Supercontig_12.4:4419333|4419380:4419413:+	3'SS	0.25	0.1	0.48	0.25	0.04	0.64	0	0.51
Supercontig_12.4:4140691:4140909:+@Supercontig_12.4:4141002|4141098:4142222:+	3'SS	0.01	0	0.01	0	0	0.01	0.01	0
Supercontig_12.4:694872:694982:+@Supercontig_12.4:695040|695088:695605:+	3'SS	0	0	0.01	0	0	0	0	0
Supercontig_12.4:4392625:4392727:+@Supercontig_12.4:4392811|4392884:4393891:+	3'SS	0.22	0.13	0.33	0.07	0.01	0.16	0.15	1.56
Supercontig_12.4:4604046:4605042:+@Supercontig_12.4:4605137|4605439:4606442:+	3'SS	0.02	0.02	0.02	0.02	0.01	0.02	0	0
Supercontig_12.4:4529757:4529822:+@Supercontig_12.4:4529883|4529886:4532017:+	3'SS	0.1	0.07	0.14	0.15	0.11	0.19	-0.05	0.29
Supercontig_12.4:5630520:5630771:-@Supercontig_12.4:5630423|5630429:5630282:-	3'SS	0.05	0	0.2	0.32	0.08	0.57	-0.27	2.01
Supercontig_12.4:1286313:1287191:-@Supercontig_12.4:1286086|1286089:1285707:-	3'SS	0.04	0	0.13	0.09	0.01	0.28	-0.05	0.18
Supercontig_12.4:4997949:4998033:-@Supercontig_12.4:4997378|4997709:4997184:-	3'SS	0.45	0.34	0.55	0.55	0.47	0.63	-0.1	0.53
Supercontig_12.4:2219571:2219959:+@Supercontig_12.4:2220074|2220316:2222094:+	3'SS	0.01	0.01	0.02	0.01	0	0.01	0	0
Supercontig_12.4:3139658:3140144:+@Supercontig_12.4:3140154|3140220:3140717:+	3'SS	0.01	0	0.01	0.01	0	0.01	0	0
Supercontig_12.4:2058673:2058876:+@Supercontig_12.4:2058950|2059050:2059686:+	3'SS	0.01	0.01	0.02	0	0	0.01	0.01	0.1
Supercontig_12.4:4997184:4997378:-@Supercontig_12.4:4997112|4997118:4995336:-	3'SS	0.48	0.36	0.61	0.33	0.26	0.42	0.15	1.16
Supercontig_12.3:2098698:2099592:-@Supercontig_12.3:2098582|2098632:2098200:-	3'SS	0.19	0.1	0.3	0.18	0.08	0.28	0.01	0.17
Supercontig_12.3:2379374:2379553:+@Supercontig_12.3:2379696|2379869:2380225:+	3'SS	0.04	0.04	0.05	0.03	0.03	0.04	0.01	0.07
Supercontig_12.3:1239165:1239466:-@Supercontig_12.3:1239028|1239055:1238771:-	3'SS	0.01	0	0.01	0	0	0.01	0.01	0
Supercontig_12.3:1585819:1585858:-@Supercontig_12.3:1585764|1585767:1585688:-	3'SS	0	0	0	0	0	0	0	0
Supercontig_12.3:2098690:2099592:-@Supercontig_12.3:2098582|2098624:2098200:-	3'SS	0.26	0.14	0.4	0.19	0.1	0.3	0.07	0.3
Supercontig_12.3:3985588:3985762:+@Supercontig_12.3:3986466|3986509:3986695:+	3'SS	0.01	0	0.01	0.03	0.02	0.04	-0.02	6.10742e+07
Supercontig_12.3:1881250:1881458:-@Supercontig_12.3:1880806|1881052:1880471:-	3'SS	0.92	0.9	0.95	0.87	0.83	0.9	0.05	1.14
Supercontig_12.3:2079249:2079494:+@Supercontig_12.3:2079563|2079608:2079739:+	3'SS	0.34	0.27	0.42	0.21	0.13	0.28	0.13	2.9
Supercontig_12.3:3589931:3590633:+@Supercontig_12.3:3590703|3590739:3591059:+	3'SS	0.01	0	0.04	0.02	0	0.06	-0.01	0.05
Supercontig_12.3:4948092:4948227:-@Supercontig_12.3:4947934|4948001:4947876:-	3'SS	0.02	0.01	0.03	0.03	0.02	0.05	-0.01	0.07
Supercontig_12.3:2182654:2183158:+@Supercontig_12.3:2183164|2183258:2184295:+	3'SS	0	0	0	0	0	0.01	0	0
Supercontig_12.3:3878726:3878878:+@Supercontig_12.3:3878992|3879428:3879555:+	3'SS	0.28	0.25	0.3	0.17	0.16	0.19	0.11	1000000000000
Supercontig_12.3:3068459:3068998:+@Supercontig_12.3:3069066|3069084:3070313:+	3'SS	0.37	0.3	0.43	0.32	0.27	0.38	0.05	0.18
Supercontig_12.3:1128804:1129476:+@Supercontig_12.3:1129599|1129680:1130193:+	3'SS	0.05	0.02	0.08	0.08	0.04	0.13	-0.03	0.14
Supercontig_12.3:5104457:5105832:+@Supercontig_12.3:5105920|5105923:5106840:+	3'SS	0.08	0.05	0.12	0.16	0.12	0.2	-0.08	5.47
Supercontig_12.3:4175838:4176272:-@Supercontig_12.3:4175746|4175755:4175329:-	3'SS	0.74	0.68	0.79	0.7	0.66	0.74	0.04	0.14
Supercontig_12.3:2379374:2379553:+@Supercontig_12.3:2379693|2379869:2380225:+	3'SS	0.04	0.03	0.05	0.03	0.02	0.04	0.01	0.08
Supercontig_12.3:5005328:5005844:+@Supercontig_12.3:5006063|5006192:5006553:+	3'SS	0.02	0.01	0.04	0.05	0.03	0.07	-0.03	0.44
Supercontig_12.3:3878726:3878878:+@Supercontig_12.3:3878940|3879428:3879555:+	3'SS	0.3	0.28	0.32	0.17	0.16	0.19	0.13	1000000000000
Supercontig_12.3:131726:132476:-@Supercontig_12.3:131510|131525:128241:-	3'SS	0.52	0.48	0.57	0.52	0.47	0.56	0	0.08
Supercontig_12.3:3708498:3709023:+@Supercontig_12.3:3709087|3709214:3711290:+	3'SS	0.03	0.01	0.05	0.05	0.03	0.07	-0.02	0.08
Supercontig_12.3:4167329:4167933:+@Supercontig_12.3:4168001|4168008:4168080:+	3'SS	0.85	0.75	0.93	0.91	0.83	0.97	-0.06	0.24
Supercontig_12.3:1561500:1561828:-@Supercontig_12.3:1561436|1561439:1559560:-	3'SS	0.11	0.04	0.25	0.33	0.2	0.48	-0.22	4.04
Supercontig_12.3:1616864:1617257:-@Supercontig_12.3:1616403|1616811:1616212:-	3'SS	0.02	0.01	0.03	0.01	0	0.02	0.01	0
Supercontig_12.3:4150653:4150859:-@Supercontig_12.3:4150496|4150573:4150415:-	3'SS	0.16	0.14	0.17	0.17	0.15	0.19	-0.01	0.07
Supercontig_12.3:610647:611240:+@Supercontig_12.3:611290|611293:612052:+	3'SS	0.06	0.04	0.1	0.1	0.07	0.14	-0.04	0.2
Supercontig_12.3:4150653:4150859:-@Supercontig_12.3:4150496|4150559:4150415:-	3'SS	0.14	0.12	0.16	0.15	0.13	0.17	-0.01	0.04
Supercontig_12.3:2079249:2079494:+@Supercontig_12.3:2079589|2079608:2079739:+	3'SS	0.29	0.22	0.37	0.22	0.14	0.31	0.07	0.29
Supercontig_12.3:3372494:3372594:-@Supercontig_12.3:3372332|3372403:3371487:-	3'SS	0.01	0	0.04	0.01	0	0.03	0	0.03
Supercontig_12.3:1918218:1918430:+@Supercontig_12.3:1918498|1918527:1918621:+	3'SS	0	0	0	0	0	0	0	0
Supercontig_12.3:2500043:2500121:-@Supercontig_12.3:2499916|2499949:2496305:-	3'SS	0.99	0.96	1	0.99	0.96	1	0	0.03
Supercontig_12.3:1966671:1966735:-@Supercontig_12.3:1966592|1966612:1966300:-	3'SS	0	0	0	0	0	0	0	0
Supercontig_12.3:2090632:2090768:-@Supercontig_12.3:2090233|2090553:2089266:-	3'SS	0.21	0.16	0.29	0.15	0.1	0.21	0.06	0.3
Supercontig_12.3:1463501:1463879:-@Supercontig_12.3:1463428|1463496:1462668:-	3'SS	0.01	0.01	0.02	0.01	0.01	0.02	0	0
Supercontig_12.3:4132402:4133861:-@Supercontig_12.3:4132352|4132357:4131131:-	3'SS	0.04	0.01	0.09	0.01	0	0.04	0.03	0.17
Supercontig_12.3:4351128:4351260:+@Supercontig_12.3:4351295|4351321:4352229:+	3'SS	0	0	0	0	0	0	0	0
Supercontig_12.3:4532481:4532571:+@Supercontig_12.3:4532652|4532659:4535266:+	3'SS	0.63	0.46	0.79	0.67	0.51	0.8	-0.04	0.34
Supercontig_12.3:4171175:4171425:+@Supercontig_12.3:4171524|4171529:4171616:+	3'SS	0.16	0.08	0.25	0.02	0.01	0.06	0.14	26.02
Supercontig_12.3:3737675:3738205:-@Supercontig_12.3:3737593|3737596:3737361:-	3'SS	0.18	0.04	0.39	0.13	0.02	0.31	0.05	0.4
Supercontig_12.3:2713571:2714951:+@Supercontig_12.3:2715013|2715022:2715861:+	3'SS	0.1	0.02	0.26	0.47	0.28	0.66	-0.37	14.7
Supercontig_12.1:2828051:2828210:+@Supercontig_12.1:2828222|2828305:2828516:+	3'SS	0.1	0.06	0.15	0.07	0.04	0.1	0.03	0.12
Supercontig_12.1:5714030:5714835:-@Supercontig_12.1:5713947|5713982:5713676:-	3'SS	0.44	0.33	0.54	0.63	0.54	0.71	-0.19	6.6
Supercontig_12.1:3220960:3221190:-@Supercontig_12.1:3220889|3220898:3219450:-	3'SS	0.66	0.51	0.79	0.62	0.49	0.77	0.04	0.27
Supercontig_12.1:4730146:4730355:+@Supercontig_12.1:4730453|4730619:4730762:+	3'SS	0.01	0.01	0.01	0.02	0.02	0.02	-0.01	1000000000000
Supercontig_12.1:2542722:2543356:-@Supercontig_12.1:2542625|2542628:2541769:-	3'SS	0.08	0.05	0.11	0.09	0.05	0.13	-0.01	0.07
Supercontig_12.1:9626227:9626426:-@Supercontig_12.1:9626154|9626221:9626140:-	3'SS	0	0	0	0	0	0	0	0
Supercontig_12.1:7692182:7692247:-@Supercontig_12.1:7692015|7692095:7691155:-	3'SS	0.26	0.21	0.31	0.22	0.18	0.27	0.04	0.16
Supercontig_12.1:5990350:5990454:-@Supercontig_12.1:5989962|5990151:5989928:-	3'SS	0.46	0.4	0.52	0.33	0.29	0.37	0.13	41.54
Supercontig_12.1:5507423:5507599:-@Supercontig_12.1:5507363|5507392:5507053:-	3'SS	0	0	0	0	0	0	0	0
Supercontig_12.1:4860713:4860792:-@Supercontig_12.1:4860620|4860638:4859557:-	3'SS	0.09	0.05	0.14	0.37	0.31	0.44	-0.28	1000000000000
Supercontig_12.1:4562429:4562551:-@Supercontig_12.1:4562152|4562403:4561914:-	3'SS	0	0	0.01	0	0	0.01	0	0
Supercontig_12.1:4708054:4708349:-@Supercontig_12.1:4707855|4707978:4707747:-	3'SS	0.36	0.22	0.51	0.15	0.05	0.29	0.21	2.64
Supercontig_12.1:9106141:9107040:-@Supercontig_12.1:9106058|9106066:9104963:-	3'SS	0.03	0	0.06	0.01	0	0.02	0.02	0.07
Supercontig_12.1:4383972:4384139:-@Supercontig_12.1:4383518|4383745:4383077:-	3'SS	0.04	0.01	0.08	0.03	0.01	0.05	0.01	0.05
Supercontig_12.1:1897863:1897961:-@Supercontig_12.1:1897748|1897828:1896783:-	3'SS	0.01	0.01	0.01	0.01	0.01	0.02	0	0
Supercontig_12.1:821652:821800:+@Supercontig_12.1:822021|822129:822259:+	3'SS	0.1	0.09	0.12	0.07	0.06	0.08	0.03	28.03
Supercontig_12.1:1294508:1295011:+@Supercontig_12.1:1295255|1295548:1296535:+	3'SS	0.28	0.26	0.31	0.37	0.34	0.4	-0.09	2498.51
Supercontig_12.1:9685285:9685711:-@Supercontig_12.1:9684965|9685103:9681489:-	3'SS	0.03	0.01	0.06	0.08	0.04	0.13	-0.05	0.5
Supercontig_12.1:2658016:2658498:+@Supercontig_12.1:2658724|2658837:2662124:+	3'SS	0.33	0.2	0.47	0.3	0.2	0.41	0.03	0.24
Supercontig_12.1:6360409:6360697:+@Supercontig_12.1:6360774|6360797:6362512:+	3'SS	0.06	0.02	0.13	0.06	0.02	0.12	0	0.09
Supercontig_12.1:4944106:4944222:-@Supercontig_12.1:4944031|4944055:4941986:-	3'SS	0.8	0.64	0.91	0.8	0.7	0.88	0	0.23
Supercontig_12.1:6360409:6360697:+@Supercontig_12.1:6360768|6360797:6362512:+	3'SS	0.18	0.11	0.26	0.34	0.25	0.43	-0.16	3.84
Supercontig_12.1:2582565:2582985:-@Supercontig_12.1:2582365|2582368:2582211:-	3'SS	0	0	0	0	0	0.01	0	0
Supercontig_12.1:1711832:1711961:+@Supercontig_12.1:1712358|1712401:1714654:+	3'SS	0	0	0	0	0	0	0	0
Supercontig_12.1:713294:713665:-@Supercontig_12.1:712939|712958:711562:-	3'SS	0.98	0.95	1	0.99	0.96	1	-0.01	0.04
Supercontig_12.1:6143029:6143279:+@Supercontig_12.1:6143303|6143369:6143891:+	3'SS	0	0	0.01	0.01	0	0.02	-0.01	0
Supercontig_12.1:7327309:7327405:-@Supercontig_12.1:7327082|7327213:7326880:-	3'SS	0.75	0.59	0.89	0.66	0.51	0.82	0.09	0.39
Supercontig_12.1:2557689:2557833:+@Supercontig_12.1:2557876|2557941:2559159:+	3'SS	0	0	0	0	0	0	0	0
Supercontig_12.1:5477282:5477471:+@Supercontig_12.1:5477509|5477623:5478213:+	3'SS	0.01	0	0.01	0.01	0	0.01	0	0
Supercontig_12.1:9129043:9129539:+@Supercontig_12.1:9129596|9129599:9130436:+	3'SS	0.54	0.27	0.76	0.6	0.17	0.96	-0.06	0.72
Supercontig_12.1:4042791:4043224:-@Supercontig_12.1:4042716|4042725:4040620:-	3'SS	0.01	0	0.03	0.01	0	0.03	0	0
Supercontig_12.1:7956704:7957414:-@Supercontig_12.1:7956168|7956645:7955871:-	3'SS	0.46	0.41	0.51	0.48	0.43	0.53	-0.02	0.11
Supercontig_12.1:825931:826355:-@Supercontig_12.1:825431|825846:825055:-	3'SS	0.07	0.05	0.09	0.06	0.04	0.08	0.01	0.05
Supercontig_12.1:3711911:3712134:-@Supercontig_12.1:3711832|3711843:3711135:-	3'SS	0.03	0.01	0.06	0.01	0	0.03	0.02	0.05
Supercontig_12.1:6223084:6223993:+@Supercontig_12.1:6224112|6224134:6224727:+	3'SS	0.07	0.04	0.11	0.07	0.03	0.11	0	0.07
Supercontig_12.1:7913714:7913858:+@Supercontig_12.1:7913925|7914125:7916202:+	3'SS	0.28	0.23	0.34	0.29	0.24	0.34	-0.01	0.1
Supercontig_12.1:3711911:3712134:-@Supercontig_12.1:3711832|3711835:3711135:-	3'SS	0.03	0.01	0.08	0.01	0	0.05	0.02	0.07
Supercontig_12.1:7297630:7298425:+@Supercontig_12.1:7298478|7298488:7298722:+	3'SS	0.05	0	0.18	0.07	0.01	0.21	-0.02	0.16
Supercontig_12.1:1897863:1897961:-@Supercontig_12.1:1897748|1897836:1896783:-	3'SS	0.01	0.01	0.01	0.01	0.01	0.02	0	0
Supercontig_12.1:4596091:4596925:-@Supercontig_12.1:4595979|4595985:4595833:-	3'SS	0.33	0.14	0.59	0.4	0.22	0.58	-0.07	0.42
Supercontig_12.1:4259365:4261511:-@Supercontig_12.1:4259264|4259287:4258279:-	3'SS	0.41	0.31	0.51	0.44	0.35	0.53	-0.03	0.18
Supercontig_12.1:7714560:7714979:+@Supercontig_12.1:7715723|7715726:7715931:+	3'SS	0.03	0	0.1	0.03	0	0.08	0	0.07
Supercontig_12.1:9628621:9628740:+@Supercontig_12.1:9628794|9628807:9629777:+	3'SS	0.02	0.01	0.03	0	0	0.01	0.02	0.1
Supercontig_12.1:2555217:2555289:-@Supercontig_12.1:2555001|2555097:2554168:-	3'SS	0.06	0.04	0.09	0.04	0.02	0.06	0.02	0.15
Supercontig_12.1:2658016:2658498:+@Supercontig_12.1:2658724|2658848:2662124:+	3'SS	0.59	0.39	0.86	0.32	0.22	0.46	0.27	2.87
Supercontig_12.1:8510082:8510584:+@Supercontig_12.1:8510638|8510656:8511531:+	3'SS	0.02	0.01	0.03	0	0	0.01	0.02	0.17
Supercontig_12.1:3548507:3549019:-@Supercontig_12.1:3548322|3548501:3545195:-	3'SS	0.04	0.02	0.06	0.03	0.02	0.05	0.01	0.04
Supercontig_12.1:7377669:7377867:+@Supercontig_12.1:7377977|7378115:7378932:+	3'SS	0.05	0.02	0.1	0.06	0.03	0.1	-0.01	0.08
Supercontig_12.1:9415163:9416372:+@Supercontig_12.1:9416706|9416931:9417041:+	3'SS	0.03	0.02	0.05	0.02	0.01	0.03	0.01	0.17
Supercontig_12.1:6540857:6541057:+@Supercontig_12.1:6541205|6541251:6541327:+	3'SS	0	0	0	0	0	0	0	0
Supercontig_12.1:3182599:3182982:+@Supercontig_12.1:3183030|3183053:3183354:+	3'SS	0	0	0.01	0	0	0.01	0	0
Supercontig_12.1:2674481:2675121:+@Supercontig_12.1:2675205|2676464:2676586:+	3'SS	0.61	0.59	0.63	0.52	0.5	0.54	0.09	4.83448e+11
Supercontig_12.1:3670638:3670893:-@Supercontig_12.1:3670538|3670571:3670427:-	3'SS	0.21	0.13	0.29	0.05	0.02	0.11	0.16	19.78
Supercontig_12.1:7743196:7743591:-@Supercontig_12.1:7743103|7743164:7743017:-	3'SS	0	0	0	0	0	0	0	0
Supercontig_12.1:2904998:2905374:-@Supercontig_12.1:2904742|2904936:2904595:-	3'SS	0.26	0.24	0.27	0.24	0.23	0.26	0.02	0.07
Supercontig_12.1:5548548:5548763:+@Supercontig_12.1:5548935|5549053:5549182:+	3'SS	0.38	0.3	0.47	0.31	0.24	0.39	0.07	0.33
Supercontig_12.1:2839279:2840420:-@Supercontig_12.1:2839222|2839225:2838364:-	3'SS	0.32	0.25	0.4	0.24	0.18	0.29	0.08	0.59
Supercontig_12.1:3124238:3124887:-@Supercontig_12.1:3124057|3124161:3123978:-	3'SS	0.21	0.15	0.28	0.21	0.16	0.27	0	0.11
Supercontig_12.1:3268503:3268728:+@Supercontig_12.1:3268827|3268852:3269533:+	3'SS	0.11	0.11	0.12	0.04	0.04	0.05	0.07	1000000000000
Supercontig_12.1:7312111:7312186:+@Supercontig_12.1:7312360|7312363:7313315:+	3'SS	0.07	0.04	0.1	0.09	0.06	0.14	-0.02	0.11
Supercontig_12.1:8386757:8387224:-@Supercontig_12.1:8386662|8386670:8386645:-	3'SS	0	0	0.01	0	0	0.01	0	0
Supercontig_12.1:3268235:3268374:+@Supercontig_12.1:3268767|3268852:3269533:+	3'SS	0.24	0.22	0.26	0.07	0.07	0.08	0.17	1000000000000
Supercontig_12.1:6143029:6143279:+@Supercontig_12.1:6143303|6143369:6143778:+	3'SS	0	0	0.01	0.01	0	0.02	-0.01	0
Supercontig_12.1:1135809:1135988:-@Supercontig_12.1:1135708|1135803:1135557:-	3'SS	0	0	0	0	0	0	0	0
Supercontig_12.1:825931:826355:-@Supercontig_12.1:825434|825846:825055:-	3'SS	0.03	0.02	0.04	0.07	0.05	0.08	-0.04	4.99
Supercontig_12.1:2006192:2006615:-@Supercontig_12.1:2005923|2005926:2005123:-	3'SS	0.47	0.38	0.58	0.39	0.29	0.5	0.08	0.37
Supercontig_12.1:4946283:4946802:+@Supercontig_12.1:4946857|4946885:4947993:+	3'SS	0.42	0.28	0.55	0.42	0.3	0.54	0	0.24
Supercontig_12.1:8650857:8650963:+@Supercontig_12.1:8650969|8651049:8652016:+	3'SS	0.07	0.06	0.09	0.02	0	0.04	0.05	123.22
Supercontig_12.1:4107436:4107966:+@Supercontig_12.1:4108024|4108064:4108145:+	3'SS	0.06	0	0.19	0.63	0.38	0.84	-0.57	9972.8
Supercontig_12.1:1807507:1807834:-@Supercontig_12.1:1807058|1807061:1806205:-	3'SS	0.24	0.1	0.44	0.32	0.03	0.75	-0.08	0.56
Supercontig_12.1:3371321:3371631:+@Supercontig_12.1:3371695|3371704:3372588:+	3'SS	0.15	0.12	0.17	0.19	0.17	0.21	-0.04	0.88
Supercontig_12.1:1309338:1309575:-@Supercontig_12.1:1309242|1309245:1308054:-	3'SS	0.59	0.49	0.68	0.57	0.48	0.65	0.02	0.17
Supercontig_12.1:7622647:7622899:-@Supercontig_12.1:7622425|7622499:7621952:-	3'SS	0.01	0.01	0.02	0.01	0.01	0.02	0	0
Supercontig_12.1:7243236:7243502:+@Supercontig_12.1:7243554|7243557:7244076:+	3'SS	0.51	0.47	0.55	0.49	0.47	0.52	0.02	0.07
Supercontig_12.1:9415163:9416372:+@Supercontig_12.1:9416703|9416931:9417041:+	3'SS	0.03	0.02	0.05	0.02	0.01	0.03	0.01	0.16
Supercontig_12.1:3267908:3268044:+@Supercontig_12.1:3268192|3268235:3268374:+	3'SS	0	0	0	0.02	0.01	0.02	-0.02	1000000000000
Supercontig_12.1:7692182:7692821:-@Supercontig_12.1:7692015|7692095:7691795:-	3'SS	0.3	0.25	0.35	0.27	0.22	0.32	0.03	0.13
Supercontig_12.1:5403228:5403808:+@Supercontig_12.1:5403853|5403872:5404005:+	3'SS	0	0	0	0	0	0	0	0
Supercontig_12.1:8597651:8597765:+@Supercontig_12.1:8597804|8597855:8600523:+	3'SS	0.01	0	0.03	0	0	0.01	0.01	0
Supercontig_12.1:3523879:3524258:-@Supercontig_12.1:3523824|3523827:3523672:-	3'SS	0.61	0.51	0.71	0.55	0.46	0.63	0.06	0.29
Supercontig_12.1:3268235:3268374:+@Supercontig_12.1:3268410|3268503:3268728:+	3'SS	0.01	0	0.01	0	0	0	0.01	0
Supercontig_12.1:6206374:6206605:+@Supercontig_12.1:6206611|6206672:6208245:+	3'SS	0	0	0.01	0.02	0.01	0.03	-0.02	1.9
Supercontig_12.1:8356468:8356710:-@Supercontig_12.1:8356269|8356272:8355848:-	3'SS	0.44	0.36	0.51	0.03	0	0.07	0.41	1000000000000
Supercontig_12.1:9635625:9636246:+@Supercontig_12.1:9636305|9636418:9638039:+	3'SS	0.35	0.27	0.44	0.55	0.46	0.64	-0.2	7.46
Supercontig_12.1:9279981:9280151:-@Supercontig_12.1:9279693|9279926:9279336:-	3'SS	0.02	0.01	0.02	0.01	0.01	0.01	0.01	0
Supercontig_12.1:4730146:4730355:+@Supercontig_12.1:4730469|4730619:4730762:+	3'SS	0.01	0.01	0.01	0.02	0.02	0.02	-0.01	1000000000000
Supercontig_12.1:9058866:9059057:-@Supercontig_12.1:9058702|9058740:9058557:-	3'SS	0.22	0.21	0.24	0.2	0.19	0.22	0.02	0.18
Supercontig_12.1:8180885:8181225:+@Supercontig_12.1:8181280|8181289:8181353:+	3'SS	0.29	0.09	0.52	0.09	0	0.31	0.2	0.93
Supercontig_12.1:4730619:4730762:+@Supercontig_12.1:4730772|4730994:4732057:+	3'SS	0	0	0	0	0	0	0	0
Supercontig_12.1:3268235:3268374:+@Supercontig_12.1:3268820|3268852:3269533:+	3'SS	0.59	0.55	0.63	0.18	0.16	0.2	0.41	1000000000000
Supercontig_12.1:1950860:1951486:-@Supercontig_12.1:1950793|1950805:1948134:-	3'SS	0.32	0.22	0.42	0.48	0.38	0.59	-0.16	1.86
Supercontig_12.1:4708054:4708349:-@Supercontig_12.1:4707471|4707978:4706182:-	3'SS	0.18	0.13	0.23	0.13	0.09	0.18	0.05	0.18
Supercontig_12.1:1174476:1176506:-@Supercontig_12.1:1174292|1174417:1173993:-	3'SS	0.1	0.05	0.17	0.2	0.13	0.28	-0.1	1.03
Supercontig_12.1:1233096:1233245:+@Supercontig_12.1:1233320|1233674:1234259:+	3'SS	0.01	0.01	0.01	0.02	0.02	0.03	-0.01	54.24
Supercontig_12.1:5728448:5728917:-@Supercontig_12.1:5728329|5728442:5727235:-	3'SS	0.01	0.01	0.01	0.01	0.01	0.01	0	0
Supercontig_12.1:2464154:2464277:+@Supercontig_12.1:2464380|2464557:2464725:+	3'SS	0.37	0.31	0.45	0.97	0.88	1	-0.6	1000000000000
Supercontig_12.1:4954141:4954319:+@Supercontig_12.1:4954370|4954415:4955119:+	3'SS	0.11	0.05	0.18	0.09	0.04	0.16	0.02	0.13
Supercontig_12.1:8805901:8809757:+@Supercontig_12.1:8809817|8809820:8811073:+	3'SS	0.05	0.02	0.08	0.02	0	0.05	0.03	0.15
Supercontig_12.5:5715171:5715764:+@Supercontig_12.5:5715828|5716231:5716250:+	3'SS	0.05	0.05	0.06	0.05	0.05	0.06	0	0
Supercontig_12.5:6362725:6362862:-@Supercontig_12.5:6362651|6362654:6362123:-	3'SS	0.42	0.03	0.89	0.3	0.05	0.68	0.12	0.83
Supercontig_12.5:2143107:2143294:+@Supercontig_12.5:2143349|2143387:2144554:+	3'SS	0	0	0	0	0	0	0	0
Supercontig_12.5:3086987:3087348:-@Supercontig_12.5:3086781|3086981:3086029:-	3'SS	0.05	0.04	0.06	0.03	0.02	0.04	0.02	2.61
Supercontig_12.5:5133223:5133901:+@Supercontig_12.5:5134336|5134395:5134798:+	3'SS	0.89	0.79	0.98	0.61	0.51	0.7	0.28	3419.17
Supercontig_12.5:3285729:3285864:+@Supercontig_12.5:3286115|3286177:3286435:+	3'SS	0	0	0	0.01	0	0.01	-0.01	0
Supercontig_12.5:3349052:3349376:+@Supercontig_12.5:3349614|3349656:3350341:+	3'SS	0.04	0.01	0.07	0.05	0.03	0.09	-0.01	0.08
Supercontig_12.5:4395750:4395860:-@Supercontig_12.5:4395675|4395738:4393869:-	3'SS	0.02	0.02	0.03	0.02	0.02	0.03	0	0
Supercontig_12.5:5847578:5847760:-@Supercontig_12.5:5847391|5847572:5846121:-	3'SS	0.03	0.03	0.03	0.03	0.02	0.03	0	0
Supercontig_12.5:1502164:1502329:-@Supercontig_12.5:1502084|1502087:1501026:-	3'SS	0.13	0.09	0.18	0.09	0.06	0.13	0.04	0.2
Supercontig_12.5:3059954:3060833:+@Supercontig_12.5:3060887|3060896:3061201:+	3'SS	0.41	0.32	0.51	0.48	0.39	0.57	-0.07	0.3
Supercontig_12.5:4733705:4733934:-@Supercontig_12.5:4733639|4733642:4733406:-	3'SS	0.2	0.09	0.3	0.29	0.17	0.43	-0.09	0.41
Supercontig_12.5:4008998:4009736:-@Supercontig_12.5:4008598|4008627:4007434:-	3'SS	0.1	0.08	0.11	0.08	0.07	0.09	0.02	0.07
Supercontig_12.5:2143107:2143294:+@Supercontig_12.5:2143312|2143387:2144554:+	3'SS	0	0	0	0	0	0	0	0
Supercontig_12.5:4781437:4781996:+@Supercontig_12.5:4782052|4782055:4782116:+	3'SS	0.59	0.13	0.99	0.29	0.03	0.73	0.3	1.04
Supercontig_12.5:1910218:1910346:-@Supercontig_12.5:1910114|1910188:1909771:-	3'SS	0	0	0	0	0	0	0	0
Supercontig_12.5:4434466:4435303:+@Supercontig_12.5:4435365|4435441:4441314:+	3'SS	0.08	0.03	0.19	0.08	0.03	0.15	0	0.1
Supercontig_12.5:2352498:2353154:-@Supercontig_12.5:2352431|2352435:2352247:-	3'SS	0.36	0.11	0.65	0.32	0.13	0.56	0.04	0.46
Supercontig_12.5:3112717:3112892:+@Supercontig_12.5:3112957|3112960:3114480:+	3'SS	0.05	0.02	0.1	0.1	0.05	0.18	-0.05	0.27
Supercontig_12.5:4008998:4009736:-@Supercontig_12.5:4008742|4008975:4008660:-	3'SS	0	0	0	0	0	0	0	0
Supercontig_12.5:46676:46987:+@Supercontig_12.5:47006|47147:50446:+	3'SS	0.3	0.24	0.37	0.33	0.27	0.39	-0.03	0.14
Supercontig_12.5:3473748:3474214:-@Supercontig_12.5:3473326|3473669:3472461:-	3'SS	0.01	0.01	0.02	0.01	0.01	0.02	0	0
Supercontig_12.5:807186:807565:+@Supercontig_12.5:807642|807681:809668:+	3'SS	0.01	0	0.02	0.05	0.03	0.08	-0.04	194.68
Supercontig_12.5:1478273:1478569:-@Supercontig_12.5:1478070|1478073:1474985:-	3'SS	0.49	0.29	0.66	0.38	0.26	0.51	0.11	0.49
Supercontig_12.5:2256127:2256313:-@Supercontig_12.5:2255842|2256064:2255743:-	3'SS	0.01	0.01	0.01	0.01	0.01	0.01	0	0
Supercontig_12.5:2968904:2972023:+@Supercontig_12.5:2972092|2972097:2974291:+	3'SS	0.89	0.79	0.96	0.86	0.77	0.93	0.03	0.18
Supercontig_12.5:515220:517062:-@Supercontig_12.5:515143|515149:513513:-	3'SS	0.02	0	0.05	0.07	0.03	0.12	-0.05	0.26
Supercontig_12.5:6352180:6352771:+@Supercontig_12.5:6352976|6352998:6353614:+	3'SS	0.09	0.07	0.11	0.05	0.03	0.06	0.04	8.41
Supercontig_12.5:6366073:6366400:+@Supercontig_12.5:6366462|6366467:6366932:+	3'SS	0.6	0.41	0.75	0.45	0.22	0.68	0.15	0.64
Supercontig_12.5:3877448:3877856:-@Supercontig_12.5:3877363|3877393:3876204:-	3'SS	0.04	0.01	0.09	0.06	0.02	0.12	-0.02	0.1
Supercontig_12.5:3370915:3371351:+@Supercontig_12.5:3371420|3371423:3372733:+	3'SS	0.04	0.02	0.07	0.01	0	0.02	0.03	0.41
Supercontig_12.5:5715171:5715764:+@Supercontig_12.5:5715797|5716231:5716250:+	3'SS	0.06	0.05	0.07	0.06	0.05	0.07	0	0
Supercontig_12.5:807186:807565:+@Supercontig_12.5:807639|807681:809668:+	3'SS	0.02	0.01	0.03	0.05	0.03	0.07	-0.03	0.48
Supercontig_12.5:4877414:4878046:-@Supercontig_12.5:4877275|4877301:4876418:-	3'SS	0.01	0	0.02	0	0	0.01	0.01	0
Supercontig_12.5:5558713:5559187:+@Supercontig_12.5:5559355|5559466:5559516:+	3'SS	0	0	0	0	0	0	0	0
Supercontig_12.5:3295748:3295874:-@Supercontig_12.5:3295687|3295742:3295599:-	3'SS	0	0	0	0	0	0	0	0
Supercontig_12.5:4356825:4357808:+@Supercontig_12.5:4357883|4357889:4358729:+	3'SS	0	0	0.01	0	0	0.01	0	0
Supercontig_12.5:3285729:3285864:+@Supercontig_12.5:3286141|3286177:3286435:+	3'SS	0	0	0	0.01	0.01	0.01	-0.01	0
Supercontig_12.5:272064:272766:-@Supercontig_12.5:271980|272004:271190:-	3'SS	0.01	0	0.02	0.01	0	0.02	0	0
Supercontig_12.5:390787:391507:+@Supercontig_12.5:391636|391662:392849:+	3'SS	0.03	0.02	0.05	0.05	0.03	0.08	-0.02	0.12
Supercontig_12.5:4693733:4694477:-@Supercontig_12.5:4693519|4693668:4693449:-	3'SS	0.2	0.14	0.26	0.07	0.04	0.12	0.13	16.89
Supercontig_12.5:4352308:4353052:-@Supercontig_12.5:4352094|4352251:4350372:-	3'SS	0.07	0.03	0.13	0.06	0.03	0.11	0.01	0.08
Supercontig_12.5:220957:221235:+@Supercontig_12.5:221241|221299:221421:+	3'SS	0	0	0	0	0	0	0	0
Supercontig_12.5:2346423:2346561:+@Supercontig_12.5:2346573|2346640:2346696:+	3'SS	0.01	0	0.02	0.01	0	0.01	0	0
Supercontig_12.5:4781437:4781996:+@Supercontig_12.5:4782055|4782236:4783164:+	3'SS	0.58	0.57	0.6	0.57	0.55	0.59	0.01	0.07
Supercontig_12.5:1529267:1529694:+@Supercontig_12.5:1529807|1529847:1532399:+	3'SS	0.16	0.1	0.24	0.09	0.04	0.15	0.07	0.31
Supercontig_12.5:4723233:4723464:-@Supercontig_12.5:4723099|4723124:4722989:-	3'SS	0	0	0.01	0	0	0	0	0
Supercontig_12.5:3059954:3060833:+@Supercontig_12.5:3060893|3060896:3061201:+	3'SS	0.35	0.26	0.45	0.31	0.21	0.4	0.04	0.22
Supercontig_12.5:6247448:6248638:+@Supercontig_12.5:6248645|6248723:6250397:+	3'SS	0	0	0.01	0	0	0.01	0	0
Supercontig_12.5:4260305:4260380:-@Supercontig_12.5:4260218|4260253:4259807:-	3'SS	0.05	0.03	0.08	0.07	0.05	0.1	-0.02	0.07
Supercontig_12.5:5389302:5389969:+@Supercontig_12.5:5390541|5390679:5394472:+	3'SS	0.84	0.76	0.91	0.73	0.66	0.81	0.11	0.88
Supercontig_12.5:2264917:2265618:-@Supercontig_12.5:2264745|2264782:2263419:-	3'SS	0.04	0.02	0.07	0.01	0	0.03	0.03	0.33
Supercontig_12.5:3349052:3349376:+@Supercontig_12.5:3349502|3349656:3350341:+	3'SS	0.05	0.03	0.08	0.03	0.01	0.06	0.02	0.07
Supercontig_12.5:1911077:1911233:+@Supercontig_12.5:1911355|1911384:1911517:+	3'SS	0.09	0.01	0.26	0.56	0.34	0.75	-0.47	2048.08
Supercontig_12.5:2547040:2547532:+@Supercontig_12.5:2547587|2547594:2549208:+	3'SS	0.91	0.74	1	0.39	0.14	0.62	0.52	236.12
Supercontig_12.5:3086987:3087348:-@Supercontig_12.5:3086781|3086910:3086029:-	3'SS	0.06	0.05	0.07	0.03	0.02	0.04	0.03	5.8
Supercontig_12.5:1899722:1899838:-@Supercontig_12.5:1899660|1899665:1899537:-	3'SS	0.02	0	0.05	0.1	0.06	0.15	-0.08	3.01
Supercontig_12.5:4024029:4024483:+@Supercontig_12.5:4024611|4024879:4025087:+	3'SS	0.01	0.01	0.02	0.03	0.02	0.04	-0.02	1.3
Supercontig_12.5:4008998:4009736:-@Supercontig_12.5:4008742|4008964:4008660:-	3'SS	0	0	0	0	0	0	0	0
Supercontig_12.5:4207449:4208188:-@Supercontig_12.5:4207384|4207393:4207276:-	3'SS	0.31	0.25	0.37	0.31	0.24	0.38	0	0.12
Supercontig_12.5:4885606:4885861:-@Supercontig_12.5:4885045|4885331:4879246:-	3'SS	0.36	0.26	0.46	0.61	0.48	0.75	-0.25	12.08
Supercontig_12.5:1916797:1916959:-@Supercontig_12.5:1916742|1916745:1916638:-	3'SS	0.42	0.35	0.5	0.28	0.2	0.37	0.14	2.41
Supercontig_12.5:2217230:2217601:+@Supercontig_12.5:2217718|2217721:2219221:+	3'SS	0.26	0.23	0.29	0.26	0.22	0.29	0	0.06
Supercontig_12.2:521494:521999:+@Supercontig_12.2:522599:522877:+@Supercontig_12.2:522976:523164:+	Exon skipping	1	0.99	1	1	0.99	1	0	0
Supercontig_12.2:2086281:2086318:-@Supercontig_12.2:2085624:2085983:-@Supercontig_12.2:2084680:2085537:-	Exon skipping	1	1	1	1	1	1	0	0
Supercontig_12.2:3016869:3017314:+@Supercontig_12.2:3017410:3017420:+@Supercontig_12.2:3017775:3017961:+	Exon skipping	1	1	1	0.27	0.21	0.33	0.73	1000000000000
Supercontig_12.2:4178202:4178304:+@Supercontig_12.2:4178360:4178428:+@Supercontig_12.2:4178488:4180504:+	Exon skipping	1	1	1	1	1	1	0	0
Supercontig_12.2:4317187:4317667:+@Supercontig_12.2:4317746:4317769:+@Supercontig_12.2:4317844:4318036:+	Exon skipping	0.71	0.58	0.82	0.7	0.57	0.82	0.01	0.25
Supercontig_12.2:3971221:3971365:-@Supercontig_12.2:3971117:3971167:-@Supercontig_12.2:3969678:3970992:-	Exon skipping	0.99	0.98	1	0.99	0.98	1	0	0
Supercontig_12.2:3113294:3113586:-@Supercontig_12.2:3112745:3112831:-@Supercontig_12.2:3112459:3112621:-	Exon skipping	0.99	0.98	1	1	0.98	1	-0.01	0
Supercontig_12.2:2100710:2102457:-@Supercontig_12.2:2098900:2100654:-@Supercontig_12.2:2097643:2098837:-	Exon skipping	1	1	1	1	1	1	0	0
Supercontig_12.2:2481215:2481301:+@Supercontig_12.2:2481444:2481537:+@Supercontig_12.2:2481790:2481946:+	Exon skipping	1	0.99	1	0.99	0.99	0.99	0.01	0
Supercontig_12.2:1960777:1961485:-@Supercontig_12.2:1960582:1960717:-@Supercontig_12.2:1959501:1960509:-	Exon skipping	0.97	0.92	1	0.99	0.97	1	-0.02	0.05
Supercontig_12.2:1786424:1786565:-@Supercontig_12.2:1786116:1786194:-@Supercontig_12.2:1785833:1785989:-	Exon skipping	1	1	1	1	1	1	0	0
Supercontig_12.2:3180104:3180408:+@Supercontig_12.2:3180971:3181101:+@Supercontig_12.2:3181176:3182245:+	Exon skipping	1	1	1	1	1	1	0	0
Supercontig_12.2:2401518:2401910:-@Supercontig_12.2:2401324:2401377:-@Supercontig_12.2:2400757:2401183:-	Exon skipping	0.86	0.83	0.9	0.81	0.78	0.85	0.05	0.62
Supercontig_12.2:2458313:2458516:-@Supercontig_12.2:2456390:2458179:-@Supercontig_12.2:2455889:2456100:-	Exon skipping	1	1	1	1	1	1	0	0
Supercontig_12.2:3301296:3301459:-@Supercontig_12.2:3301057:3301169:-@Supercontig_12.2:3300528:3300691:-	Exon skipping	0.52	0.42	0.63	0.69	0.62	0.75	-0.17	4.67
Supercontig_12.2:1612055:1612209:+@Supercontig_12.2:1612367:1612381:+@Supercontig_12.2:1612483:1612568:+	Exon skipping	0.2	0.16	0.25	0.34	0.3	0.39	-0.14	6604.71
Supercontig_12.2:2088935:2089047:-@Supercontig_12.2:2088697:2088760:-@Supercontig_12.2:2088258:2088616:-	Exon skipping	1	1	1	1	1	1	0	0
Supercontig_12.2:2394820:2394849:+@Supercontig_12.2:2395687:2395851:+@Supercontig_12.2:2395911:2397574:+	Exon skipping	1	1	1	1	1	1	0	0
Supercontig_12.2:1785833:1785989:-@Supercontig_12.2:1785751:1785774:-@Supercontig_12.2:1785031:1785680:-	Exon skipping	1	1	1	1	1	1	0	0
Supercontig_12.2:4178202:4178304:+@Supercontig_12.2:4178360:4178428:+@Supercontig_12.2:4178488:4180433:+	Exon skipping	1	1	1	1	1	1	0	0
Supercontig_12.2:2805586:2805640:+@Supercontig_12.2:2805707:2805789:+@Supercontig_12.2:2805851:2806211:+	Exon skipping	0.81	0.73	0.88	0.69	0.6	0.78	0.12	0.82
Supercontig_12.2:2266974:2267203:+@Supercontig_12.2:2267301:2267374:+@Supercontig_12.2:2267704:2268040:+	Exon skipping	1	1	1	1	1	1	0	0
Supercontig_12.2:4401667:4401916:+@Supercontig_12.2:4402071:4402280:+@Supercontig_12.2:4402375:4403088:+	Exon skipping	1	1	1	1	1	1	0	0
Supercontig_12.2:2794864:2795200:-@Supercontig_12.2:2794626:2794757:-@Supercontig_12.2:2792898:2794546:-	Exon skipping	0.3	0.2	0.44	0.33	0.23	0.44	-0.03	0.23
Supercontig_12.2:4178202:4178304:+@Supercontig_12.2:4178360:4178428:+@Supercontig_12.2:4178488:4179566:+	Exon skipping	1	1	1	1	1	1	0	0
Supercontig_12.2:3106726:3106980:-@Supercontig_12.2:3106464:3106539:-@Supercontig_12.2:3106297:3106357:-	Exon skipping	1	1	1	1	1	1	0	0
Supercontig_12.7:3908479:3908716:+@Supercontig_12.7:3909043:3909080:+@Supercontig_12.7:3909153:3909279:+	Exon skipping	1	1	1	1	1	1	0	0
Supercontig_12.7:2618756:2619531:-@Supercontig_12.7:2618474:2618502:-@Supercontig_12.7:2617691:2618006:-	Exon skipping	1	0.99	1	1	1	1	0	0
Supercontig_12.7:2488158:2488439:-@Supercontig_12.7:2487743:2488035:-@Supercontig_12.7:2487192:2487678:-	Exon skipping	1	1	1	1	1	1	0	0
Supercontig_12.7:685631:685916:-@Supercontig_12.7:685347:685493:-@Supercontig_12.7:684215:685248:-	Exon skipping	1	1	1	1	1	1	0	0
Supercontig_12.7:2700694:2701786:+@Supercontig_12.7:2701957:2702119:+@Supercontig_12.7:2702182:2703326:+	Exon skipping	0.99	0.97	1	0.97	0.95	0.99	0.02	0.07
Supercontig_12.7:2619509:2620094:-@Supercontig_12.7:2618474:2618502:-@Supercontig_12.7:2617691:2618006:-	Exon skipping	1	0.99	1	0.99	0.98	0.99	0.01	0
Supercontig_12.7:3891835:3892104:+@Supercontig_12.7:3892343:3892493:+@Supercontig_12.7:3892565:3894015:+	Exon skipping	1	1	1	1	1	1	0	0
Supercontig_12.7:3170912:3171193:+@Supercontig_12.7:3171569:3171653:+@Supercontig_12.7:3171962:3172063:+	Exon skipping	0.93	0.81	0.98	0.89	0.72	1	0.04	0.2
Supercontig_12.7:2491125:2491196:+@Supercontig_12.7:2491252:2491339:+@Supercontig_12.7:2491408:2492335:+	Exon skipping	1	1	1	1	1	1	0	0
Supercontig_12.7:47166:47298:+@Supercontig_12.7:47394:47460:+@Supercontig_12.7:47572:48471:+	Exon skipping	0.84	0.75	0.92	0.99	0.96	1	-0.15	65.94
Supercontig_12.7:2490608:2490983:+@Supercontig_12.7:2491125:2491196:+@Supercontig_12.7:2491252:2491339:+	Exon skipping	0.89	0.87	0.9	1	1	1	-0.11	1000000000000
Supercontig_12.7:3799077:3799251:+@Supercontig_12.7:3799709:3799799:+@Supercontig_12.7:3799881:3800495:+	Exon skipping	1	1	1	1	1	1	0	0
Supercontig_12.7:3978746:3978882:-@Supercontig_12.7:3978589:3978601:-@Supercontig_12.7:3978095:3978527:-	Exon skipping	1	0.99	1	0.02	0	0.07	0.98	1000000000000
Supercontig_12.7:2907428:2907645:+@Supercontig_12.7:2907757:2907774:+@Supercontig_12.7:2907968:2908134:+	Exon skipping	0	0	0.01	0.01	0	0.02	-0.01	0
Supercontig_12.7:2719356:2719497:+@Supercontig_12.7:2719563:2719721:+@Supercontig_12.7:2719785:2720120:+	Exon skipping	0.99	0.99	1	0.99	0.99	1	0	0
Supercontig_12.7:778723:779246:-@Supercontig_12.7:778562:778592:-@Supercontig_12.7:777642:778499:-	Exon skipping	0.99	0.99	1	1	0.99	1	-0.01	0
Supercontig_12.7:2619509:2619946:-@Supercontig_12.7:2618474:2618502:-@Supercontig_12.7:2617691:2618006:-	Exon skipping	0.99	0.99	1	0.99	0.98	0.99	0	0
Supercontig_12.7:2486261:2486630:+@Supercontig_12.7:2486695:2486827:+@Supercontig_12.7:2486885:2486963:+	Exon skipping	1	1	1	1	1	1	0	0
Supercontig_12.7:1766540:1766702:-@Supercontig_12.7:1766439:1766464:-@Supercontig_12.7:1765151:1766109:-	Exon skipping	1	1	1	1	1	1	0	0
Supercontig_12.7:2620208:2620447:-@Supercontig_12.7:2619509:2619946:-@Supercontig_12.7:2618474:2618502:-	Exon skipping	1	0.99	1	1	1	1	0	0
Supercontig_12.7:1766540:1767138:-@Supercontig_12.7:1766439:1766457:-@Supercontig_12.7:1765151:1766109:-	Exon skipping	1	1	1	1	1	1	0	0
Supercontig_12.7:3598140:3598838:+@Supercontig_12.7:3599021:3599155:+@Supercontig_12.7:3599372:3599747:+	Exon skipping	0.99	0.98	1	0.9	0.84	0.95	0.09	222.54
Supercontig_12.7:2490608:2490983:+@Supercontig_12.7:2491125:2491196:+@Supercontig_12.7:2491408:2492335:+	Exon skipping	1	1	1	1	1	1	0	0
Supercontig_12.7:2618474:2619531:-@Supercontig_12.7:2617691:2618006:-@Supercontig_12.7:2617579:2617631:-	Exon skipping	1	1	1	1	1	1	0	0
Supercontig_12.7:2030147:2030677:+@Supercontig_12.7:2030763:2031086:+@Supercontig_12.7:2031171:2032152:+	Exon skipping	1	1	1	1	1	1	0	0
Supercontig_12.7:1841954:1842170:+@Supercontig_12.7:1842256:1842596:+@Supercontig_12.7:1842797:1843043:+	Exon skipping	1	0.99	1	1	0.99	1	0	0
Supercontig_12.7:2490608:2490983:+@Supercontig_12.7:2491252:2491339:+@Supercontig_12.7:2491408:2492335:+	Exon skipping	0.94	0.92	0.95	1	1	1	-0.06	1000000000000
Supercontig_12.7:2950910:2951389:-@Supercontig_12.7:2950702:2950844:-@Supercontig_12.7:2948481:2950578:-	Exon skipping	0.04	0.02	0.09	0.01	0	0.03	0.03	0.18
Supercontig_12.6:2119204:2119337:-@Supercontig_12.6:2118912:2119038:-@Supercontig_12.6:2118022:2118823:-	Exon skipping	1	1	1	1	1	1	0	0
Supercontig_12.6:4021891:4022542:-@Supercontig_12.6:4021659:4021751:-@Supercontig_12.6:4020776:4021578:-	Exon skipping	0.96	0.89	1	0.98	0.94	1	-0.02	0.09
Supercontig_12.6:758747:758822:+@Supercontig_12.6:758898:759324:+@Supercontig_12.6:759387:760380:+	Exon skipping	0.85	0.84	0.86	0.92	0.91	0.93	-0.07	1000000000000
Supercontig_12.6:827066:827309:+@Supercontig_12.6:827480:827699:+@Supercontig_12.6:827796:828444:+	Exon skipping	1	1	1	1	0.99	1	0	0
Supercontig_12.6:1128955:1129467:-@Supercontig_12.6:1128635:1128715:-@Supercontig_12.6:1127793:1128164:-	Exon skipping	0.04	0.03	0.05	0	0	0.01	0.04	1000000000000
Supercontig_12.6:4105558:4106597:-@Supercontig_12.6:4105273:4105391:-@Supercontig_12.6:4102833:4105188:-	Exon skipping	0.87	0.72	0.99	0.93	0.82	0.99	-0.06	0.32
Supercontig_12.6:1732736:1732938:+@Supercontig_12.6:1733010:1733195:+@Supercontig_12.6:1733269:1733564:+	Exon skipping	1	1	1	1	1	1	0	0
Supercontig_12.6:790957:791023:-@Supercontig_12.6:790795:790887:-@Supercontig_12.6:790553:790647:-	Exon skipping	0.95	0.94	0.96	1	1	1	-0.05	1000000000000
Supercontig_12.6:560677:561022:+@Supercontig_12.6:561282:561392:+@Supercontig_12.6:561462:562736:+	Exon skipping	0.98	0.93	1	0.92	0.86	0.97	0.06	0.32
Supercontig_12.6:4100025:4100570:+@Supercontig_12.6:4101163:4101180:+@Supercontig_12.6:4101399:4101479:+	Exon skipping	1	0.99	1	1	1	1	0	0
Supercontig_12.6:3987148:3987217:+@Supercontig_12.6:3987477:3987511:+@Supercontig_12.6:3987883:3988608:+	Exon skipping	0.66	0.62	0.71	0.27	0.25	0.29	0.39	1000000000000
Supercontig_12.6:2227734:2227954:-@Supercontig_12.6:2227422:2227608:-@Supercontig_12.6:2226356:2227288:-	Exon skipping	0.99	0.99	0.99	1	1	1	-0.01	0
Supercontig_12.6:1128955:1129467:-@Supercontig_12.6:1128842:1128855:-@Supercontig_12.6:1128635:1128715:-	Exon skipping	0.82	0.76	0.86	1	0.99	1	-0.18	1000000000000
Supercontig_12.6:1909190:1909299:+@Supercontig_12.6:1909749:1910412:+@Supercontig_12.6:1910510:1911046:+	Exon skipping	1	1	1	1	1	1	0	0
Supercontig_12.6:788120:788626:-@Supercontig_12.6:787546:788055:-@Supercontig_12.6:786697:787483:-	Exon skipping	1	1	1	1	1	1	0	0
Supercontig_12.6:1127793:1128164:-@Supercontig_12.6:1127344:1127703:-@Supercontig_12.6:1125094:1127277:-	Exon skipping	1	1	1	1	1	1	0	0
Supercontig_12.6:1393419:1393605:-@Supercontig_12.6:1393225:1393338:-@Supercontig_12.6:1392958:1393144:-	Exon skipping	0.37	0.33	0.42	0.32	0.29	0.36	0.05	0.3
Supercontig_12.6:2437693:2437942:+@Supercontig_12.6:2438078:2438476:+@Supercontig_12.6:2438618:2440341:+	Exon skipping	1	0.98	1	0.97	0.93	0.99	0.03	0.28
Supercontig_12.6:1660945:1661247:-@Supercontig_12.6:1660308:1660505:-@Supercontig_12.6:1660009:1660220:-	Exon skipping	0.62	0.6	0.63	0.28	0.27	0.29	0.34	1000000000000
Supercontig_12.6:1647926:1648153:-@Supercontig_12.6:1647637:1647668:-@Supercontig_12.6:1647466:1647530:-	Exon skipping	0.98	0.96	1	0.95	0.9	0.98	0.03	0.13
Supercontig_12.6:3987477:3987511:+@Supercontig_12.6:3987608:3987697:+@Supercontig_12.6:3987883:3988608:+	Exon skipping	1	1	1	1	1	1	0	0
Supercontig_12.6:760426:762034:-@Supercontig_12.6:760236:760343:-@Supercontig_12.6:760075:760151:-	Exon skipping	0.72	0.58	0.88	0.79	0.67	0.9	-0.07	0.35
Supercontig_12.6:1252250:1252587:-@Supercontig_12.6:1252089:1252168:-@Supercontig_12.6:1251772:1252019:-	Exon skipping	1	1	1	1	1	1	0	0
Supercontig_12.6:1128635:1128715:-@Supercontig_12.6:1128233:1128531:-@Supercontig_12.6:1127793:1128164:-	Exon skipping	1	1	1	1	1	1	0	0
Supercontig_12.6:1131140:1131864:-@Supercontig_12.6:1130946:1131071:-@Supercontig_12.6:1129974:1130894:-	Exon skipping	0.98	0.92	1	0.99	0.94	1	-0.01	0.05
Supercontig_12.6:757123:757972:+@Supercontig_12.6:758378:758688:+@Supercontig_12.6:758747:758822:+	Exon skipping	1	0.99	1	0.99	0.99	1	0.01	0
Supercontig_12.6:1393419:1393532:-@Supercontig_12.6:1393240:1393338:-@Supercontig_12.6:1392958:1393144:-	Exon skipping	0.43	0.39	0.48	0.33	0.3	0.37	0.1	7.95
Supercontig_12.4:4538156:4538835:-@Supercontig_12.4:4537940:4538077:-@Supercontig_12.4:4536318:4537876:-	Exon skipping	0.96	0.94	0.98	0.95	0.93	0.96	0.01	0.05
Supercontig_12.4:4352332:4352480:+@Supercontig_12.4:4352644:4352696:+@Supercontig_12.4:4352806:4352859:+	Exon skipping	1	1	1	1	1	1	0	0
Supercontig_12.4:5550661:5551172:+@Supercontig_12.4:5551250:5551278:+@Supercontig_12.4:5551362:5551826:+	Exon skipping	1	0.99	1	0.98	0.96	1	0.02	0.04
Supercontig_12.4:694617:694801:+@Supercontig_12.4:694872:694982:+@Supercontig_12.4:695088:695605:+	Exon skipping	1	0.99	1	1	0.99	1	0	0
Supercontig_12.4:3741770:3741997:+@Supercontig_12.4:3742169:3742227:+@Supercontig_12.4:3742348:3742770:+	Exon skipping	1	0.99	1	1	1	1	0	0
Supercontig_12.4:5455175:5455263:+@Supercontig_12.4:5455348:5455390:+@Supercontig_12.4:5455524:5456294:+	Exon skipping	0.97	0.89	1	0.98	0.93	1	-0.01	0.06
Supercontig_12.4:5258482:5259223:-@Supercontig_12.4:5258202:5258335:-@Supercontig_12.4:5257016:5258078:-	Exon skipping	0.98	0.97	0.99	0.99	0.98	0.99	-0.01	0
Supercontig_12.4:3692697:3692986:-@Supercontig_12.4:3692516:3692625:-@Supercontig_12.4:3691996:3692454:-	Exon skipping	1	1	1	1	1	1	0	0
Supercontig_12.4:1621145:1621426:+@Supercontig_12.4:1621561:1621665:+@Supercontig_12.4:1621862:1622380:+	Exon skipping	1	1	1	1	1	1	0	0
Supercontig_12.4:2789617:2789874:+@Supercontig_12.4:2790054:2790086:+@Supercontig_12.4:2790172:2790333:+	Exon skipping	0.93	0.92	0.94	0.92	0.91	0.93	0.01	0.04
Supercontig_12.4:244824:245008:-@Supercontig_12.4:244625:244664:-@Supercontig_12.4:243564:244545:-	Exon skipping	0.96	0.95	0.98	0.94	0.92	0.96	0.02	0.3
Supercontig_12.4:3199322:3199426:-@Supercontig_12.4:3199142:3199240:-@Supercontig_12.4:3198966:3199061:-	Exon skipping	1	0.99	1	1	0.99	1	0	0
Supercontig_12.4:1295667:1295850:-@Supercontig_12.4:1295513:1295539:-@Supercontig_12.4:1294220:1295334:-	Exon skipping	0.91	0.78	0.98	0.83	0.74	0.92	0.08	0.32
Supercontig_12.4:244824:245108:-@Supercontig_12.4:244625:244664:-@Supercontig_12.4:243232:244545:-	Exon skipping	0.97	0.95	0.98	0.94	0.92	0.96	0.03	0.28
Supercontig_12.4:826813:827069:+@Supercontig_12.4:827174:827223:+@Supercontig_12.4:827328:827794:+	Exon skipping	1	1	1	1	1	1	0	0
Supercontig_12.4:2789696:2789874:+@Supercontig_12.4:2790054:2790086:+@Supercontig_12.4:2790172:2790333:+	Exon skipping	0.92	0.91	0.94	0.92	0.9	0.93	0	0.03
Supercontig_12.4:3169773:3169972:+@Supercontig_12.4:3170108:3170153:+@Supercontig_12.4:3170211:3171405:+	Exon skipping	0.99	0.96	1	0.99	0.97	1	0	0.03
Supercontig_12.4:1834763:1835140:+@Supercontig_12.4:1835259:1835299:+@Supercontig_12.4:1835411:1835671:+	Exon skipping	0.99	0.98	1	1	0.99	1	-0.01	0
Supercontig_12.4:5706995:5707145:+@Supercontig_12.4:5707277:5707342:+@Supercontig_12.4:5707417:5707844:+	Exon skipping	1	1	1	1	1	1	0	0
Supercontig_12.4:2278161:2280046:+@Supercontig_12.4:2280097:2280124:+@Supercontig_12.4:2280180:2280796:+	Exon skipping	0.97	0.95	0.99	0.99	0.97	1	-0.02	0.09
Supercontig_12.4:5503399:5503584:-@Supercontig_12.4:5502814:5503083:-@Supercontig_12.4:5502619:5502745:-	Exon skipping	1	1	1	1	1	1	0	0
Supercontig_12.4:5668539:5668627:-@Supercontig_12.4:5668272:5668401:-@Supercontig_12.4:5667210:5668079:-	Exon skipping	1	0.99	1	1	1	1	0	0
Supercontig_12.4:5398362:5398458:+@Supercontig_12.4:5398533:5398994:+@Supercontig_12.4:5399189:5400355:+	Exon skipping	1	1	1	1	1	1	0	0
Supercontig_12.4:5706269:5706512:+@Supercontig_12.4:5706600:5706614:+@Supercontig_12.4:5706995:5707145:+	Exon skipping	1	0.99	1	1	0.99	1	0	0
Supercontig_12.4:704681:705177:+@Supercontig_12.4:705249:705436:+@Supercontig_12.4:705527:705637:+	Exon skipping	1	1	1	1	1	1	0	0
Supercontig_12.4:5118906:5119413:-@Supercontig_12.4:5118676:5118790:-@Supercontig_12.4:5118307:5118582:-	Exon skipping	1	0.99	1	1	1	1	0	0
Supercontig_12.4:2191293:2191379:+@Supercontig_12.4:2191453:2191575:+@Supercontig_12.4:2191636:2193186:+	Exon skipping	1	1	1	1	1	1	0	0
Supercontig_12.4:5341531:5342034:-@Supercontig_12.4:5341218:5341469:-@Supercontig_12.4:5340905:5341156:-	Exon skipping	0.99	0.98	1	0.99	0.99	1	0	0
Supercontig_12.4:4352806:4352859:+@Supercontig_12.4:4353134:4353227:+@Supercontig_12.4:4353290:4353346:+	Exon skipping	1	1	1	1	1	1	0	0
Supercontig_12.4:4784216:4784562:+@Supercontig_12.4:4784730:4784753:+@Supercontig_12.4:4785023:4785261:+	Exon skipping	0.98	0.94	1	0.99	0.98	1	-0.01	0.04
Supercontig_12.4:1295667:1296203:-@Supercontig_12.4:1295498:1295539:-@Supercontig_12.4:1294220:1295334:-	Exon skipping	0.98	0.94	1	0.94	0.9	0.97	0.04	0.26
Supercontig_12.4:2653006:2653163:+@Supercontig_12.4:2653226:2653282:+@Supercontig_12.4:2653373:2653417:+	Exon skipping	0.99	0.97	1	0.94	0.89	0.97	0.05	4.88
Supercontig_12.4:2061118:2061348:+@Supercontig_12.4:2061716:2061728:+@Supercontig_12.4:2061805:2062076:+	Exon skipping	0.91	0.89	0.92	0.9	0.89	0.91	0.01	0.04
Supercontig_12.4:1367081:1368070:+@Supercontig_12.4:1368416:1368506:+@Supercontig_12.4:1368625:1369181:+	Exon skipping	0.98	0.95	0.99	0.97	0.95	0.99	0.01	0.04
Supercontig_12.4:3190859:3190941:-@Supercontig_12.4:3190535:3190748:-@Supercontig_12.4:3190297:3190447:-	Exon skipping	1	1	1	1	1	1	0	0
Supercontig_12.4:3898979:3899125:+@Supercontig_12.4:3899389:3899638:+@Supercontig_12.4:3899707:3900540:+	Exon skipping	1	0.99	1	1	0.99	1	0	0
Supercontig_12.4:3199322:3199426:-@Supercontig_12.4:3198966:3199061:-@Supercontig_12.4:3198776:3198896:-	Exon skipping	0.71	0.58	0.83	0.98	0.93	1	-0.27	794633
Supercontig_12.4:4431604:4431957:+@Supercontig_12.4:4432323:4432482:+@Supercontig_12.4:4432560:4437794:+	Exon skipping	1	0.98	1	1	0.99	1	0	0
Supercontig_12.4:5706269:5706512:+@Supercontig_12.4:5706995:5707145:+@Supercontig_12.4:5707417:5707844:+	Exon skipping	1	1	1	1	1	1	0	0
Supercontig_12.4:1868171:1868243:-@Supercontig_12.4:1868055:1868104:-@Supercontig_12.4:1867266:1867975:-	Exon skipping	1	1	1	1	0.99	1	0	0
Supercontig_12.4:2289378:2289485:+@Supercontig_12.4:2289549:2289708:+@Supercontig_12.4:2289858:2290616:+	Exon skipping	0.54	0.45	0.64	0.61	0.53	0.69	-0.07	0.27
Supercontig_12.4:4761061:4761401:-@Supercontig_12.4:4760765:4760884:-@Supercontig_12.4:4758819:4760669:-	Exon skipping	0.09	0.07	0.12	0.14	0.12	0.17	-0.05	1.78
Supercontig_12.4:3200651:3200794:-@Supercontig_12.4:3200456:3200566:-@Supercontig_12.4:3199564:3200395:-	Exon skipping	0.99	0.98	1	1	0.99	1	-0.01	0
Supercontig_12.3:2643344:2643737:-@Supercontig_12.3:2643175:2643216:-@Supercontig_12.3:2642862:2643049:-	Exon skipping	1	0.99	1	1	1	1	0	0
Supercontig_12.3:4378654:4379240:-@Supercontig_12.3:4378189:4378318:-@Supercontig_12.3:4377728:4377815:-	Exon skipping	0.91	0.82	0.97	0.86	0.78	0.92	0.05	0.23
Supercontig_12.3:1496221:1496412:-@Supercontig_12.3:1495815:1496064:-@Supercontig_12.3:1494836:1495751:-	Exon skipping	1	1	1	1	1	1	0	0
Supercontig_12.3:4147546:4147679:+@Supercontig_12.3:4147898:4147998:+@Supercontig_12.3:4148213:4148983:+	Exon skipping	1	1	1	1	1	1	0	0
Supercontig_12.3:3782530:3782676:+@Supercontig_12.3:3782911:3783021:+@Supercontig_12.3:3783106:3783327:+	Exon skipping	1	1	1	1	1	1	0	0
Supercontig_12.3:2343508:2343603:-@Supercontig_12.3:2343204:2343258:-@Supercontig_12.3:2342227:2342988:-	Exon skipping	1	0.98	1	0.99	0.98	1	0.01	0
Supercontig_12.3:2631134:2631322:+@Supercontig_12.3:2631425:2632129:+@Supercontig_12.3:2632226:2632778:+	Exon skipping	0.92	0.9	0.94	0.91	0.9	0.93	0.01	0.05
Supercontig_12.3:3958136:3958260:-@Supercontig_12.3:3957835:3957956:-@Supercontig_12.3:3957227:3957691:-	Exon skipping	1	1	1	1	1	1	0	0
Supercontig_12.3:4427618:4428591:-@Supercontig_12.3:4427249:4427337:-@Supercontig_12.3:4427042:4427185:-	Exon skipping	0.13	0.05	0.24	0.28	0.17	0.41	-0.15	0.93
Supercontig_12.3:607914:609323:+@Supercontig_12.3:609559:610401:+@Supercontig_12.3:610451:610590:+	Exon skipping	1	1	1	1	1	1	0	0
Supercontig_12.3:3033749:3033927:-@Supercontig_12.3:3033316:3033578:-@Supercontig_12.3:3032634:3033142:-	Exon skipping	0.69	0.62	0.76	0.71	0.64	0.78	-0.02	0.14
Supercontig_12.3:2466590:2466917:-@Supercontig_12.3:2466339:2466459:-@Supercontig_12.3:2463469:2466266:-	Exon skipping	0.99	0.95	1	0.97	0.93	0.99	0.02	0.09
Supercontig_12.3:3634737:3634983:-@Supercontig_12.3:3633262:3633371:-@Supercontig_12.3:3633109:3633210:-	Exon skipping	0.99	0.97	1	0.96	0.92	0.99	0.03	0.29
Supercontig_12.3:4958375:4958583:+@Supercontig_12.3:4958742:4959109:+@Supercontig_12.3:4959183:4959618:+	Exon skipping	1	1	1	1	1	1	0	0
Supercontig_12.3:2664151:2664221:-@Supercontig_12.3:2664054:2664086:-@Supercontig_12.3:2663373:2663878:-	Exon skipping	1	0.99	1	0.98	0.98	0.99	0.02	105213
Supercontig_12.3:1398631:1398762:-@Supercontig_12.3:1398214:1398398:-@Supercontig_12.3:1397265:1397941:-	Exon skipping	1	0.99	1	1	1	1	0	0
Supercontig_12.3:1097420:1097438:-@Supercontig_12.3:1097027:1097309:-@Supercontig_12.3:1096507:1096927:-	Exon skipping	1	0.99	1	1	0.99	1	0	0
Supercontig_12.3:1997665:1997860:-@Supercontig_12.3:1997158:1997538:-@Supercontig_12.3:1994827:1997043:-	Exon skipping	1	0.99	1	1	0.99	1	0	0
Supercontig_12.3:993146:993299:-@Supercontig_12.3:992794:992857:-@Supercontig_12.3:992424:992729:-	Exon skipping	1	1	1	1	1	1	0	0
Supercontig_12.3:1228819:1228909:+@Supercontig_12.3:1229027:1229079:+@Supercontig_12.3:1229178:1229759:+	Exon skipping	0.99	0.98	1	0.98	0.96	0.99	0.01	0.04
Supercontig_12.3:3958433:3958472:-@Supercontig_12.3:3958136:3958260:-@Supercontig_12.3:3957835:3957956:-	Exon skipping	1	1	1	1	1	1	0	0
Supercontig_12.3:1286025:1286535:+@Supercontig_12.3:1286691:1286877:+@Supercontig_12.3:1286949:1289418:+	Exon skipping	0.99	0.95	1	0.98	0.95	1	0.01	0.04
Supercontig_12.3:1000986:1001040:+@Supercontig_12.3:1001256:1001416:+@Supercontig_12.3:1001472:1002117:+	Exon skipping	1	1	1	1	1	1	0	0
Supercontig_12.3:2058810:2059146:+@Supercontig_12.3:2059355:2059428:+@Supercontig_12.3:2059893:2060366:+	Exon skipping	0.99	0.99	1	0.99	0.98	0.99	0	0
Supercontig_12.3:3865517:3866235:+@Supercontig_12.3:3866316:3866525:+@Supercontig_12.3:3866593:3867813:+	Exon skipping	1	0.99	1	0.95	0.9	0.99	0.05	0.44
Supercontig_12.3:4405030:4405453:+@Supercontig_12.3:4405604:4405674:+@Supercontig_12.3:4405770:4406378:+	Exon skipping	1	1	1	1	1	1	0	0
Supercontig_12.3:3782124:3782279:+@Supercontig_12.3:3782333:3782394:+@Supercontig_12.3:3782530:3782676:+	Exon skipping	1	1	1	1	1	1	0	0
Supercontig_12.3:2379374:2379553:+@Supercontig_12.3:2379869:2380225:+@Supercontig_12.3:2380321:2381129:+	Exon skipping	0.99	0.98	0.99	1	1	1	-0.01	8.30648e+09
Supercontig_12.3:3985588:3985762:+@Supercontig_12.3:3986362:3986399:+@Supercontig_12.3:3986509:3986695:+	Exon skipping	1	1	1	1	1	1	0	0
Supercontig_12.3:3762351:3762686:-@Supercontig_12.3:3762146:3762230:-@Supercontig_12.3:3761958:3762007:-	Exon skipping	1	1	1	1	1	1	0	0
Supercontig_12.3:3770136:3770664:+@Supercontig_12.3:3770727:3770824:+@Supercontig_12.3:3770878:3771556:+	Exon skipping	1	1	1	1	1	1	0	0
Supercontig_12.3:3372660:3372908:-@Supercontig_12.3:3372494:3372594:-@Supercontig_12.3:3371487:3372332:-	Exon skipping	0.98	0.94	1	0.99	0.95	1	-0.01	0.04
Supercontig_12.3:2527139:2527401:+@Supercontig_12.3:2527591:2527718:+@Supercontig_12.3:2527999:2528751:+	Exon skipping	0.96	0.94	0.98	0.96	0.93	0.98	0	0.04
Supercontig_12.3:1918218:1918430:+@Supercontig_12.3:1918527:1918621:+@Supercontig_12.3:1918716:1918739:+	Exon skipping	1	1	1	1	1	1	0	0
Supercontig_12.3:1585819:1585858:-@Supercontig_12.3:1585688:1585764:-@Supercontig_12.3:1584834:1585607:-	Exon skipping	1	1	1	1	1	1	0	0
Supercontig_12.3:3798632:3798673:+@Supercontig_12.3:3798739:3798800:+@Supercontig_12.3:3799053:3800054:+	Exon skipping	0.96	0.9	1	0.6	0.55	0.64	0.36	1000000000000
Supercontig_12.3:3415235:3415299:-@Supercontig_12.3:3415115:3415166:-@Supercontig_12.3:3414908:3415010:-	Exon skipping	1	1	1	1	1	1	0	0
Supercontig_12.3:3798572:3798673:+@Supercontig_12.3:3798736:3798800:+@Supercontig_12.3:3799053:3800054:+	Exon skipping	0.99	0.97	1	0.83	0.78	0.88	0.16	1.70111e+11
Supercontig_12.3:3665138:3665359:+@Supercontig_12.3:3665432:3665461:+@Supercontig_12.3:3665582:3665735:+	Exon skipping	1	1	1	1	1	1	0	0
Supercontig_12.3:4150653:4150859:-@Supercontig_12.3:4150415:4150496:-@Supercontig_12.3:4150068:4150333:-	Exon skipping	0.96	0.95	0.97	1	1	1	-0.04	1000000000000
Supercontig_12.3:1228247:1228579:+@Supercontig_12.3:1228730:1228739:+@Supercontig_12.3:1228819:1228909:+	Exon skipping	0.97	0.92	1	0.95	0.89	0.98	0.02	0.14
Supercontig_12.3:1198031:1198678:-@Supercontig_12.3:1197856:1197976:-@Supercontig_12.3:1196594:1197798:-	Exon skipping	1	1	1	1	1	1	0	0
Supercontig_12.1:2696416:2696665:-@Supercontig_12.1:2696150:2696275:-@Supercontig_12.1:2695943:2696020:-	Exon skipping	1	1	1	1	1	1	0	0
Supercontig_12.1:4957649:4957969:+@Supercontig_12.1:4958034:4958122:+@Supercontig_12.1:4958195:4959053:+	Exon skipping	1	1	1	1	1	1	0	0
Supercontig_12.1:6359909:6359980:-@Supercontig_12.1:6359775:6359849:-@Supercontig_12.1:6358376:6359715:-	Exon skipping	1	0.99	1	1	0.99	1	0	0
Supercontig_12.1:1177734:1177940:+@Supercontig_12.1:1178239:1178454:+@Supercontig_12.1:1178765:1179573:+	Exon skipping	0.99	0.97	1	0.93	0.88	0.96	0.06	3.22
Supercontig_12.1:6540857:6541057:+@Supercontig_12.1:6541251:6541327:+@Supercontig_12.1:6542003:6543550:+	Exon skipping	1	1	1	1	1	1	0	0
Supercontig_12.1:1513887:1514791:-@Supercontig_12.1:1513505:1513834:-@Supercontig_12.1:1513215:1513444:-	Exon skipping	0.95	0.87	0.99	0.97	0.93	0.99	-0.02	0.11
Supercontig_12.1:7241228:7241274:+@Supercontig_12.1:7241336:7241428:+@Supercontig_12.1:7241713:7241789:+	Exon skipping	0.99	0.98	1	0.99	0.98	0.99	0	0
Supercontig_12.1:4708054:4708349:-@Supercontig_12.1:4707747:4707978:-@Supercontig_12.1:4706182:4707471:-	Exon skipping	0.36	0.28	0.45	0.18	0.12	0.25	0.18	35.16
Supercontig_12.1:9338769:9338938:+@Supercontig_12.1:9339049:9339157:+@Supercontig_12.1:9339312:9339404:+	Exon skipping	1	1	1	1	1	1	0	0
Supercontig_12.1:1294508:1295011:+@Supercontig_12.1:1295157:1295201:+@Supercontig_12.1:1295548:1296535:+	Exon skipping	0.71	0.62	0.81	0.6	0.53	0.67	0.11	0.85
Supercontig_12.1:5945167:5945759:+@Supercontig_12.1:5946175:5946305:+@Supercontig_12.1:5946379:5946724:+	Exon skipping	1	1	1	1	1	1	0	0
Supercontig_12.1:7105043:7105538:-@Supercontig_12.1:7104312:7104685:-@Supercontig_12.1:7103214:7104125:-	Exon skipping	0.94	0.9	0.97	0.98	0.96	1	-0.04	0.64
Supercontig_12.1:9090653:9090842:+@Supercontig_12.1:9091412:9091640:+@Supercontig_12.1:9091716:9091888:+	Exon skipping	1	1	1	1	1	1	0	0
Supercontig_12.1:4136249:4136435:-@Supercontig_12.1:4135754:4136030:-@Supercontig_12.1:4135019:4135621:-	Exon skipping	0.99	0.99	1	1	1	1	-0.01	0
Supercontig_12.1:8974340:8974651:+@Supercontig_12.1:8974827:8975284:+@Supercontig_12.1:8975511:8976019:+	Exon skipping	1	1	1	1	1	1	0	0
Supercontig_12.1:3525616:3525856:-@Supercontig_12.1:3525329:3525369:-@Supercontig_12.1:3525126:3525223:-	Exon skipping	1	0.99	1	0.99	0.98	1	0.01	0
Supercontig_12.1:1788413:1788723:-@Supercontig_12.1:1787940:1788032:-@Supercontig_12.1:1787273:1787865:-	Exon skipping	0.63	0.59	0.67	0.61	0.58	0.64	0.02	0.09
Supercontig_12.1:3974420:3974681:-@Supercontig_12.1:3974278:3974360:-@Supercontig_12.1:3972683:3974203:-	Exon skipping	0.86	0.79	0.91	0.99	0.97	1	-0.13	523536
Supercontig_12.1:2433426:2433504:-@Supercontig_12.1:2433181:2433282:-@Supercontig_12.1:2432597:2433081:-	Exon skipping	1	1	1	1	0.99	1	0	0
Supercontig_12.1:2408799:2409185:-@Supercontig_12.1:2408569:2408644:-@Supercontig_12.1:2408377:2408493:-	Exon skipping	1	1	1	1	1	1	0	0
Supercontig_12.1:5507665:5507849:-@Supercontig_12.1:5507423:5507599:-@Supercontig_12.1:5507053:5507363:-	Exon skipping	1	1	1	1	1	1	0	0
Supercontig_12.1:3362215:3362466:-@Supercontig_12.1:3361968:3362013:-@Supercontig_12.1:3361502:3361785:-	Exon skipping	1	1	1	0.99	0.98	0.99	0.01	0
Supercontig_12.1:1666305:1666356:-@Supercontig_12.1:1666033:1666217:-@Supercontig_12.1:1665463:1665897:-	Exon skipping	1	1	1	1	1	1	0	0
Supercontig_12.1:8203446:8203621:-@Supercontig_12.1:8202913:8203364:-@Supercontig_12.1:8202561:8202783:-	Exon skipping	1	1	1	1	1	1	0	0
Supercontig_12.1:7406613:7406919:+@Supercontig_12.1:7406996:7407027:+@Supercontig_12.1:7407134:7407213:+	Exon skipping	0.99	0.98	1	0.99	0.98	1	0	0
Supercontig_12.1:3674708:3674910:+@Supercontig_12.1:3675302:3675352:+@Supercontig_12.1:3675642:3675715:+	Exon skipping	0.76	0.74	0.77	0.94	0.93	0.94	-0.18	1000000000000
Supercontig_12.1:4136249:4136435:-@Supercontig_12.1:4135754:4136112:-@Supercontig_12.1:4135019:4135621:-	Exon skipping	0.99	0.99	1	1	1	1	-0.01	0
Supercontig_12.1:9058866:9059057:-@Supercontig_12.1:9058557:9058702:-@Supercontig_12.1:9058328:9058459:-	Exon skipping	1	1	1	1	1	1	0	0
Supercontig_12.1:4402395:4402946:-@Supercontig_12.1:4401654:4401743:-@Supercontig_12.1:4398398:4401517:-	Exon skipping	0.99	0.97	1	0.99	0.97	1	0	0.03
Supercontig_12.1:5918267:5918962:-@Supercontig_12.1:5917603:5918010:-@Supercontig_12.1:5915581:5917495:-	Exon skipping	1	1	1	1	1	1	0	0
Supercontig_12.1:7692417:7692770:-@Supercontig_12.1:7692182:7692247:-@Supercontig_12.1:7691155:7692015:-	Exon skipping	0.96	0.93	0.98	0.96	0.93	0.98	0	0.05
Supercontig_12.1:4660425:4660596:-@Supercontig_12.1:4660055:4660141:-@Supercontig_12.1:4658776:4659980:-	Exon skipping	1	0.99	1	1	0.99	1	0	0
Supercontig_12.1:4867542:4867928:+@Supercontig_12.1:4868116:4868194:+@Supercontig_12.1:4868282:4868709:+	Exon skipping	0.84	0.73	0.92	0.87	0.79	0.94	-0.03	0.17
Supercontig_12.1:9058866:9059057:-@Supercontig_12.1:9058328:9058459:-@Supercontig_12.1:9057702:9058134:-	Exon skipping	1	1	1	1	1	1	0	0
Supercontig_12.1:3674708:3674910:+@Supercontig_12.1:3675642:3675715:+@Supercontig_12.1:3675948:3676165:+	Exon skipping	1	1	1	1	0.99	1	0	0
Supercontig_12.1:5880601:5881318:+@Supercontig_12.1:5881527:5881648:+@Supercontig_12.1:5881754:5882162:+	Exon skipping	0.8	0.73	0.87	0.9	0.83	0.96	-0.1	0.79
Supercontig_12.1:4810909:4811560:-@Supercontig_12.1:4810648:4810751:-@Supercontig_12.1:4809098:4810551:-	Exon skipping	0.14	0.08	0.21	0.09	0.05	0.15	0.05	0.17
Supercontig_12.1:2582565:2582985:-@Supercontig_12.1:2582211:2582365:-@Supercontig_12.1:2580351:2580869:-	Exon skipping	1	1	1	1	1	1	0	0
Supercontig_12.1:3324753:3324873:-@Supercontig_12.1:3324261:3324411:-@Supercontig_12.1:3323046:3324201:-	Exon skipping	1	0.99	1	1	0.99	1	0	0
Supercontig_12.1:3678314:3678390:+@Supercontig_12.1:3678455:3678528:+@Supercontig_12.1:3678586:3678656:+	Exon skipping	0.99	0.97	1	1	0.99	1	-0.01	0.04
Supercontig_12.1:3267908:3268044:+@Supercontig_12.1:3268235:3268374:+@Supercontig_12.1:3268503:3268728:+	Exon skipping	1	1	1	1	1	1	0	0
Supercontig_12.1:9626227:9626426:-@Supercontig_12.1:9626140:9626154:-@Supercontig_12.1:9625326:9626007:-	Exon skipping	0.71	0.67	0.76	1	1	1	-0.29	1000000000000
Supercontig_12.1:4147254:4147562:-@Supercontig_12.1:4146856:4147010:-@Supercontig_12.1:4146645:4146707:-	Exon skipping	1	1	1	1	1	1	0	0
Supercontig_12.1:3325141:3325702:-@Supercontig_12.1:3324753:3324873:-@Supercontig_12.1:3324261:3324411:-	Exon skipping	0.98	0.97	0.99	1	0.99	1	-0.02	0.06
Supercontig_12.1:9005537:9006015:+@Supercontig_12.1:9007017:9007238:+@Supercontig_12.1:9007465:9008102:+	Exon skipping	0.57	0.48	0.67	0.63	0.54	0.72	-0.06	0.25
Supercontig_12.1:6540857:6541057:+@Supercontig_12.1:6541644:6541940:+@Supercontig_12.1:6542003:6543550:+	Exon skipping	1	1	1	1	1	1	0	0
Supercontig_12.1:8376194:8376580:+@Supercontig_12.1:8376914:8376984:+@Supercontig_12.1:8377641:8380277:+	Exon skipping	0.83	0.7	0.94	0.89	0.77	0.99	-0.06	0.27
Supercontig_12.1:6813624:6813683:-@Supercontig_12.1:6813377:6813559:-@Supercontig_12.1:6812522:6813226:-	Exon skipping	1	1	1	1	1	1	0	0
Supercontig_12.1:9005537:9006015:+@Supercontig_12.1:9007005:9007238:+@Supercontig_12.1:9007465:9008102:+	Exon skipping	0.45	0.37	0.54	0.56	0.48	0.64	-0.11	0.57
Supercontig_12.1:9058866:9059057:-@Supercontig_12.1:9058557:9058702:-@Supercontig_12.1:9057702:9058134:-	Exon skipping	1	1	1	1	1	1	0	0
Supercontig_12.1:3099979:3100365:-@Supercontig_12.1:3099747:3099830:-@Supercontig_12.1:3098833:3099675:-	Exon skipping	1	0.99	1	0.99	0.98	1	0.01	0
Supercontig_12.1:5449020:5449418:-@Supercontig_12.1:5448579:5448637:-@Supercontig_12.1:5448185:5448495:-	Exon skipping	1	1	1	1	1	1	0	0
Supercontig_12.1:5880080:5880406:-@Supercontig_12.1:5879931:5880007:-@Supercontig_12.1:5879129:5879803:-	Exon skipping	0.98	0.93	1	0.98	0.93	1	0	0.06
Supercontig_12.1:2767755:2768346:-@Supercontig_12.1:2767604:2767653:-@Supercontig_12.1:2767454:2767529:-	Exon skipping	1	0.99	1	1	1	1	0	0
Supercontig_12.1:4553397:4553596:+@Supercontig_12.1:4553914:4553946:+@Supercontig_12.1:4554018:4554573:+	Exon skipping	1	1	1	1	0.99	1	0	0
Supercontig_12.1:3307474:3307569:-@Supercontig_12.1:3305614:3307379:-@Supercontig_12.1:3303926:3304649:-	Exon skipping	1	1	1	0.99	0.98	1	0.01	0
Supercontig_12.1:7405030:7405097:-@Supercontig_12.1:7404590:7404759:-@Supercontig_12.1:7403946:7404523:-	Exon skipping	1	1	1	1	1	1	0	0
Supercontig_12.1:5358264:5358608:+@Supercontig_12.1:5358666:5359605:+@Supercontig_12.1:5359661:5360293:+	Exon skipping	1	1	1	1	0.99	1	0	0
Supercontig_12.1:4733716:4733957:+@Supercontig_12.1:4734024:4734189:+@Supercontig_12.1:4734276:4734648:+	Exon skipping	1	0.98	1	1	0.99	1	0	0
Supercontig_12.1:1438721:1438865:-@Supercontig_12.1:1438587:1438645:-@Supercontig_12.1:1437773:1438527:-	Exon skipping	0.99	0.97	1	1	0.99	1	-0.01	0
Supercontig_12.1:821652:821800:+@Supercontig_12.1:821897:821910:+@Supercontig_12.1:822129:822259:+	Exon skipping	1	1	1	1	1	1	0	0
Supercontig_12.1:3588801:3588941:-@Supercontig_12.1:3588564:3588677:-@Supercontig_12.1:3588061:3588459:-	Exon skipping	0.92	0.9	0.94	0.94	0.93	0.96	-0.02	0.11
Supercontig_12.1:6541251:6541327:+@Supercontig_12.1:6541644:6541940:+@Supercontig_12.1:6542003:6543550:+	Exon skipping	1	1	1	1	1	1	0	0
Supercontig_12.1:4957800:4957969:+@Supercontig_12.1:4958034:4958122:+@Supercontig_12.1:4958195:4959389:+	Exon skipping	1	1	1	1	1	1	0	0
Supercontig_12.1:5861523:5862013:+@Supercontig_12.1:5862125:5862178:+@Supercontig_12.1:5862353:5862597:+	Exon skipping	0.72	0.67	0.77	0.73	0.69	0.77	-0.01	0.09
Supercontig_12.1:2234832:2235079:-@Supercontig_12.1:2234693:2234709:-@Supercontig_12.1:2234389:2234594:-	Exon skipping	0.97	0.89	1	0.71	0.67	0.74	0.26	10800453636
Supercontig_12.1:172853:173197:-@Supercontig_12.1:172560:172668:-@Supercontig_12.1:172415:172480:-	Exon skipping	0.99	0.97	1	0.99	0.98	1	0	0
Supercontig_12.1:6540857:6541057:+@Supercontig_12.1:6541251:6541327:+@Supercontig_12.1:6541644:6541940:+	Exon skipping	0.99	0.99	1	1	1	1	-0.01	0
Supercontig_12.1:4874283:4874484:-@Supercontig_12.1:4874161:4874218:-@Supercontig_12.1:4872408:4874105:-	Exon skipping	0.96	0.88	1	0.54	0.39	0.7	0.42	9.79923e+11
Supercontig_12.1:4992229:4992294:+@Supercontig_12.1:4992366:4992414:+@Supercontig_12.1:4992473:4993348:+	Exon skipping	1	1	1	1	1	1	0	0
Supercontig_12.1:4149614:4149674:-@Supercontig_12.1:4148623:4149525:-@Supercontig_12.1:4148071:4148538:-	Exon skipping	1	1	1	1	1	1	0	0
Supercontig_12.1:1135809:1135988:-@Supercontig_12.1:1135557:1135708:-@Supercontig_12.1:1135057:1135498:-	Exon skipping	1	1	1	1	1	1	0	0
Supercontig_12.1:6126014:6126724:-@Supercontig_12.1:6125708:6125732:-@Supercontig_12.1:6125303:6125381:-	Exon skipping	0.98	0.93	1	0.88	0.79	0.94	0.1	1.6
Supercontig_12.1:3990835:3991131:+@Supercontig_12.1:3991201:3991493:+@Supercontig_12.1:3991592:3992328:+	Exon skipping	0.98	0.96	0.99	1	0.99	1	-0.02	0.2
Supercontig_12.1:4730146:4730355:+@Supercontig_12.1:4730619:4730762:+@Supercontig_12.1:4730994:4732057:+	Exon skipping	1	1	1	1	1	1	0	0
Supercontig_12.1:1711832:1711961:+@Supercontig_12.1:1712203:1712341:+@Supercontig_12.1:1712401:1714654:+	Exon skipping	1	1	1	1	1	1	0	0
Supercontig_12.1:5681906:5681996:-@Supercontig_12.1:5681772:5681846:-@Supercontig_12.1:5680387:5681639:-	Exon skipping	1	1	1	1	1	1	0	0
Supercontig_12.1:821897:821910:+@Supercontig_12.1:822129:822259:+@Supercontig_12.1:822377:823144:+	Exon skipping	1	1	1	1	1	1	0	0
Supercontig_12.1:1165504:1165641:+@Supercontig_12.1:1165870:1165915:+@Supercontig_12.1:1165976:1166369:+	Exon skipping	0.9	0.88	0.91	1	1	1	-0.1	1000000000000
Supercontig_12.1:5696142:5696458:-@Supercontig_12.1:5695465:5695672:-@Supercontig_12.1:5695129:5695373:-	Exon skipping	1	1	1	1	1	1	0	0
Supercontig_12.1:1128813:1129113:-@Supercontig_12.1:1128577:1128595:-@Supercontig_12.1:1128190:1128485:-	Exon skipping	1	1	1	0.19	0.17	0.22	0.81	1000000000000
Supercontig_12.1:9410800:9410890:+@Supercontig_12.1:9411308:9411500:+@Supercontig_12.1:9411651:9413139:+	Exon skipping	1	0.99	1	1	0.99	1	0	0
Supercontig_12.1:7747699:7747981:-@Supercontig_12.1:7747440:7747566:-@Supercontig_12.1:7746115:7747352:-	Exon skipping	1	1	1	1	1	1	0	0
Supercontig_12.1:1788413:1788723:-@Supercontig_12.1:1788107:1788184:-@Supercontig_12.1:1787940:1788032:-	Exon skipping	1	1	1	1	1	1	0	0
Supercontig_12.1:1128190:1128485:-@Supercontig_12.1:1127728:1128111:-@Supercontig_12.1:1126296:1127658:-	Exon skipping	1	1	1	0.99	0.99	0.99	0.01	0
Supercontig_12.1:4562429:4562551:-@Supercontig_12.1:4561914:4562152:-@Supercontig_12.1:4560893:4561761:-	Exon skipping	1	1	1	1	1	1	0	0
Supercontig_12.1:4919579:4919813:-@Supercontig_12.1:4919483:4919522:-@Supercontig_12.1:4917485:4919402:-	Exon skipping	0.97	0.91	1	0.94	0.88	0.99	0.03	0.12
Supercontig_12.1:9339312:9339404:+@Supercontig_12.1:9339499:9339652:+@Supercontig_12.1:9339719:9339924:+	Exon skipping	1	1	1	1	1	1	0	0
Supercontig_12.1:4708054:4708349:-@Supercontig_12.1:4707747:4707855:-@Supercontig_12.1:4706182:4707471:-	Exon skipping	0.47	0.37	0.56	0.37	0.27	0.47	0.1	0.42
Supercontig_12.1:6142480:6142657:+@Supercontig_12.1:6143029:6143279:+@Supercontig_12.1:6143369:6143891:+	Exon skipping	0.99	0.98	1	1	0.99	1	-0.01	0
Supercontig_12.1:6494540:6497204:-@Supercontig_12.1:6494075:6494245:-@Supercontig_12.1:6493466:6493982:-	Exon skipping	0.97	0.93	0.99	0.99	0.98	1	-0.02	0.17
Supercontig_12.1:1666656:1666966:-@Supercontig_12.1:1666305:1666356:-@Supercontig_12.1:1666033:1666217:-	Exon skipping	1	1	1	1	1	1	0	0
Supercontig_12.1:7241336:7241428:+@Supercontig_12.1:7241713:7241789:+@Supercontig_12.1:7242639:7242779:+	Exon skipping	0.99	0.98	1	0.99	0.98	1	0	0
Supercontig_12.1:3399392:3399590:+@Supercontig_12.1:3399886:3400189:+@Supercontig_12.1:3400289:3400466:+	Exon skipping	1	1	1	1	1	1	0	0
Supercontig_12.1:3205390:3205677:-@Supercontig_12.1:3205238:3205316:-@Supercontig_12.1:3203981:3205153:-	Exon skipping	0.99	0.96	1	0.99	0.98	1	0	0.03
Supercontig_12.1:9058557:9058702:-@Supercontig_12.1:9058328:9058459:-@Supercontig_12.1:9057702:9058134:-	Exon skipping	1	1	1	1	1	1	0	0
Supercontig_12.1:3370379:3370553:+@Supercontig_12.1:3370829:3370888:+@Supercontig_12.1:3370958:3371030:+	Exon skipping	1	1	1	1	0.99	1	0	0
Supercontig_12.1:3268235:3268374:+@Supercontig_12.1:3268503:3268728:+@Supercontig_12.1:3268852:3269533:+	Exon skipping	1	1	1	1	1	1	0	0
Supercontig_12.1:821652:821800:+@Supercontig_12.1:822129:822259:+@Supercontig_12.1:822377:823194:+	Exon skipping	1	1	1	1	1	1	0	0
Supercontig_12.1:4402720:4402946:-@Supercontig_12.1:4402395:4402647:-@Supercontig_12.1:4401654:4401743:-	Exon skipping	1	0.99	1	1	0.98	1	0	0
Supercontig_12.1:7819184:7819365:-@Supercontig_12.1:7818871:7818933:-@Supercontig_12.1:7817742:7818792:-	Exon skipping	1	1	1	1	1	1	0	0
Supercontig_12.5:2562780:2563102:-@Supercontig_12.5:2562502:2562554:-@Supercontig_12.5:2562283:2562356:-	Exon skipping	1	0.98	1	0.97	0.95	0.99	0.03	0.12
Supercontig_12.5:4539652:4539752:+@Supercontig_12.5:4539937:4540080:+@Supercontig_12.5:4540216:4542381:+	Exon skipping	0.24	0.09	0.46	0.16	0.05	0.29	0.08	0.35
Supercontig_12.5:4713085:4713246:-@Supercontig_12.5:4712451:4712781:-@Supercontig_12.5:4712019:4712377:-	Exon skipping	0.99	0.99	1	1	0.99	1	-0.01	0
Supercontig_12.5:2392075:2392133:-@Supercontig_12.5:2391841:2391951:-@Supercontig_12.5:2391046:2391699:-	Exon skipping	1	0.98	1	1	0.99	1	0	0
Supercontig_12.5:4896094:4896326:+@Supercontig_12.5:4896499:4896586:+@Supercontig_12.5:4896704:4896764:+	Exon skipping	1	1	1	1	1	1	0	0
Supercontig_12.5:6348547:6348844:-@Supercontig_12.5:6348082:6348305:-@Supercontig_12.5:6347073:6348026:-	Exon skipping	0.99	0.95	1	0.99	0.95	1	0	0.03
Supercontig_12.5:3241012:3242850:-@Supercontig_12.5:3240790:3240899:-@Supercontig_12.5:3239582:3240721:-	Exon skipping	0.94	0.88	0.97	0.98	0.97	0.99	-0.04	0.34
Supercontig_12.5:3285346:3285474:+@Supercontig_12.5:3285729:3285864:+@Supercontig_12.5:3286050:3286103:+	Exon skipping	1	1	1	1	1	1	0	0
Supercontig_12.5:1342626:1342956:+@Supercontig_12.5:1343092:1343167:+@Supercontig_12.5:1343233:1343511:+	Exon skipping	0.99	0.98	1	0.98	0.95	1	0.01	0.03
Supercontig_12.5:4722989:4723099:-@Supercontig_12.5:4722822:4722892:-@Supercontig_12.5:4722654:4722755:-	Exon skipping	1	1	1	1	1	1	0	0
Supercontig_12.5:1910430:1910463:-@Supercontig_12.5:1910218:1910346:-@Supercontig_12.5:1909771:1910114:-	Exon skipping	1	1	1	1	1	1	0	0
Supercontig_12.5:3095853:3095957:-@Supercontig_12.5:3095558:3095637:-@Supercontig_12.5:3094679:3095268:-	Exon skipping	0.99	0.98	1	0.9	0.86	0.94	0.09	24132.6
Supercontig_12.5:3642719:3642752:-@Supercontig_12.5:3642493:3642613:-@Supercontig_12.5:3642068:3642392:-	Exon skipping	1	1	1	1	1	1	0	0
Supercontig_12.5:1512218:1512594:+@Supercontig_12.5:1512684:1512760:+@Supercontig_12.5:1512834:1515901:+	Exon skipping	0.99	0.96	1	0.97	0.94	1	0.02	0.06
Supercontig_12.5:4008998:4009736:-@Supercontig_12.5:4008660:4008742:-@Supercontig_12.5:4007434:4008598:-	Exon skipping	1	1	1	1	1	1	0	0
Supercontig_12.5:4733406:4733639:-@Supercontig_12.5:4733132:4733277:-@Supercontig_12.5:4732563:4732964:-	Exon skipping	0.64	0.52	0.77	0.94	0.85	0.99	-0.3	18029
Supercontig_12.5:3689433:3689857:-@Supercontig_12.5:3689082:3689220:-@Supercontig_12.5:3686925:3688629:-	Exon skipping	1	0.98	1	1	0.99	1	0	0
Supercontig_12.5:3285729:3285864:+@Supercontig_12.5:3286050:3286103:+@Supercontig_12.5:3286177:3286435:+	Exon skipping	1	1	1	1	1	1	0	0
Supercontig_12.5:3497138:3497280:-@Supercontig_12.5:3496756:3496904:-@Supercontig_12.5:3493284:3496290:-	Exon skipping	0.74	0.63	0.84	0.65	0.56	0.75	0.09	0.37
Supercontig_12.5:5382089:5382777:-@Supercontig_12.5:5381783:5381994:-@Supercontig_12.5:5381499:5381716:-	Exon skipping	0.96	0.88	1	0.97	0.91	1	-0.01	0.09
Supercontig_12.5:1246435:1246647:-@Supercontig_12.5:1246238:1246314:-@Supercontig_12.5:1245625:1246166:-	Exon skipping	1	0.99	1	0.99	0.98	1	0.01	0
Supercontig_12.5:5758785:5759137:-@Supercontig_12.5:5758079:5758139:-@Supercontig_12.5:5757143:5758001:-	Exon skipping	1	1	1	0.93	0.93	0.93	0.07	1000000000000
Supercontig_12.5:4758343:4758629:-@Supercontig_12.5:4758037:4758243:-@Supercontig_12.5:4757550:4757959:-	Exon skipping	1	0.99	1	1	1	1	0	0
Supercontig_12.5:4713085:4713443:-@Supercontig_12.5:4712451:4712640:-@Supercontig_12.5:4712019:4712377:-	Exon skipping	0.99	0.99	1	1	0.99	1	-0.01	0
Supercontig_12.5:3711300:3711454:-@Supercontig_12.5:3711136:3711243:-@Supercontig_12.5:3709855:3711064:-	Exon skipping	0.99	0.98	1	1	0.99	1	-0.01	0
Supercontig_12.5:3684275:3684553:+@Supercontig_12.5:3684776:3684788:+@Supercontig_12.5:3684922:3685051:+	Exon skipping	1	0.99	1	1	0.99	1	0	0
Supercontig_12.5:2142691:2142904:+@Supercontig_12.5:2143107:2143294:+@Supercontig_12.5:2143387:2144554:+	Exon skipping	1	1	1	1	1	1	0	0
Supercontig_12.5:3285268:3285358:+@Supercontig_12.5:3285439:3285474:+@Supercontig_12.5:3285729:3285864:+	Exon skipping	1	1	1	1	1	1	0	0
Supercontig_12.5:4154917:4155190:+@Supercontig_12.5:4155319:4155328:+@Supercontig_12.5:4155504:4156015:+	Exon skipping	0.94	0.92	0.96	0.93	0.9	0.95	0.01	0.06
Supercontig_12.5:4409604:4409961:-@Supercontig_12.5:4408780:4409108:-@Supercontig_12.5:4408468:4408705:-	Exon skipping	1	1	1	1	1	1	0	0
Supercontig_12.5:1352376:1353546:-@Supercontig_12.5:1352288:1352314:-@Supercontig_12.5:1351507:1352232:-	Exon skipping	1	0.99	1	1	0.99	1	0	0
Supercontig_12.5:4332157:4332334:+@Supercontig_12.5:4332531:4332629:+@Supercontig_12.5:4332713:4332928:+	Exon skipping	1	1	1	1	1	1	0	0
Supercontig_12.5:5453672:5453735:+@Supercontig_12.5:5453894:5453959:+@Supercontig_12.5:5454265:5454393:+	Exon skipping	0.98	0.94	1	0.97	0.92	1	0.01	0.05
Supercontig_12.5:5133223:5133901:+@Supercontig_12.5:5134187:5134325:+@Supercontig_12.5:5134395:5134798:+	Exon skipping	1	1	1	1	0.99	1	0	0
Supercontig_12.5:2256127:2256313:-@Supercontig_12.5:2255743:2255842:-@Supercontig_12.5:2254968:2255522:-	Exon skipping	1	1	1	1	1	1	0	0
Supercontig_12.5:5588040:5588156:-@Supercontig_12.5:5587807:5587972:-@Supercontig_12.5:5587099:5587744:-	Exon skipping	1	1	1	1	1	1	0	0
Supercontig_12.5:6360603:6360817:+@Supercontig_12.5:6360919:6361077:+@Supercontig_12.5:6361142:6362021:+	Exon skipping	0.81	0.78	0.84	0.87	0.83	0.9	-0.06	0.9
Supercontig_12.5:4278032:4278251:+@Supercontig_12.5:4278393:4278493:+@Supercontig_12.5:4278973:4279099:+	Exon skipping	0.98	0.97	0.98	0.94	0.93	0.95	0.04	1000000000000
Supercontig_12.5:5715171:5715764:+@Supercontig_12.5:5716369:5716432:+@Supercontig_12.5:5716494:5716823:+	Exon skipping	1	1	1	1	1	1	0	0
Supercontig_12.5:4348748:4348829:-@Supercontig_12.5:4348361:4348438:-@Supercontig_12.5:4347307:4348246:-	Exon skipping	0.37	0.2	0.55	0.45	0.26	0.67	-0.08	0.43
Supercontig_12.5:4781437:4781996:+@Supercontig_12.5:4782055:4782116:+@Supercontig_12.5:4782236:4783164:+	Exon skipping	0.03	0.02	0.04	0.06	0.04	0.07	-0.03	0.57
Supercontig_12.5:6246019:6246170:+@Supercontig_12.5:6246257:6246381:+@Supercontig_12.5:6246472:6247191:+	Exon skipping	1	1	1	1	1	1	0	0
Supercontig_12.5:5297208:5297571:-@Supercontig_12.5:5296533:5296754:-@Supercontig_12.5:5294906:5296466:-	Exon skipping	1	0.99	1	1	0.99	1	0	0
Supercontig_12.5:5648417:5648594:-@Supercontig_12.5:5648187:5648224:-@Supercontig_12.5:5647010:5648105:-	Exon skipping	1	1	1	1	1	1	0	0
Supercontig_12.5:4305804:4305989:+@Supercontig_12.5:4306206:4306251:+@Supercontig_12.5:4306414:4306531:+	Exon skipping	0.79	0.77	0.8	1	1	1	-0.21	1000000000000
Supercontig_12.5:4896094:4896326:+@Supercontig_12.5:4896704:4896764:+@Supercontig_12.5:4896829:4897404:+	Exon skipping	1	1	1	1	1	1	0	0
Supercontig_12.5:2319376:2319588:-@Supercontig_12.5:2319005:2319155:-@Supercontig_12.5:2317805:2318931:-	Exon skipping	1	1	1	1	1	1	0	0
Supercontig_12.5:3019081:3019641:-@Supercontig_12.5:3018714:3018808:-@Supercontig_12.5:3017966:3018609:-	Exon skipping	0.98	0.95	1	0.79	0.73	0.84	0.19	1000000000000
Supercontig_12.5:4713085:4713166:-@Supercontig_12.5:4712451:4712781:-@Supercontig_12.5:4712019:4712377:-	Exon skipping	0.99	0.99	0.99	1	0.99	1	-0.01	0
Supercontig_12.5:4348748:4348829:-@Supercontig_12.5:4348361:4348472:-@Supercontig_12.5:4347307:4348246:-	Exon skipping	0.45	0.28	0.68	0.4	0.25	0.6	0.05	0.38
Supercontig_12.5:2562502:2562554:-@Supercontig_12.5:2562283:2562356:-@Supercontig_12.5:2561792:2562126:-	Exon skipping	1	0.98	1	1	0.98	1	0	0
Supercontig_12.5:2319722:2319837:-@Supercontig_12.5:2319376:2319588:-@Supercontig_12.5:2319005:2319155:-	Exon skipping	1	1	1	1	1	1	0	0
Supercontig_12.5:5115639:5115848:+@Supercontig_12.5:5115904:5116077:+@Supercontig_12.5:5116142:5117351:+	Exon skipping	0.98	0.95	1	0.98	0.93	1	0	0.05
Supercontig_12.1:1023068:1023147:-@Supercontig_12.1:1022976:1022998:-	Intron retention	0.07	0.01	0.22	0.51	0.27	0.78	-0.44	22.52
Supercontig_12.1:1023263:1023289:-@Supercontig_12.1:1023068:1023147:-	Intron retention	0.06	0.01	0.13	0.14	0.06	0.24	-0.08	0.35
Supercontig_12.1:1023672:1024977:-@Supercontig_12.1:1023462:1023493:-	Intron retention	0.16	0.09	0.25	0.35	0.27	0.44	-0.19	19.18
Supercontig_12.1:1042247:1042973:+@Supercontig_12.1:1043079:1043597:+	Intron retention	0.07	0.04	0.11	0.04	0.02	0.07	0.03	0.16
Supercontig_12.1:1043079:1043597:+@Supercontig_12.1:1043715:1043820:+	Intron retention	0.36	0.3	0.43	0.38	0.33	0.43	-0.02	0.12
Supercontig_12.1:1043715:1043820:+@Supercontig_12.1:1043910:1045920:+	Intron retention	0.27	0.22	0.32	0.31	0.26	0.36	-0.04	0.17
Supercontig_12.1:1044371:1046396:-@Supercontig_12.1:1043585:1044245:-	Intron retention	0.77	0.72	0.82	0.9	0.87	0.93	-0.13	202.11
Supercontig_12.1:1048863:1048921:+@Supercontig_12.1:1049003:1049183:+	Intron retention	0.02	0.01	0.03	0.02	0.01	0.03	0	0
Supercontig_12.1:1049258:1049490:+@Supercontig_12.1:1049570:1050458:+	Intron retention	0.05	0.04	0.06	0.06	0.05	0.07	-0.01	0.05
Supercontig_12.1:1056493:1056629:-@Supercontig_12.1:1056041:1056236:-	Intron retention	0.97	0.91	0.99	0.82	0.72	0.91	0.15	5.54
Supercontig_12.1:1056828:1057222:+@Supercontig_12.1:1057302:1058196:+	Intron retention	0.06	0.05	0.08	0.11	0.09	0.14	-0.05	3.71
Supercontig_12.1:1062275:1062441:+@Supercontig_12.1:1062496:1062644:+	Intron retention	0.02	0	0.06	0.15	0.07	0.26	-0.13	13.11
Supercontig_12.1:1064884:1066258:-@Supercontig_12.1:1064556:1064821:-	Intron retention	0.02	0.01	0.04	0.02	0	0.04	0	0.03
Supercontig_12.1:1066667:1067144:-@Supercontig_12.1:1066329:1066500:-	Intron retention	0.07	0.04	0.1	0.02	0.01	0.05	0.05	0.67
Supercontig_12.1:1069705:1070271:-@Supercontig_12.1:1069045:1069649:-	Intron retention	0.02	0	0.05	0.01	0	0.02	0.01	0.05
Supercontig_12.1:1069705:1071303:-@Supercontig_12.1:1069045:1069649:-	Intron retention	0.02	0	0.04	0.01	0	0.02	0.01	0.04
Supercontig_12.1:1070514:1071265:-@Supercontig_12.1:1069705:1070271:-	Intron retention	0.23	0.18	0.29	0.3	0.25	0.36	-0.07	0.48
Supercontig_12.1:1078581:1078727:-@Supercontig_12.1:1077394:1078498:-	Intron retention	0.01	0.01	0.03	0.02	0.01	0.03	-0.01	0
Supercontig_12.1:1083117:1083421:-@Supercontig_12.1:1082726:1083047:-	Intron retention	0.12	0.05	0.24	0.09	0.03	0.18	0.03	0.19
Supercontig_12.1:110973:111273:+@Supercontig_12.1:111335:112060:+	Intron retention	0.33	0.13	0.58	0.84	0.6	0.97	-0.51	43.78
Supercontig_12.1:1121810:1123500:-@Supercontig_12.1:1120540:1121707:-	Intron retention	0.04	0.02	0.07	0.03	0.01	0.06	0.01	0.06
Supercontig_12.1:1127728:1128111:-@Supercontig_12.1:1126296:1127658:-	Intron retention	0	0	0	0	0	0	0	0
Supercontig_12.1:1128577:1128595:-@Supercontig_12.1:1128190:1128485:-	Intron retention	0.01	0.01	0.02	0.02	0.02	0.03	-0.01	0.29
Supercontig_12.1:1133277:1133565:-@Supercontig_12.1:1130487:1133198:-	Intron retention	0.01	0.01	0.02	0	0	0.01	0.01	0.33
Supercontig_12.1:1133797:1134042:-@Supercontig_12.1:1133277:1133565:-	Intron retention	0.04	0.03	0.05	0.06	0.05	0.08	-0.02	0.48
Supercontig_12.1:1135557:1135708:-@Supercontig_12.1:1135057:1135498:-	Intron retention	0	0	0.01	0	0	0.01	0	0
Supercontig_12.1:1135809:1135988:-@Supercontig_12.1:1135557:1135708:-	Intron retention	0	0	0	0	0	0	0	0
Supercontig_12.1:113613:113942:+@Supercontig_12.1:114049:117165:+	Intron retention	0.19	0.12	0.27	0.16	0.11	0.22	0.03	0.15
Supercontig_12.1:1136276:1136630:-@Supercontig_12.1:1135809:1135988:-	Intron retention	0	0	0	0	0	0	0	0
Supercontig_12.1:1138528:1138973:-@Supercontig_12.1:1138024:1138465:-	Intron retention	0.11	0.06	0.17	0.13	0.06	0.22	-0.02	0.13
Supercontig_12.1:1149667:1150161:-@Supercontig_12.1:1148777:1149069:-	Intron retention	0.28	0.2	0.36	0.27	0.21	0.34	0.01	0.13
Supercontig_12.1:1165504:1165641:+@Supercontig_12.1:1165870:1165915:+	Intron retention	0.31	0.28	0.33	0.35	0.32	0.37	-0.04	0.56
Supercontig_12.1:1165619:1165915:+@Supercontig_12.1:1165976:1166369:+	Intron retention	0.13	0.11	0.14	0.11	0.09	0.12	0.02	0.34
Supercontig_12.1:1165870:1165915:+@Supercontig_12.1:1165976:1166369:+	Intron retention	0.14	0.12	0.15	0.11	0.1	0.13	0.03	0.23
Supercontig_12.1:1169721:1170641:+@Supercontig_12.1:1170699:1172483:+	Intron retention	0.02	0.01	0.04	0.01	0	0.02	0.01	0.04
Supercontig_12.1:1173695:1173939:-@Supercontig_12.1:1172476:1173643:-	Intron retention	0.33	0.23	0.46	0.18	0.11	0.27	0.15	1.51
Supercontig_12.1:1174476:1176506:-@Supercontig_12.1:1173993:1174292:-	Intron retention	0.1	0.05	0.16	0.23	0.16	0.31	-0.13	2.69
Supercontig_12.1:1178765:1179573:+@Supercontig_12.1:1179669:1181278:+	Intron retention	0.03	0.01	0.05	0.06	0.03	0.09	-0.03	0.13
Supercontig_12.1:1200240:1200625:+@Supercontig_12.1:1200692:1201414:+	Intron retention	0.1	0.07	0.13	0.03	0.02	0.05	0.07	71986.3
Supercontig_12.1:1233096:1233245:+@Supercontig_12.1:1233674:1234259:+	Intron retention	0.02	0.02	0.03	0.03	0.03	0.04	-0.01	0.12
Supercontig_12.1:1255122:1255376:+@Supercontig_12.1:1255434:1256662:+	Intron retention	0.02	0.01	0.04	0.01	0	0.02	0.01	0.04
Supercontig_12.1:1268157:1268666:+@Supercontig_12.1:1268740:1269998:+	Intron retention	0.05	0.01	0.12	0.02	0	0.06	0.03	0.08
Supercontig_12.1:1271901:1276801:+@Supercontig_12.1:1276863:1277586:+	Intron retention	0.02	0.01	0.03	0.02	0.01	0.03	0	0
Supercontig_12.1:128668:128949:+@Supercontig_12.1:129025:129912:+	Intron retention	0.04	0.01	0.08	0.04	0.02	0.08	0	0.05
Supercontig_12.1:1292291:1292457:-@Supercontig_12.1:1291140:1292223:-	Intron retention	0.21	0.15	0.28	0.17	0.12	0.24	0.04	0.17
Supercontig_12.1:1294508:1295011:+@Supercontig_12.1:1295157:1295201:+	Intron retention	0.01	0.01	0.02	0.02	0.01	0.04	-0.01	0.05
Supercontig_12.1:1295157:1295201:+@Supercontig_12.1:1295548:1296535:+	Intron retention	0.22	0.2	0.24	0.28	0.26	0.31	-0.06	16.15
Supercontig_12.1:1313759:1315463:+@Supercontig_12.1:1315547:1315839:+	Intron retention	0.09	0.05	0.13	0.09	0.05	0.13	0	0.07
Supercontig_12.1:1313759:1315463:+@Supercontig_12.1:1315592:1316433:+	Intron retention	0.22	0.17	0.27	0.15	0.11	0.21	0.07	0.36
Supercontig_12.1:131787:132364:-@Supercontig_12.1:130428:131718:-	Intron retention	0.77	0.3	0.99	0.83	0.54	0.98	-0.06	0.55
Supercontig_12.1:1360522:1361252:-@Supercontig_12.1:1359619:1360243:-	Intron retention	0.06	0.05	0.07	0.08	0.07	0.09	-0.02	1.14
Supercontig_12.1:1366579:1367477:-@Supercontig_12.1:1365670:1366512:-	Intron retention	0.04	0.02	0.09	0.1	0.03	0.18	-0.06	0.24
Supercontig_12.1:137593:138135:+@Supercontig_12.1:138191:139980:+	Intron retention	0.51	0.19	0.84	0.49	0.24	0.74	0.02	0.6
Supercontig_12.1:1399522:1407430:-@Supercontig_12.1:1398925:1399332:-	Intron retention	0.2	0.11	0.32	0.25	0.16	0.36	-0.05	0.24
Supercontig_12.1:1411443:1411616:+@Supercontig_12.1:1411672:1412920:+	Intron retention	0.02	0	0.06	0.01	0	0.02	0.01	0.05
Supercontig_12.1:142951:143960:-@Supercontig_12.1:141779:142860:-	Intron retention	0.07	0.02	0.14	0.07	0.03	0.12	0	0.1
Supercontig_12.1:1438587:1438645:-@Supercontig_12.1:1437773:1438527:-	Intron retention	0.04	0.02	0.07	0.05	0.03	0.08	-0.01	0.05
Supercontig_12.1:1438721:1438865:-@Supercontig_12.1:1438587:1438645:-	Intron retention	0.04	0.01	0.08	0.01	0	0.03	0.03	0.18
Supercontig_12.1:1451214:1451391:+@Supercontig_12.1:1451450:1451618:+	Intron retention	0.01	0	0.01	0	0	0	0.01	0
Supercontig_12.1:1484223:1484459:-@Supercontig_12.1:1482503:1484150:-	Intron retention	0.09	0.06	0.14	0.02	0.01	0.05	0.07	10.48
Supercontig_12.1:1484548:1484761:-@Supercontig_12.1:1484223:1484459:-	Intron retention	0.07	0.03	0.12	0.1	0.05	0.15	-0.03	0.13
Supercontig_12.1:1492949:1493041:-@Supercontig_12.1:1491850:1492873:-	Intron retention	0	0	0.01	0.01	0	0.01	-0.01	0
Supercontig_12.1:1493181:1493467:-@Supercontig_12.1:1492949:1493041:-	Intron retention	0.03	0.02	0.04	0.02	0.01	0.03	0.01	0
Supercontig_12.1:1514873:1516877:-@Supercontig_12.1:1513887:1514791:-	Intron retention	0.5	0.38	0.61	0.95	0.85	1	-0.45	1000000000000
Supercontig_12.1:1523187:1523272:+@Supercontig_12.1:1523341:1524619:+	Intron retention	0.05	0.02	0.08	0.13	0.09	0.18	-0.08	3.38
Supercontig_12.1:154387:154466:-@Supercontig_12.1:153745:154328:-	Intron retention	0.05	0.03	0.08	0.03	0.01	0.06	0.02	0.06
Supercontig_12.1:154536:155040:-@Supercontig_12.1:154387:154466:-	Intron retention	0.01	0	0.03	0.05	0.03	0.09	-0.04	1.07
Supercontig_12.1:155599:156011:+@Supercontig_12.1:156082:157284:+	Intron retention	0.05	0.02	0.1	0.01	0	0.03	0.04	0.24
Supercontig_12.1:1559715:1560630:+@Supercontig_12.1:1560700:1563639:+	Intron retention	0.07	0.02	0.16	0.05	0.02	0.09	0.02	0.11
Supercontig_12.1:1570281:1570857:+@Supercontig_12.1:1570921:1573326:+	Intron retention	0.01	0	0.03	0.03	0.02	0.05	-0.02	0.14
Supercontig_12.1:1576197:1576855:-@Supercontig_12.1:1576057:1576128:-	Intron retention	0.19	0.17	0.21	0.19	0.17	0.21	0	0.04
Supercontig_12.1:158037:159428:+@Supercontig_12.1:159507:159815:+	Intron retention	0.03	0.01	0.06	0.01	0	0.02	0.02	0.1
Supercontig_12.1:1586380:1586456:+@Supercontig_12.1:1586527:1586604:+	Intron retention	0.01	0	0.02	0.01	0	0.02	0	0
Supercontig_12.1:159507:159815:+@Supercontig_12.1:159877:161116:+	Intron retention	0.08	0.05	0.12	0.03	0.01	0.05	0.05	1.19
Supercontig_12.1:1625334:1625553:+@Supercontig_12.1:1625636:1626629:+	Intron retention	0.11	0.01	0.3	0.04	0	0.13	0.07	0.24
Supercontig_12.1:1631484:1632188:-@Supercontig_12.1:1630458:1631408:-	Intron retention	0.01	0	0.02	0.02	0.01	0.03	-0.01	0
Supercontig_12.1:1632815:1633212:+@Supercontig_12.1:1633288:1633702:+	Intron retention	0.01	0	0.02	0.01	0	0.03	0	0
Supercontig_12.1:1634631:1635973:+@Supercontig_12.1:1636048:1637672:+	Intron retention	0.06	0.03	0.1	0.05	0.03	0.1	0.01	0.06
Supercontig_12.1:1660989:1661150:+@Supercontig_12.1:1661209:1661793:+	Intron retention	0.07	0.05	0.1	0.23	0.19	0.27	-0.16	1000000000000
Supercontig_12.1:1666656:1666966:-@Supercontig_12.1:1666305:1666356:-	Intron retention	0.05	0.04	0.05	0.03	0.03	0.04	0.02	11.21
Supercontig_12.1:1674635:1674692:-@Supercontig_12.1:1673395:1674386:-	Intron retention	0.05	0.03	0.06	0.05	0.04	0.06	0	0
Supercontig_12.1:1678561:1678650:-@Supercontig_12.1:1677826:1678474:-	Intron retention	0.04	0.02	0.1	0.07	0.04	0.11	-0.03	0.14
Supercontig_12.1:1683732:1684385:-@Supercontig_12.1:1683548:1683606:-	Intron retention	0.01	0	0.04	0.01	0	0.02	0	0.03
Supercontig_12.1:1688456:1689164:-@Supercontig_12.1:1688227:1688371:-	Intron retention	0.02	0.01	0.03	0.03	0.02	0.04	-0.01	0.03
Supercontig_12.1:1693918:1694696:-@Supercontig_12.1:1690523:1693848:-	Intron retention	0.03	0.02	0.04	0.03	0.02	0.04	0	0
Supercontig_12.1:1698368:1698430:+@Supercontig_12.1:1698488:1698531:+	Intron retention	0.11	0.03	0.24	0.07	0.01	0.17	0.04	0.22
Supercontig_12.1:1711539:1711739:+@Supercontig_12.1:1711832:1711961:+	Intron retention	0.01	0	0.01	0	0	0	0.01	0
Supercontig_12.1:1711832:1711961:+@Supercontig_12.1:1712203:1712341:+	Intron retention	0.01	0.01	0.01	0.08	0.07	0.08	-0.07	1000000000000
Supercontig_12.1:1712203:1712341:+@Supercontig_12.1:1712401:1714654:+	Intron retention	0	0	0	0.01	0.01	0.01	-0.01	0
Supercontig_12.1:171442:171670:-@Supercontig_12.1:169835:171365:-	Intron retention	0.1	0.05	0.17	0.36	0.23	0.5	-0.26	428.44
Supercontig_12.1:171729:171825:-@Supercontig_12.1:171442:171670:-	Intron retention	0.07	0.04	0.12	0.26	0.19	0.35	-0.19	1.77465e+06
Supercontig_12.1:1719351:1719684:+@Supercontig_12.1:1719763:1720680:+	Intron retention	0.16	0.1	0.24	0.26	0.2	0.34	-0.1	0.74
Supercontig_12.1:1720980:1721186:-@Supercontig_12.1:1720671:1720907:-	Intron retention	0.01	0	0.02	0.02	0	0.03	-0.01	0.04
Supercontig_12.1:1721258:1721335:-@Supercontig_12.1:1720980:1721186:-	Intron retention	0.02	0.01	0.04	0.03	0.02	0.05	-0.01	0.04
Supercontig_12.1:1721690:1721863:+@Supercontig_12.1:1721987:1723363:+	Intron retention	0.52	0.44	0.6	0.57	0.49	0.66	-0.05	0.21
Supercontig_12.1:172246:172340:-@Supercontig_12.1:171729:171825:-	Intron retention	0.6	0.55	0.65	0.58	0.51	0.66	0.02	0.12
Supercontig_12.1:172415:172480:-@Supercontig_12.1:172246:172340:-	Intron retention	0.13	0.07	0.2	0.07	0.02	0.14	0.06	0.25
Supercontig_12.1:1736763:1737767:+@Supercontig_12.1:1737839:1739204:+	Intron retention	0.03	0.01	0.09	0.02	0	0.05	0.01	0.06
Supercontig_12.1:173775:173955:+@Supercontig_12.1:174055:174938:+	Intron retention	0.03	0.02	0.04	0.03	0.02	0.04	0	0
Supercontig_12.1:1746594:1747092:+@Supercontig_12.1:1747318:1747643:+	Intron retention	0.07	0.05	0.1	0.1	0.07	0.14	-0.03	0.16
Supercontig_12.1:1747318:1747643:+@Supercontig_12.1:1747865:1748781:+	Intron retention	0.03	0.02	0.05	0.02	0.01	0.03	0.01	0.06
Supercontig_12.1:1747865:1748864:-@Supercontig_12.1:1747318:1747643:-	Intron retention	0.03	0.01	0.05	0.02	0.01	0.03	0.01	0.06
Supercontig_12.1:1750742:1751419:-@Supercontig_12.1:1748851:1750669:-	Intron retention	0.03	0.01	0.06	0.01	0	0.02	0.02	0.15
Supercontig_12.1:1757457:1758498:-@Supercontig_12.1:1756646:1757398:-	Intron retention	0.02	0.01	0.04	0.02	0.01	0.03	0	0
Supercontig_12.1:1761357:1762251:+@Supercontig_12.1:1762309:1762956:+	Intron retention	0.01	0	0.03	0.01	0	0.03	0	0
Supercontig_12.1:1774916:1775567:+@Supercontig_12.1:1775808:1775835:+	Intron retention	0.03	0.02	0.04	0.01	0.01	0.02	0.02	0.17
Supercontig_12.1:1775931:1776113:+@Supercontig_12.1:1776344:1776489:+	Intron retention	0.01	0.01	0.02	0	0	0.01	0.01	0
Supercontig_12.1:1776344:1776489:+@Supercontig_12.1:1776585:1778095:+	Intron retention	0.01	0	0.01	0	0	0	0.01	0
Supercontig_12.1:1784877:1785061:-@Supercontig_12.1:1784245:1784671:-	Intron retention	0.85	0.81	0.89	0.84	0.81	0.87	0.01	0.08
Supercontig_12.1:1787940:1788032:-@Supercontig_12.1:1787273:1787865:-	Intron retention	0	0	0.01	0.01	0.01	0.01	-0.01	0
Supercontig_12.1:1788107:1788184:-@Supercontig_12.1:1787940:1788032:-	Intron retention	0.02	0.01	0.03	0.01	0	0.02	0.01	0
Supercontig_12.1:1788413:1788723:-@Supercontig_12.1:1788107:1788184:-	Intron retention	0	0	0.01	0	0	0	0	0
Supercontig_12.1:1791626:1792107:-@Supercontig_12.1:1791268:1791554:-	Intron retention	0.5	0.29	0.72	0.75	0.56	0.88	-0.25	1.86
Supercontig_12.1:1792217:1792492:-@Supercontig_12.1:1791626:1792107:-	Intron retention	0.41	0.26	0.58	0.13	0.05	0.25	0.28	6.55
Supercontig_12.1:1800626:1800837:-@Supercontig_12.1:1799279:1800564:-	Intron retention	0	0	0	0	0	0.01	0	0
Supercontig_12.1:1801941:1801973:-@Supercontig_12.1:1800912:1801256:-	Intron retention	0.73	0.72	0.75	0.57	0.56	0.59	0.16	1000000000000
Supercontig_12.1:1802110:1802189:-@Supercontig_12.1:1800912:1801973:-	Intron retention	0.06	0.05	0.07	0.05	0.04	0.06	0.01	0
Supercontig_12.1:1802110:1802189:-@Supercontig_12.1:1801941:1801973:-	Intron retention	0.09	0.07	0.11	0.06	0.05	0.07	0.03	0.49
Supercontig_12.1:1802266:1802672:-@Supercontig_12.1:1802110:1802189:-	Intron retention	0.13	0.11	0.15	0.08	0.07	0.1	0.05	17.39
Supercontig_12.1:1805250:1805567:-@Supercontig_12.1:1803333:1805195:-	Intron retention	0.46	0.32	0.62	0.59	0.39	0.77	-0.13	0.54
Supercontig_12.1:1805630:1805817:-@Supercontig_12.1:1805250:1805567:-	Intron retention	0.96	0.87	1	0.88	0.71	0.97	0.08	0.31
Supercontig_12.1:1812755:1813057:-@Supercontig_12.1:1811262:1812690:-	Intron retention	0.33	0.24	0.43	0.38	0.26	0.5	-0.05	0.26
Supercontig_12.1:1827414:1828373:+@Supercontig_12.1:1828462:1828871:+	Intron retention	0.13	0.09	0.17	0.11	0.08	0.15	0.02	0.08
Supercontig_12.1:1832020:1832723:+@Supercontig_12.1:1832780:1833473:+	Intron retention	0.1	0.06	0.14	0.13	0.09	0.16	-0.03	0.13
Supercontig_12.1:1837802:1837872:-@Supercontig_12.1:1836873:1837697:-	Intron retention	0	0	0	0	0	0	0	0
Supercontig_12.1:1837802:1837872:-@Supercontig_12.1:1837039:1837697:-	Intron retention	0	0	0	0	0	0	0	0
Supercontig_12.1:1838004:1838039:-@Supercontig_12.1:1837802:1837872:-	Intron retention	0.16	0.14	0.18	0.07	0.06	0.08	0.09	1000000000000
Supercontig_12.1:1838342:1838466:-@Supercontig_12.1:1838102:1838129:-	Intron retention	0.3	0.24	0.35	0.25	0.21	0.28	0.05	0.24
Supercontig_12.1:1843662:1846880:+@Supercontig_12.1:1846944:1847697:+	Intron retention	0.01	0	0.03	0.01	0	0.02	0	0
Supercontig_12.1:1848061:1849224:+@Supercontig_12.1:1849278:1849371:+	Intron retention	0.08	0.03	0.18	0.04	0.01	0.1	0.04	0.15
Supercontig_12.1:1851835:1852002:-@Supercontig_12.1:1851072:1851685:-	Intron retention	0.01	0	0.01	0.01	0.01	0.01	0	0
Supercontig_12.1:1851835:1852002:-@Supercontig_12.1:1851355:1851685:-	Intron retention	0.01	0	0.01	0.01	0.01	0.01	0	0
Supercontig_12.1:1852293:1852317:-@Supercontig_12.1:1851835:1852002:-	Intron retention	0.04	0.03	0.04	0.04	0.03	0.04	0	0
Supercontig_12.1:1852293:1852600:-@Supercontig_12.1:1851835:1852002:-	Intron retention	0.03	0.03	0.04	0.03	0.03	0.04	0	0
Supercontig_12.1:1852405:1852772:-@Supercontig_12.1:1852293:1852317:-	Intron retention	0.1	0.09	0.11	0.03	0.03	0.04	0.07	1000000000000
Supercontig_12.1:1869292:1872328:-@Supercontig_12.1:1868552:1869189:-	Intron retention	0.07	0.04	0.1	0.06	0.04	0.09	0.01	0.05
Supercontig_12.1:1873289:1874351:+@Supercontig_12.1:1874432:1874915:+	Intron retention	0.04	0.02	0.06	0.04	0.02	0.06	0	0.03
Supercontig_12.1:1874432:1874915:+@Supercontig_12.1:1874979:1875362:+	Intron retention	0.02	0.01	0.04	0.01	0	0.02	0.01	0.1
Supercontig_12.1:1885580:1886059:-@Supercontig_12.1:1884107:1885177:-	Intron retention	0.09	0.06	0.13	0.13	0.1	0.16	-0.04	0.22
Supercontig_12.1:1897863:1897961:-@Supercontig_12.1:1896783:1897748:-	Intron retention	0.01	0.01	0.01	0.02	0.02	0.02	-0.01	1000000000000
Supercontig_12.1:1898152:1898329:-@Supercontig_12.1:1897863:1897961:-	Intron retention	0.12	0.11	0.13	0.13	0.13	0.14	-0.01	0.12
Supercontig_12.1:1898407:1898633:+@Supercontig_12.1:1898693:1898740:+	Intron retention	0.01	0.01	0.01	0.02	0.01	0.03	-0.01	0.34
Supercontig_12.1:1907323:1907634:+@Supercontig_12.1:1907755:1908815:+	Intron retention	0.04	0.03	0.06	0.03	0.01	0.04	0.01	0.06
Supercontig_12.1:1931911:1933138:+@Supercontig_12.1:1933343:1936267:+	Intron retention	0.23	0.2	0.27	0.15	0.12	0.18	0.08	18.2
Supercontig_12.1:1940447:1942493:-@Supercontig_12.1:1940239:1940362:-	Intron retention	0.02	0.01	0.03	0.02	0.01	0.03	0	0
Supercontig_12.1:1950860:1951486:-@Supercontig_12.1:1948134:1950793:-	Intron retention	0.75	0.69	0.81	0.84	0.8	0.88	-0.09	1.98
Supercontig_12.1:1951550:1951634:-@Supercontig_12.1:1948134:1951486:-	Intron retention	0.36	0.29	0.44	0.43	0.37	0.5	-0.07	0.3
Supercontig_12.1:1951550:1951634:-@Supercontig_12.1:1950860:1951486:-	Intron retention	0.34	0.27	0.41	0.39	0.33	0.46	-0.05	0.22
Supercontig_12.1:1975923:1976166:-@Supercontig_12.1:1972975:1975470:-	Intron retention	0.34	0.29	0.4	0.33	0.28	0.38	0.01	0.11
Supercontig_12.1:1983491:1983562:+@Supercontig_12.1:1983651:1984521:+	Intron retention	0.06	0.03	0.08	0.02	0.01	0.04	0.04	0.64
Supercontig_12.1:1986422:1986519:-@Supercontig_12.1:1986026:1986368:-	Intron retention	0.02	0	0.04	0.01	0	0.02	0.01	0.04
Supercontig_12.1:1986585:1986721:-@Supercontig_12.1:1986422:1986519:-	Intron retention	0.01	0	0.03	0.01	0	0.02	0	0
Supercontig_12.1:1987099:1987243:-@Supercontig_12.1:1986899:1987013:-	Intron retention	0.09	0.06	0.13	0.1	0.07	0.14	-0.01	0.08
Supercontig_12.1:1987301:1987890:-@Supercontig_12.1:1987099:1987243:-	Intron retention	0.01	0	0.02	0.02	0	0.04	-0.01	0.03
Supercontig_12.1:2006192:2006600:-@Supercontig_12.1:2005123:2005926:-	Intron retention	0.05	0.03	0.08	0.06	0.04	0.08	-0.01	0.05
Supercontig_12.1:2006192:2006615:-@Supercontig_12.1:2005123:2005923:-	Intron retention	0.07	0.04	0.1	0.06	0.04	0.09	0.01	0.06
Supercontig_12.1:2022855:2022969:+@Supercontig_12.1:2023034:2023194:+	Intron retention	0.2	0.11	0.3	0.05	0.01	0.1	0.15	4.38
Supercontig_12.1:2023449:2023456:+@Supercontig_12.1:2023635:2023721:+	Intron retention	0.7	0.38	0.93	0.94	0.77	1	-0.24	1.32
Supercontig_12.1:2035932:2036275:+@Supercontig_12.1:2036375:2036701:+	Intron retention	0.02	0.01	0.02	0.02	0.01	0.02	0	0
Supercontig_12.1:2036375:2036701:+@Supercontig_12.1:2036787:2036912:+	Intron retention	0.05	0.04	0.07	0.02	0.02	0.03	0.03	62.18
Supercontig_12.1:2036787:2036912:+@Supercontig_12.1:2036969:2037013:+	Intron retention	0.01	0	0.01	0.02	0.01	0.04	-0.01	0.64
Supercontig_12.1:2036969:2037013:+@Supercontig_12.1:2037076:2037982:+	Intron retention	0.02	0.01	0.04	0.05	0.03	0.07	-0.03	0.31
Supercontig_12.1:2045746:2046067:-@Supercontig_12.1:2044910:2045644:-	Intron retention	0.07	0.05	0.1	0.1	0.08	0.13	-0.03	0.19
Supercontig_12.1:2046688:2047027:-@Supercontig_12.1:2046210:2046556:-	Intron retention	0.36	0.33	0.39	0.32	0.3	0.35	0.04	0.26
Supercontig_12.1:2051649:2053393:+@Supercontig_12.1:2053628:2054039:+	Intron retention	0.04	0.03	0.05	0.03	0.02	0.04	0.01	0.05
Supercontig_12.1:2073280:2073958:-@Supercontig_12.1:2069608:2073182:-	Intron retention	0.09	0.05	0.15	0.17	0.11	0.24	-0.08	0.46
Supercontig_12.1:2078296:2078564:+@Supercontig_12.1:2078713:2078740:+	Intron retention	0.14	0.07	0.24	0.03	0	0.08	0.11	1.24
Supercontig_12.1:2082506:2082748:+@Supercontig_12.1:2082839:2083387:+	Intron retention	0.11	0.09	0.12	0.03	0.02	0.04	0.08	1000000000000
Supercontig_12.1:2082839:2083387:+@Supercontig_12.1:2083476:2083718:+	Intron retention	0.01	0	0.02	0.01	0	0.03	0	0
Supercontig_12.1:2086067:2086399:-@Supercontig_12.1:2085202:2085999:-	Intron retention	0.02	0.01	0.04	0.02	0.01	0.04	0	0.03
Supercontig_12.1:2088315:2089001:-@Supercontig_12.1:2087888:2088198:-	Intron retention	0.03	0.02	0.04	0.02	0.01	0.03	0.01	0.09
Supercontig_12.1:2102000:2102674:+@Supercontig_12.1:2102734:2103162:+	Intron retention	0.02	0	0.05	0.04	0.02	0.07	-0.02	0.09
Supercontig_12.1:2102073:2102230:+@Supercontig_12.1:2102450:2102674:+	Intron retention	0.58	0.48	0.68	0.54	0.43	0.64	0.04	0.23
Supercontig_12.1:2102450:2102674:+@Supercontig_12.1:2102734:2103162:+	Intron retention	0.02	0	0.04	0.03	0.01	0.06	-0.01	0.09
Supercontig_12.1:2102734:2103162:+@Supercontig_12.1:2103251:2104262:+	Intron retention	0.4	0.35	0.46	0.16	0.12	0.21	0.24	1000000000000
Supercontig_12.1:2102734:2103162:+@Supercontig_12.1:2103251:2104394:+	Intron retention	0.41	0.36	0.46	0.17	0.12	0.21	0.24	1000000000000
Supercontig_12.1:2113962:2116741:+@Supercontig_12.1:2116805:2117502:+	Intron retention	0.62	0.57	0.67	0.57	0.52	0.62	0.05	0.21
Supercontig_12.1:2119037:2119632:+@Supercontig_12.1:2119907:2120964:+	Intron retention	0.05	0.04	0.06	0.04	0.04	0.05	0.01	0
Supercontig_12.1:2129488:2129631:-@Supercontig_12.1:2128881:2129425:-	Intron retention	0.05	0.01	0.09	0.01	0	0.02	0.04	0.24
Supercontig_12.1:2160760:2161512:-@Supercontig_12.1:2159810:2160696:-	Intron retention	0	0	0.01	0	0	0.01	0	0
Supercontig_12.1:2162013:2162905:-@Supercontig_12.1:2161881:2161951:-	Intron retention	0.13	0.08	0.19	0.14	0.1	0.18	-0.01	0.09
Supercontig_12.1:2170139:2170193:-@Supercontig_12.1:2168981:2170076:-	Intron retention	0.02	0	0.06	0.01	0	0.03	0.01	0.04
Supercontig_12.1:2170139:2171553:-@Supercontig_12.1:2168981:2170076:-	Intron retention	0.02	0	0.05	0.01	0	0.03	0.01	0.04
Supercontig_12.1:2170367:2170498:-@Supercontig_12.1:2170139:2170193:-	Intron retention	0.89	0.82	0.94	0.88	0.84	0.92	0.01	0.09
Supercontig_12.1:2177486:2178011:+@Supercontig_12.1:2178070:2180893:+	Intron retention	0.05	0.03	0.09	0.07	0.04	0.12	-0.02	0.08
Supercontig_12.1:2191899:2192181:-@Supercontig_12.1:2190761:2191528:-	Intron retention	0.56	0.48	0.63	0.71	0.63	0.79	-0.15	5.64
Supercontig_12.1:2192244:2194310:-@Supercontig_12.1:2191899:2192181:-	Intron retention	0.08	0.03	0.14	0.14	0.07	0.25	-0.06	0.27
Supercontig_12.1:2195247:2195686:+@Supercontig_12.1:2195747:2196839:+	Intron retention	0.03	0.02	0.05	0.01	0.01	0.03	0.02	0.15
Supercontig_12.1:2195544:2195686:+@Supercontig_12.1:2195747:2196839:+	Intron retention	0.03	0.02	0.04	0.01	0	0.02	0.02	0.14
Supercontig_12.1:2195747:2196839:+@Supercontig_12.1:2196913:2197994:+	Intron retention	0	0	0	0	0	0	0	0
Supercontig_12.1:2195747:2196839:+@Supercontig_12.1:2196913:2198636:+	Intron retention	0	0	0	0	0	0	0	0
Supercontig_12.1:2234693:2234709:-@Supercontig_12.1:2234389:2234594:-	Intron retention	0.35	0.3	0.4	0.53	0.49	0.58	-0.18	2.56508e+10
Supercontig_12.1:2234832:2235079:-@Supercontig_12.1:2234693:2234709:-	Intron retention	0.01	0.01	0.03	0.01	0.01	0.02	0	0
Supercontig_12.1:2250091:2250631:-@Supercontig_12.1:2248780:2249831:-	Intron retention	0.07	0.05	0.09	0.03	0.02	0.03	0.04	5.20436e+07
Supercontig_12.1:2250830:2251808:+@Supercontig_12.1:2251972:2252049:+	Intron retention	0.03	0.02	0.05	0.02	0.01	0.04	0.01	0.04
Supercontig_12.1:2251455:2251808:+@Supercontig_12.1:2251972:2252049:+	Intron retention	0.02	0.01	0.03	0.02	0.01	0.03	0	0
Supercontig_12.1:2251972:2252049:+@Supercontig_12.1:2252310:2253518:+	Intron retention	0.05	0.03	0.07	0.02	0.02	0.04	0.03	0.37
Supercontig_12.1:2252310:2253518:+@Supercontig_12.1:2253591:2253705:+	Intron retention	0.05	0.02	0.1	0.04	0.01	0.08	0.01	0.07
Supercontig_12.1:2266607:2266864:-@Supercontig_12.1:2265841:2266508:-	Intron retention	0.23	0.1	0.4	0.31	0.13	0.53	-0.08	0.39
Supercontig_12.1:2346496:2346855:+@Supercontig_12.1:2346912:2346991:+	Intron retention	0.53	0.18	0.9	0.09	0	0.3	0.44	2.86
Supercontig_12.1:2352809:2353521:-@Supercontig_12.1:2351882:2352735:-	Intron retention	0.13	0.07	0.21	0.14	0.1	0.2	-0.01	0.13
Supercontig_12.1:2353607:2353905:-@Supercontig_12.1:2352809:2353521:-	Intron retention	0.08	0.03	0.14	0.02	0	0.07	0.06	0.46
Supercontig_12.1:2354712:2354983:-@Supercontig_12.1:2353983:2354625:-	Intron retention	0.48	0.29	0.7	0.37	0.24	0.54	0.11	0.46
Supercontig_12.1:2354716:2354739:-@Supercontig_12.1:2353983:2354625:-	Intron retention	0.26	0.16	0.39	0.27	0.17	0.38	-0.01	0.21
Supercontig_12.1:2355509:2355562:-@Supercontig_12.1:2355056:2355369:-	Intron retention	0.14	0.06	0.26	0.88	0.69	1	-0.74	1000000000000
Supercontig_12.1:2356779:2356833:+@Supercontig_12.1:2356892:2357920:+	Intron retention	0.07	0.01	0.17	0.03	0	0.07	0.04	0.15
Supercontig_12.1:2358820:2359582:+@Supercontig_12.1:2359642:2359757:+	Intron retention	0.84	0.59	1	0.13	0.08	0.19	0.71	1000000000000
Supercontig_12.1:2359053:2359582:+@Supercontig_12.1:2359642:2359757:+	Intron retention	0.79	0.56	0.98	0.13	0.08	0.19	0.66	1000000000000
Supercontig_12.1:235978:237045:-@Supercontig_12.1:235569:235880:-	Intron retention	0.02	0.01	0.04	0.02	0.01	0.04	0	0
Supercontig_12.1:238034:238084:+@Supercontig_12.1:238147:238578:+	Intron retention	0	0	0	0	0	0	0	0
Supercontig_12.1:2380367:2381643:-@Supercontig_12.1:2380211:2380304:-	Intron retention	0	0	0.01	0.02	0.01	0.04	-0.02	0.11
Supercontig_12.1:2408377:2408493:-@Supercontig_12.1:2408083:2408308:-	Intron retention	0	0	0.01	0.01	0	0.01	-0.01	0
Supercontig_12.1:2408799:2409185:-@Supercontig_12.1:2408569:2408644:-	Intron retention	0.17	0.14	0.19	0.08	0.07	0.1	0.09	1000000000000
Supercontig_12.1:2411553:2411650:+@Supercontig_12.1:2411727:2411759:+	Intron retention	0.02	0.01	0.06	0.1	0.03	0.18	-0.08	0.39
Supercontig_12.1:2411553:2411650:+@Supercontig_12.1:2411727:2412083:+	Intron retention	0.03	0.01	0.05	0.05	0.02	0.08	-0.02	0.06
Supercontig_12.1:2411727:2411759:+@Supercontig_12.1:2411814:2412083:+	Intron retention	0.99	0.97	1	0.99	0.97	1	0	0
Supercontig_12.1:2429630:2429762:-@Supercontig_12.1:2428436:2429435:-	Intron retention	0.04	0.03	0.05	0.04	0.03	0.04	0	0
Supercontig_12.1:2431129:2431249:+@Supercontig_12.1:2431392:2432035:+	Intron retention	0.03	0.02	0.05	0.04	0.03	0.06	-0.01	0.06
Supercontig_12.1:2433181:2433282:-@Supercontig_12.1:2432597:2433081:-	Intron retention	0.01	0	0.01	0.01	0	0.01	0	0
Supercontig_12.1:2433426:2433504:-@Supercontig_12.1:2433181:2433282:-	Intron retention	0.02	0.01	0.03	0.02	0.02	0.03	0	0
Supercontig_12.1:2437704:2438228:+@Supercontig_12.1:2438287:2438850:+	Intron retention	0	0	0.01	0	0	0.01	0	0
Supercontig_12.1:2459192:2459449:+@Supercontig_12.1:2459513:2459632:+	Intron retention	0.68	0.64	0.71	0.53	0.49	0.57	0.15	4.07536e+06
Supercontig_12.1:2478016:2478712:+@Supercontig_12.1:2478784:2480713:+	Intron retention	0.18	0.03	0.41	0.08	0.01	0.25	0.1	0.29
Supercontig_12.1:2496519:2496721:+@Supercontig_12.1:2496886:2497862:+	Intron retention	0.01	0	0.02	0.02	0.01	0.03	-0.01	0
Supercontig_12.1:2496886:2497862:+@Supercontig_12.1:2497929:2498642:+	Intron retention	0.01	0	0.03	0.01	0	0.01	0	0
Supercontig_12.1:2499249:2499891:-@Supercontig_12.1:2498743:2499118:-	Intron retention	0.08	0.05	0.12	0.11	0.07	0.15	-0.03	0.1
Supercontig_12.1:2499975:2500035:-@Supercontig_12.1:2499249:2499891:-	Intron retention	0.18	0.13	0.23	0.17	0.13	0.23	0.01	0.09
Supercontig_12.1:2500112:2500529:-@Supercontig_12.1:2499975:2500035:-	Intron retention	0.06	0.04	0.08	0.08	0.04	0.11	-0.02	0.06
Supercontig_12.1:2501529:2502205:+@Supercontig_12.1:2502302:2503493:+	Intron retention	0.12	0.1	0.14	0.1	0.08	0.13	0.02	0.05
Supercontig_12.1:2504268:2504492:+@Supercontig_12.1:2504692:2505639:+	Intron retention	0.01	0	0.01	0.01	0.01	0.02	0	0
Supercontig_12.1:2520180:2520783:-@Supercontig_12.1:2519468:2520120:-	Intron retention	0.06	0.02	0.12	0.13	0.06	0.21	-0.07	0.29
Supercontig_12.1:2536364:2536690:+@Supercontig_12.1:2536766:2538927:+	Intron retention	0.39	0.25	0.55	0.29	0.18	0.41	0.1	0.41
Supercontig_12.1:2542722:2543356:-@Supercontig_12.1:2541769:2542625:-	Intron retention	0.04	0.02	0.07	0.06	0.04	0.1	-0.02	0.08
Supercontig_12.1:2557523:2557625:+@Supercontig_12.1:2557689:2557833:+	Intron retention	0.01	0	0.01	0	0	0	0.01	0
Supercontig_12.1:2557689:2557833:+@Supercontig_12.1:2557941:2559159:+	Intron retention	0.06	0.06	0.07	0.1	0.1	0.1	-0.04	1000000000000
Supercontig_12.1:2567171:2567359:+@Supercontig_12.1:2567429:2567944:+	Intron retention	0.05	0.03	0.09	0.01	0	0.02	0.04	34.1
Supercontig_12.1:2567429:2567944:+@Supercontig_12.1:2568008:2568165:+	Intron retention	0.02	0.01	0.05	0.01	0.01	0.03	0.01	0
Supercontig_12.1:2577836:2578576:-@Supercontig_12.1:2577476:2577720:-	Intron retention	0.02	0.02	0.03	0.01	0	0.01	0.01	19.01
Supercontig_12.1:2578645:2578742:-@Supercontig_12.1:2577836:2578576:-	Intron retention	0.02	0.01	0.03	0.01	0	0.02	0.01	0
Supercontig_12.1:2579239:2579423:-@Supercontig_12.1:2578929:2579060:-	Intron retention	0.02	0.01	0.03	0.04	0.03	0.05	-0.02	0.12
Supercontig_12.1:2580351:2580869:-@Supercontig_12.1:2579582:2580289:-	Intron retention	0	0	0	0	0	0	0	0
Supercontig_12.1:2581193:2581781:-@Supercontig_12.1:2580351:2580869:-	Intron retention	0.01	0	0.01	0	0	0	0.01	0
Supercontig_12.1:2581845:2581901:-@Supercontig_12.1:2581193:2581781:-	Intron retention	0	0	0	0	0	0	0	0
Supercontig_12.1:2598003:2598217:+@Supercontig_12.1:2598444:2598985:+	Intron retention	0.01	0.01	0.02	0.02	0.01	0.02	-0.01	0
Supercontig_12.1:2598444:2598985:+@Supercontig_12.1:2599046:2599740:+	Intron retention	0.02	0.01	0.03	0.01	0.01	0.02	0.01	0
Supercontig_12.1:2609000:2609315:+@Supercontig_12.1:2609376:2610704:+	Intron retention	0.82	0.54	0.99	0.06	0.01	0.17	0.76	4.9051e+11
Supercontig_12.1:2614347:2615489:+@Supercontig_12.1:2615922:2616149:+	Intron retention	0.43	0.29	0.58	0.14	0.07	0.21	0.29	220.84
Supercontig_12.1:2627233:2628406:-@Supercontig_12.1:2626166:2627058:-	Intron retention	0.07	0.05	0.09	0.1	0.07	0.14	-0.03	0.2
Supercontig_12.1:2636604:2637669:-@Supercontig_12.1:2636064:2636533:-	Intron retention	0.08	0.05	0.11	0.05	0.03	0.07	0.03	0.2
Supercontig_12.1:2637737:2637873:-@Supercontig_12.1:2636604:2637669:-	Intron retention	0.07	0.04	0.12	0.05	0.03	0.08	0.02	0.08
Supercontig_12.1:2639778:2639839:-@Supercontig_12.1:2639075:2639673:-	Intron retention	0.03	0.02	0.05	0.05	0.04	0.08	-0.02	0.16
Supercontig_12.1:2643997:2644086:-@Supercontig_12.1:2643792:2643915:-	Intron retention	0.25	0.12	0.41	0.15	0.06	0.28	0.1	0.39
Supercontig_12.1:2644851:2644994:+@Supercontig_12.1:2645053:2646336:+	Intron retention	0.01	0	0.03	0.04	0.01	0.09	-0.03	0.15
Supercontig_12.1:2644915:2644994:+@Supercontig_12.1:2645053:2646336:+	Intron retention	0.01	0	0.04	0.05	0.01	0.09	-0.04	0.15
Supercontig_12.1:2648817:2649836:+@Supercontig_12.1:2649995:2650736:+	Intron retention	0.01	0.01	0.02	0.01	0.01	0.01	0	0
Supercontig_12.1:2649995:2650736:+@Supercontig_12.1:2650821:2651186:+	Intron retention	0.01	0.01	0.02	0.03	0.02	0.04	-0.02	0.14
Supercontig_12.1:2656043:2656311:-@Supercontig_12.1:2654272:2655980:-	Intron retention	0.01	0	0.02	0.04	0.02	0.07	-0.03	4.82
Supercontig_12.1:2664826:2664927:-@Supercontig_12.1:2664501:2664741:-	Intron retention	0.02	0.02	0.03	0.02	0.02	0.03	0	0
Supercontig_12.1:2665008:2665220:-@Supercontig_12.1:2664826:2664927:-	Intron retention	0.01	0.01	0.02	0.03	0.03	0.04	-0.02	123.9
Supercontig_12.1:2672171:2673022:-@Supercontig_12.1:2671441:2672113:-	Intron retention	0.01	0	0.02	0.01	0	0.01	0	0
Supercontig_12.1:2674481:2675121:+@Supercontig_12.1:2676464:2676586:+	Intron retention	0.62	0.6	0.65	0.53	0.51	0.55	0.09	1000000000000
Supercontig_12.1:2676663:2676688:+@Supercontig_12.1:2676758:2677168:+	Intron retention	0.01	0	0.01	0	0	0	0.01	0
Supercontig_12.1:2676758:2677168:+@Supercontig_12.1:2677226:2677680:+	Intron retention	0	0	0	0	0	0	0	0
Supercontig_12.1:2695943:2696020:-@Supercontig_12.1:2695202:2695887:-	Intron retention	0.01	0	0.01	0	0	0	0.01	0
Supercontig_12.1:2696150:2696275:-@Supercontig_12.1:2695943:2696020:-	Intron retention	0.02	0.01	0.03	0.01	0.01	0.02	0.01	0
Supercontig_12.1:2696416:2696665:-@Supercontig_12.1:2696150:2696275:-	Intron retention	0	0	0	0	0	0	0	0
Supercontig_12.1:2698771:2698981:+@Supercontig_12.1:2699036:2700439:+	Intron retention	0.02	0	0.05	0.04	0.01	0.09	-0.02	0.1
Supercontig_12.1:2718831:2718931:-@Supercontig_12.1:2718169:2718760:-	Intron retention	0.01	0.01	0.02	0.02	0.01	0.03	-0.01	0
Supercontig_12.1:2719018:2719748:-@Supercontig_12.1:2718831:2718931:-	Intron retention	0.01	0.01	0.03	0.03	0.01	0.04	-0.02	0.05
Supercontig_12.1:2724814:2724870:+@Supercontig_12.1:2724933:2725145:+	Intron retention	0.02	0	0.05	0.05	0.02	0.09	-0.03	0.15
Supercontig_12.1:2747997:2748546:+@Supercontig_12.1:2748722:2749695:+	Intron retention	0.23	0.18	0.28	0.19	0.16	0.24	0.04	0.14
Supercontig_12.1:2748722:2749695:+@Supercontig_12.1:2749765:2750111:+	Intron retention	0.03	0.01	0.05	0.05	0.03	0.08	-0.02	0.19
Supercontig_12.1:2750749:2753157:-@Supercontig_12.1:2749987:2750672:-	Intron retention	0	0	0.01	0	0	0.01	0	0
Supercontig_12.1:2753408:2753553:-@Supercontig_12.1:2753318:2753344:-	Intron retention	0.01	0	0.03	0.01	0	0.02	0	0
Supercontig_12.1:2753816:2754882:-@Supercontig_12.1:2753408:2753553:-	Intron retention	0.02	0.01	0.03	0.02	0.01	0.03	0	0
Supercontig_12.1:2756920:2757048:-@Supercontig_12.1:2756023:2756774:-	Intron retention	0.19	0.09	0.32	0.33	0.18	0.5	-0.14	0.61
Supercontig_12.1:2758966:2759292:-@Supercontig_12.1:2757734:2758895:-	Intron retention	0.65	0.49	0.8	0.82	0.66	0.94	-0.17	0.86
Supercontig_12.1:2759368:2760438:-@Supercontig_12.1:2758966:2759292:-	Intron retention	0.16	0.03	0.43	0.1	0.02	0.2	0.06	0.27
Supercontig_12.1:2759368:2760497:-@Supercontig_12.1:2757732:2759292:-	Intron retention	0.19	0.04	0.58	0.08	0.03	0.17	0.11	0.3
Supercontig_12.1:2763858:2764207:-@Supercontig_12.1:2763654:2763791:-	Intron retention	0.01	0	0.02	0.03	0.02	0.06	-0.02	0.74
Supercontig_12.1:2765268:2765672:+@Supercontig_12.1:2765763:2766052:+	Intron retention	0.43	0.32	0.54	0.38	0.3	0.47	0.05	0.22
Supercontig_12.1:2776199:2776892:-@Supercontig_12.1:2774601:2776063:-	Intron retention	0.03	0.01	0.05	0.05	0.03	0.07	-0.02	0.1
Supercontig_12.1:2781582:2782445:+@Supercontig_12.1:2782530:2782574:+	Intron retention	0.03	0	0.09	0.01	0	0.03	0.02	0.08
Supercontig_12.1:2782337:2782445:+@Supercontig_12.1:2782530:2782574:+	Intron retention	0.12	0.02	0.27	0.02	0	0.08	0.1	0.36
Supercontig_12.1:2784723:2785028:+@Supercontig_12.1:2785110:2785213:+	Intron retention	0.14	0.09	0.2	0.11	0.08	0.16	0.03	0.12
Supercontig_12.1:2787441:2787554:-@Supercontig_12.1:2786485:2787380:-	Intron retention	0.07	0.05	0.1	0.07	0.04	0.12	0	0.06
Supercontig_12.1:2787758:2787799:-@Supercontig_12.1:2787441:2787554:-	Intron retention	0.11	0.05	0.19	0.26	0.17	0.38	-0.15	1.95
Supercontig_12.1:2787908:2788548:-@Supercontig_12.1:2787758:2787799:-	Intron retention	0.05	0.02	0.08	0.02	0.01	0.05	0.03	0.12
Supercontig_12.1:2793525:2794222:-@Supercontig_12.1:2793348:2793448:-	Intron retention	0.02	0	0.05	0.02	0	0.05	0	0.04
Supercontig_12.1:2793525:2794724:-@Supercontig_12.1:2793348:2793448:-	Intron retention	0.02	0	0.05	0.02	0.01	0.05	0	0.05
Supercontig_12.1:2794554:2794695:-@Supercontig_12.1:2793525:2794222:-	Intron retention	0.33	0.26	0.41	0.45	0.38	0.53	-0.12	1.62
Supercontig_12.1:2795603:2795662:-@Supercontig_12.1:2795127:2795527:-	Intron retention	0.16	0.1	0.22	0.13	0.06	0.21	0.03	0.16
Supercontig_12.1:2795739:2796048:-@Supercontig_12.1:2795603:2795662:-	Intron retention	0.14	0.09	0.21	0.27	0.17	0.38	-0.13	1.02
Supercontig_12.1:2804910:2805554:+@Supercontig_12.1:2805742:2806014:+	Intron retention	0.09	0.04	0.16	0.1	0.06	0.15	-0.01	0.11
Supercontig_12.1:2808952:2809176:+@Supercontig_12.1:2809332:2810355:+	Intron retention	0.22	0.11	0.37	0.54	0.38	0.72	-0.32	20.41
Supercontig_12.1:2808952:2809229:+@Supercontig_12.1:2809332:2810355:+	Intron retention	0.22	0.1	0.39	0.22	0.05	0.51	0	0.36
Supercontig_12.1:2815838:2816186:+@Supercontig_12.1:2816257:2817930:+	Intron retention	0.78	0.45	0.99	0.72	0.48	0.87	0.06	0.5
Supercontig_12.1:2819581:2819859:-@Supercontig_12.1:2817562:2819526:-	Intron retention	0.01	0	0.02	0.02	0.01	0.03	-0.01	0
Supercontig_12.1:2820652:2820979:-@Supercontig_12.1:2819917:2820593:-	Intron retention	0.02	0	0.04	0.04	0.02	0.07	-0.02	0.08
Supercontig_12.1:2828051:2828210:+@Supercontig_12.1:2828305:2828516:+	Intron retention	0.14	0.09	0.2	0.11	0.08	0.16	0.03	0.12
Supercontig_12.1:2828223:2828516:+@Supercontig_12.1:2828642:2829151:+	Intron retention	0.03	0.02	0.04	0.01	0.01	0.02	0.02	0.17
Supercontig_12.1:2828305:2828516:+@Supercontig_12.1:2828642:2829151:+	Intron retention	0.03	0.02	0.04	0.01	0.01	0.02	0.02	0.22
Supercontig_12.1:2828642:2829064:-@Supercontig_12.1:2828305:2828516:-	Intron retention	0.03	0.02	0.04	0.01	0.01	0.02	0.02	0.16
Supercontig_12.1:2834860:2836777:-@Supercontig_12.1:2833932:2834783:-	Intron retention	0.14	0.07	0.23	0.12	0.06	0.19	0.02	0.14
Supercontig_12.1:2838364:2839222:-@Supercontig_12.1:2837782:2838303:-	Intron retention	0.08	0.04	0.12	0.12	0.07	0.17	-0.04	0.26
Supercontig_12.1:2838364:2839225:-@Supercontig_12.1:2838039:2838303:-	Intron retention	0.07	0.04	0.12	0.12	0.07	0.18	-0.05	0.21
Supercontig_12.1:2839279:2840420:-@Supercontig_12.1:2838364:2839222:-	Intron retention	0.01	0	0.04	0.03	0.01	0.06	-0.02	0.1
Supercontig_12.1:2839279:2840420:-@Supercontig_12.1:2838364:2839225:-	Intron retention	0.02	0	0.06	0.04	0.01	0.08	-0.02	0.07
Supercontig_12.1:2843498:2845867:+@Supercontig_12.1:2845959:2846420:+	Intron retention	0.02	0.01	0.04	0.02	0.01	0.03	0	0.04
Supercontig_12.1:2857079:2857799:+@Supercontig_12.1:2857864:2858294:+	Intron retention	0.05	0.04	0.06	0.03	0.02	0.04	0.02	0.13
Supercontig_12.1:2864783:2865021:+@Supercontig_12.1:2865082:2866038:+	Intron retention	0	0	0.01	0	0	0	0	0
Supercontig_12.1:2869426:2869561:-@Supercontig_12.1:2868281:2869167:-	Intron retention	0.17	0.1	0.26	0.11	0.06	0.19	0.06	0.23
Supercontig_12.1:2871246:2871316:+@Supercontig_12.1:2871439:2871785:+	Intron retention	0.01	0.01	0.02	0.02	0.02	0.03	-0.01	0.26
Supercontig_12.1:2873089:2873288:-@Supercontig_12.1:2872572:2872990:-	Intron retention	0.03	0.01	0.06	0.08	0.05	0.12	-0.05	0.5
Supercontig_12.1:2877846:2877932:+@Supercontig_12.1:2877986:2878864:+	Intron retention	0.02	0.01	0.03	0.01	0.01	0.02	0.01	0
Supercontig_12.1:2882289:2882852:+@Supercontig_12.1:2882969:2883365:+	Intron retention	0.92	0.87	0.95	0.95	0.91	0.97	-0.03	0.09
Supercontig_12.1:2882289:2883365:+@Supercontig_12.1:2883427:2883628:+	Intron retention	0.03	0.01	0.06	0.01	0	0.03	0.02	0.07
Supercontig_12.1:2882969:2883365:+@Supercontig_12.1:2883427:2883628:+	Intron retention	0.03	0.01	0.07	0.01	0	0.04	0.02	0.08
Supercontig_12.1:2898039:2898359:+@Supercontig_12.1:2898545:2899075:+	Intron retention	0.79	0.71	0.86	0.92	0.85	0.97	-0.13	5.24
Supercontig_12.1:2898039:2899075:+@Supercontig_12.1:2899317:2899582:+	Intron retention	0.37	0.29	0.44	0.17	0.11	0.22	0.2	6132.26
Supercontig_12.1:2898545:2899075:+@Supercontig_12.1:2899317:2899582:+	Intron retention	0.36	0.29	0.44	0.16	0.11	0.22	0.2	223.82
Supercontig_12.1:2904235:2904296:-@Supercontig_12.1:2904070:2904139:-	Intron retention	0.29	0.22	0.35	0.28	0.22	0.34	0.01	0.12
Supercontig_12.1:2904365:2904398:-@Supercontig_12.1:2904235:2904296:-	Intron retention	0.08	0.02	0.15	0.08	0.03	0.14	0	0.1
Supercontig_12.1:2904860:2904987:-@Supercontig_12.1:2904595:2904742:-	Intron retention	0.95	0.93	0.97	0.93	0.9	0.95	0.02	0.12
Supercontig_12.1:2904998:2905374:-@Supercontig_12.1:2904595:2904742:-	Intron retention	0.27	0.25	0.28	0.26	0.24	0.27	0.01	0.04
Supercontig_12.1:2909606:2910190:+@Supercontig_12.1:2910255:2910470:+	Intron retention	0.3	0.06	0.72	0.65	0.38	0.92	-0.35	1.49
Supercontig_12.1:2920358:2920495:-@Supercontig_12.1:2919734:2920181:-	Intron retention	0.28	0.22	0.35	0.06	0.03	0.09	0.22	1000000000000
Supercontig_12.1:2933101:2933631:+@Supercontig_12.1:2933698:2935552:+	Intron retention	0.01	0	0.03	0.01	0	0.02	0	0
Supercontig_12.1:2944287:2944467:-@Supercontig_12.1:2942854:2944219:-	Intron retention	0.01	0	0.02	0.01	0	0.02	0	0
Supercontig_12.1:2986801:2988280:-@Supercontig_12.1:2986087:2986740:-	Intron retention	0	0	0.01	0	0	0.01	0	0
Supercontig_12.1:2988378:2988883:-@Supercontig_12.1:2986801:2988280:-	Intron retention	0	0	0	0	0	0	0	0
Supercontig_12.1:2996279:2997334:+@Supercontig_12.1:2997426:2998339:+	Intron retention	0.04	0.02	0.07	0.01	0	0.02	0.03	0.23
Supercontig_12.1:3002366:3002757:-@Supercontig_12.1:3000744:3002037:-	Intron retention	0.43	0.37	0.49	0.46	0.4	0.51	-0.03	0.13
Supercontig_12.1:3004030:3004540:-@Supercontig_12.1:3002984:3003785:-	Intron retention	0.64	0.6	0.68	0.74	0.71	0.77	-0.1	39.18
Supercontig_12.1:3013734:3014050:-@Supercontig_12.1:3010082:3013562:-	Intron retention	0.04	0.03	0.06	0.03	0.02	0.04	0.01	0.15
Supercontig_12.1:3022412:3022520:-@Supercontig_12.1:3021493:3022347:-	Intron retention	0.01	0.01	0.01	0.01	0.01	0.01	0	0
Supercontig_12.1:3022582:3023069:-@Supercontig_12.1:3021616:3022520:-	Intron retention	0.01	0.01	0.01	0	0	0.01	0.01	0
Supercontig_12.1:3022582:3023069:-@Supercontig_12.1:3022412:3022520:-	Intron retention	0.01	0.01	0.01	0	0	0.01	0.01	0
Supercontig_12.1:3023129:3023445:-@Supercontig_12.1:3022582:3023069:-	Intron retention	0.01	0.01	0.01	0.01	0.01	0.01	0	0
Supercontig_12.1:3023514:3023540:-@Supercontig_12.1:3023129:3023445:-	Intron retention	0.08	0.07	0.09	0.08	0.07	0.09	0	0
Supercontig_12.1:3023817:3024070:-@Supercontig_12.1:3023698:3023711:-	Intron retention	0.04	0.02	0.08	0.01	0	0.02	0.03	0.67
Supercontig_12.1:3024472:3024617:+@Supercontig_12.1:3024680:3025255:+	Intron retention	0.03	0.02	0.05	0	0	0.01	0.03	14.89
Supercontig_12.1:3025590:3026175:+@Supercontig_12.1:3026273:3027825:+	Intron retention	0.05	0.02	0.09	0.18	0.12	0.26	-0.13	43.21
Supercontig_12.1:3043982:3044777:+@Supercontig_12.1:3044847:3047360:+	Intron retention	0.01	0	0.02	0.02	0.01	0.03	-0.01	0.05
Supercontig_12.1:3044336:3044777:+@Supercontig_12.1:3044847:3045896:+	Intron retention	0.01	0	0.02	0.02	0.01	0.03	-0.01	0.05
Supercontig_12.1:3044847:3045896:+@Supercontig_12.1:3046623:3047360:+	Intron retention	0.82	0.8	0.85	0.75	0.72	0.78	0.07	31.94
Supercontig_12.1:3044847:3047360:+@Supercontig_12.1:3047450:3047942:+	Intron retention	0.05	0.03	0.07	0.02	0.01	0.03	0.03	1.05
Supercontig_12.1:3046623:3047360:+@Supercontig_12.1:3047450:3047927:+	Intron retention	0.06	0.03	0.09	0.02	0.01	0.04	0.04	0.68
Supercontig_12.1:3071839:3072061:-@Supercontig_12.1:3070425:3071779:-	Intron retention	0.78	0.4	0.98	0.46	0.22	0.7	0.32	1.77
Supercontig_12.1:3093905:3094119:-@Supercontig_12.1:3093747:3093823:-	Intron retention	0.25	0.19	0.33	0.34	0.28	0.4	-0.09	0.45
Supercontig_12.1:3094237:3094485:-@Supercontig_12.1:3093747:3093823:-	Intron retention	0.18	0.16	0.2	0.1	0.1	0.11	0.08	1000000000000
Supercontig_12.1:3097946:3098503:-@Supercontig_12.1:3096765:3097719:-	Intron retention	0.04	0.03	0.06	0.06	0.04	0.07	-0.02	0.06
Supercontig_12.1:3099747:3099830:-@Supercontig_12.1:3098833:3099675:-	Intron retention	0.08	0.06	0.1	0.04	0.02	0.06	0.04	7.22
Supercontig_12.1:3099979:3100365:-@Supercontig_12.1:3099747:3099830:-	Intron retention	0.01	0.01	0.02	0.02	0.02	0.04	-0.01	0.23
Supercontig_12.1:3100902:3101723:+@Supercontig_12.1:3101792:3101872:+	Intron retention	0.06	0.04	0.09	0.06	0.03	0.08	0	0.05
Supercontig_12.1:3101792:3101872:+@Supercontig_12.1:3101951:3102120:+	Intron retention	0.07	0.04	0.11	0.12	0.08	0.17	-0.05	0.23
Supercontig_12.1:3106986:3107315:-@Supercontig_12.1:3106759:3106861:-	Intron retention	0.71	0.28	0.97	0.79	0.52	0.99	-0.08	0.56
Supercontig_12.1:311541:312376:+@Supercontig_12.1:312429:312492:+	Intron retention	0.1	0.03	0.21	0.03	0	0.1	0.07	0.36
Supercontig_12.1:3124238:3124887:-@Supercontig_12.1:3123978:3124057:-	Intron retention	0.35	0.29	0.41	0.3	0.24	0.36	0.05	0.21
Supercontig_12.1:3127057:3129123:-@Supercontig_12.1:3125823:3126987:-	Intron retention	0.16	0.11	0.22	0.13	0.09	0.17	0.03	0.13
Supercontig_12.1:3133197:3133738:+@Supercontig_12.1:3133957:3135328:+	Intron retention	0.01	0.01	0.01	0.03	0.02	0.03	-0.02	1000000000000
Supercontig_12.1:3136518:3136764:+@Supercontig_12.1:3136867:3140929:+	Intron retention	0.06	0.03	0.1	0.04	0.02	0.07	0.02	0.08
Supercontig_12.1:3136867:3140929:+@Supercontig_12.1:3141001:3142158:+	Intron retention	0.01	0	0.02	0.04	0.02	0.06	-0.03	3.3
Supercontig_12.1:3147842:3148351:-@Supercontig_12.1:3145619:3147546:-	Intron retention	0.02	0.01	0.03	0.01	0.01	0.02	0.01	0
Supercontig_12.1:3148413:3148918:-@Supercontig_12.1:3147842:3148351:-	Intron retention	0.03	0.02	0.04	0.02	0.01	0.03	0.01	0
Supercontig_12.1:3168154:3168754:-@Supercontig_12.1:3165732:3168068:-	Intron retention	0.14	0.09	0.2	0.09	0.06	0.13	0.05	0.31
Supercontig_12.1:3169216:3169629:-@Supercontig_12.1:3168154:3168754:-	Intron retention	0.22	0.16	0.28	0.07	0.03	0.12	0.15	40.23
Supercontig_12.1:3171276:3174334:+@Supercontig_12.1:3174400:3175788:+	Intron retention	0.02	0.01	0.04	0.01	0.01	0.02	0.01	0.05
Supercontig_12.1:3177740:3178169:+@Supercontig_12.1:3178309:3179154:+	Intron retention	0.31	0.21	0.43	0.34	0.21	0.47	-0.03	0.25
Supercontig_12.1:3180075:3180186:-@Supercontig_12.1:3179425:3179932:-	Intron retention	0.23	0.19	0.27	0.21	0.18	0.24	0.02	0.09
Supercontig_12.1:3180075:3180186:-@Supercontig_12.1:3179425:3180004:-	Intron retention	0.31	0.22	0.41	0.38	0.3	0.48	-0.07	0.31
Supercontig_12.1:3183053:3183354:+@Supercontig_12.1:3183428:3184014:+	Intron retention	0.02	0.01	0.04	0.04	0.02	0.05	-0.02	0.06
Supercontig_12.1:3188788:3189144:-@Supercontig_12.1:3188402:3188686:-	Intron retention	0.22	0.13	0.35	0.18	0.1	0.29	0.04	0.21
Supercontig_12.1:3205238:3205316:-@Supercontig_12.1:3203981:3205153:-	Intron retention	0.08	0.03	0.15	0.08	0.05	0.14	0	0.09
Supercontig_12.1:3207376:3207470:+@Supercontig_12.1:3207528:3207646:+	Intron retention	0.11	0.05	0.18	0.1	0.05	0.16	0.01	0.12
Supercontig_12.1:3207704:3207715:+@Supercontig_12.1:3207779:3207947:+	Intron retention	0.22	0.1	0.39	0.56	0.39	0.79	-0.34	10.48
Supercontig_12.1:3216834:3217251:-@Supercontig_12.1:3215935:3216740:-	Intron retention	0.18	0.1	0.27	0.08	0.04	0.13	0.1	1.52
Supercontig_12.1:3217321:3217406:-@Supercontig_12.1:3216834:3217251:-	Intron retention	0.12	0.05	0.2	0.46	0.32	0.61	-0.34	1.31458e+06
Supercontig_12.1:3217471:3217860:-@Supercontig_12.1:3217321:3217406:-	Intron retention	0.39	0.23	0.59	0.6	0.33	0.86	-0.21	0.99
Supercontig_12.1:3217971:3218947:-@Supercontig_12.1:3217471:3217860:-	Intron retention	0.18	0.11	0.26	0.09	0.05	0.16	0.09	0.57
Supercontig_12.1:3230230:3230535:-@Supercontig_12.1:3227560:3230097:-	Intron retention	0.04	0.03	0.06	0.04	0.03	0.06	0	0.03
Supercontig_12.1:3230655:3231661:-@Supercontig_12.1:3230230:3230535:-	Intron retention	0.02	0.01	0.03	0.01	0.01	0.02	0.01	0.05
Supercontig_12.1:3237110:3238200:-@Supercontig_12.1:3236463:3236850:-	Intron retention	0.12	0.07	0.18	0.07	0.04	0.11	0.05	0.23
Supercontig_12.1:3237110:3238407:-@Supercontig_12.1:3236463:3236850:-	Intron retention	0.13	0.08	0.2	0.08	0.04	0.12	0.05	0.26
Supercontig_12.1:3238258:3238407:-@Supercontig_12.1:3237110:3238200:-	Intron retention	0.63	0.38	0.92	0.56	0.37	0.78	0.07	0.49
Supercontig_12.1:3262809:3263326:+@Supercontig_12.1:3263405:3264500:+	Intron retention	0.02	0	0.04	0.03	0.01	0.05	-0.01	0.06
Supercontig_12.1:3266969:3267304:-@Supercontig_12.1:3265972:3266908:-	Intron retention	0.01	0.01	0.01	0.01	0.01	0.01	0	0
Supercontig_12.1:3267569:3267804:-@Supercontig_12.1:3266969:3267304:-	Intron retention	0.01	0.01	0.01	0.01	0.01	0.01	0	0
Supercontig_12.1:3268235:3268374:+@Supercontig_12.1:3268503:3268728:+	Intron retention	0.06	0.05	0.06	0	0	0	0.06	1000000000000
Supercontig_12.1:3271214:3272363:+@Supercontig_12.1:3272415:3272893:+	Intron retention	0	0	0.01	0.01	0	0.01	-0.01	0
Supercontig_12.1:3281886:3283122:+@Supercontig_12.1:3283231:3284141:+	Intron retention	0.02	0.01	0.03	0.03	0.02	0.04	-0.01	0
Supercontig_12.1:3300373:3300889:-@Supercontig_12.1:3298324:3300270:-	Intron retention	0.21	0.15	0.27	0.19	0.15	0.24	0.02	0.11
Supercontig_12.1:3305614:3307379:-@Supercontig_12.1:3303926:3304649:-	Intron retention	0.14	0.13	0.16	0.14	0.13	0.16	0	0
Supercontig_12.1:3305614:3307569:-@Supercontig_12.1:3303711:3304649:-	Intron retention	0.15	0.14	0.17	0.15	0.14	0.17	0	0
Supercontig_12.1:3307474:3307569:-@Supercontig_12.1:3304628:3307379:-	Intron retention	0.13	0.08	0.18	0.14	0.09	0.2	-0.01	0.1
Supercontig_12.1:3307474:3307569:-@Supercontig_12.1:3305614:3307379:-	Intron retention	0.09	0.06	0.13	0.1	0.06	0.15	-0.01	0.08
Supercontig_12.1:3307626:3307686:-@Supercontig_12.1:3307474:3307569:-	Intron retention	0.3	0.14	0.52	0.84	0.58	0.97	-0.54	64.84
Supercontig_12.1:3307626:3308305:-@Supercontig_12.1:3305614:3307569:-	Intron retention	0.04	0.02	0.09	0.04	0.01	0.09	0	0.06
Supercontig_12.1:3310078:3310608:-@Supercontig_12.1:3309672:3309870:-	Intron retention	0.06	0.04	0.09	0.09	0.06	0.12	-0.03	0.14
Supercontig_12.1:3321186:3322402:+@Supercontig_12.1:3322458:3322711:+	Intron retention	0.05	0	0.17	0.11	0.03	0.26	-0.06	0.25
Supercontig_12.1:3324261:3324411:-@Supercontig_12.1:3323046:3324201:-	Intron retention	0.01	0	0.02	0.01	0	0.02	0	0
Supercontig_12.1:3324753:3324873:-@Supercontig_12.1:3324261:3324411:-	Intron retention	0.07	0.05	0.09	0.09	0.07	0.11	-0.02	0.07
Supercontig_12.1:3325804:3326294:-@Supercontig_12.1:3325141:3325702:-	Intron retention	0.37	0.31	0.42	0.31	0.27	0.36	0.06	0.25
Supercontig_12.1:3338154:3339263:+@Supercontig_12.1:3339341:3341886:+	Intron retention	0.02	0	0.04	0.01	0	0.02	0.01	0.03
Supercontig_12.1:3354968:3355404:+@Supercontig_12.1:3355508:3356087:+	Intron retention	0.05	0.01	0.1	0.04	0.01	0.1	0.01	0.07
Supercontig_12.1:3358110:3359231:+@Supercontig_12.1:3359343:3360889:+	Intron retention	0.06	0.04	0.1	0.1	0.07	0.14	-0.04	0.2
Supercontig_12.1:3361968:3362013:-@Supercontig_12.1:3361502:3361785:-	Intron retention	0.05	0.03	0.07	0.05	0.03	0.07	0	0.04
Supercontig_12.1:3362215:3362459:-@Supercontig_12.1:3361502:3362013:-	Intron retention	0.02	0.01	0.03	0.04	0.02	0.05	-0.02	0.13
Supercontig_12.1:3362215:3362466:-@Supercontig_12.1:3361968:3362013:-	Intron retention	0.01	0	0.02	0.03	0.01	0.04	-0.02	0.16
Supercontig_12.1:3371158:3371264:+@Supercontig_12.1:3371321:3371631:+	Intron retention	0	0	0.01	0	0	0.01	0	0
Supercontig_12.1:3373724:3374037:-@Supercontig_12.1:3373613:3373644:-	Intron retention	0.23	0.15	0.34	0.09	0.05	0.14	0.14	10.61
Supercontig_12.1:3374920:3375110:+@Supercontig_12.1:3375454:3375480:+	Intron retention	0.94	0.92	0.96	0.95	0.93	0.96	-0.01	0.04
Supercontig_12.1:3375645:3375666:+@Supercontig_12.1:3375753:3376161:+	Intron retention	0.2	0.17	0.23	0.2	0.17	0.23	0	0.06
Supercontig_12.1:3381952:3382732:+@Supercontig_12.1:3382883:3383212:+	Intron retention	0.08	0.04	0.13	0.08	0.03	0.15	0	0.09
Supercontig_12.1:3397417:3397558:-@Supercontig_12.1:3396655:3397305:-	Intron retention	0.03	0.02	0.05	0.03	0.01	0.04	0	0.03
Supercontig_12.1:3398609:3398737:-@Supercontig_12.1:3397640:3398492:-	Intron retention	0.08	0.06	0.1	0.07	0.05	0.09	0.01	0.04
Supercontig_12.1:3399392:3399590:+@Supercontig_12.1:3399886:3400189:+	Intron retention	0.01	0.01	0.01	0.01	0.01	0.01	0	0
Supercontig_12.1:3399886:3400189:+@Supercontig_12.1:3400289:3400466:+	Intron retention	0	0	0.01	0	0	0.01	0	0
Supercontig_12.1:3400289:3400466:+@Supercontig_12.1:3400559:3401441:+	Intron retention	0.01	0.01	0.01	0.01	0.01	0.01	0	0
Supercontig_12.1:340059:340213:+@Supercontig_12.1:340349:342693:+	Intron retention	0.02	0.01	0.05	0.01	0.01	0.03	0.01	0.03
Supercontig_12.1:3403828:3404150:-@Supercontig_12.1:3402298:3403746:-	Intron retention	0.71	0.67	0.75	0.82	0.77	0.86	-0.11	8.55
Supercontig_12.1:3403968:3404406:-@Supercontig_12.1:3402298:3403746:-	Intron retention	0.72	0.66	0.77	0.59	0.54	0.64	0.13	10.93
Supercontig_12.1:3405419:3406082:+@Supercontig_12.1:3406287:3406821:+	Intron retention	0.06	0.05	0.08	0.05	0.04	0.06	0.01	0.2
Supercontig_12.1:3407982:3408115:+@Supercontig_12.1:3408326:3408356:+	Intron retention	0.04	0.02	0.06	0.01	0	0.02	0.03	0.93
Supercontig_12.1:3408805:3408874:+@Supercontig_12.1:3409083:3409485:+	Intron retention	0.06	0.04	0.07	0.05	0.03	0.07	0.01	0.05
Supercontig_12.1:3411545:3413969:-@Supercontig_12.1:3409476:3411481:-	Intron retention	0.04	0.01	0.08	0.04	0.01	0.09	0	0.07
Supercontig_12.1:3416098:3416216:-@Supercontig_12.1:3415056:3416015:-	Intron retention	0.02	0.01	0.05	0.02	0.01	0.04	0	0.03
Supercontig_12.1:3416098:3416216:-@Supercontig_12.1:3415093:3416015:-	Intron retention	0.02	0	0.05	0.02	0.01	0.04	0	0.03
Supercontig_12.1:3417034:3417145:-@Supercontig_12.1:3416313:3416969:-	Intron retention	0.94	0.88	0.99	0.87	0.78	0.94	0.07	0.35
Supercontig_12.1:3439336:3439578:-@Supercontig_12.1:3437605:3439263:-	Intron retention	0.02	0	0.06	0.03	0.01	0.09	-0.01	0.08
Supercontig_12.1:3440907:3441946:-@Supercontig_12.1:3440752:3440829:-	Intron retention	0.59	0.41	0.78	0.37	0.07	0.69	0.22	0.78
Supercontig_12.1:3440907:3442036:-@Supercontig_12.1:3440752:3440829:-	Intron retention	0.63	0.42	0.81	0.36	0.11	0.64	0.27	1.24
Supercontig_12.1:3443997:3444372:-@Supercontig_12.1:3443898:3443942:-	Intron retention	0.18	0.07	0.36	0.16	0.07	0.28	0.02	0.24
Supercontig_12.1:3444831:3445401:-@Supercontig_12.1:3444427:3444739:-	Intron retention	0.07	0.03	0.11	0.05	0.02	0.09	0.02	0.08
Supercontig_12.1:3445548:3446195:+@Supercontig_12.1:3446262:3448439:+	Intron retention	0.07	0.03	0.12	0.05	0.02	0.08	0.02	0.09
Supercontig_12.1:3446262:3448439:+@Supercontig_12.1:3448498:3449548:+	Intron retention	0.02	0	0.04	0.04	0.02	0.07	-0.02	0.11
Supercontig_12.1:3453235:3453677:-@Supercontig_12.1:3451939:3453150:-	Intron retention	0.02	0	0.04	0.06	0.04	0.08	-0.04	1.78
Supercontig_12.1:3456455:3456528:-@Supercontig_12.1:3455917:3456390:-	Intron retention	0.02	0.01	0.04	0.02	0.01	0.03	0	0
Supercontig_12.1:3456591:3457947:-@Supercontig_12.1:3456455:3456528:-	Intron retention	0.01	0	0.02	0.01	0	0.02	0	0
Supercontig_12.1:3467434:3467875:-@Supercontig_12.1:3465987:3467377:-	Intron retention	0.37	0.27	0.48	0.38	0.28	0.5	-0.01	0.21
Supercontig_12.1:350863:352922:-@Supercontig_12.1:350032:350778:-	Intron retention	0.19	0.11	0.3	0.03	0.01	0.1	0.16	4.77
Supercontig_12.1:350926:351635:-@Supercontig_12.1:350032:350778:-	Intron retention	0.28	0.2	0.38	0.13	0.09	0.19	0.15	5.72
Supercontig_12.1:350926:352922:-@Supercontig_12.1:350032:350778:-	Intron retention	0.35	0.25	0.46	0.16	0.1	0.22	0.19	26.92
Supercontig_12.1:3515557:3515832:-@Supercontig_12.1:3513381:3515485:-	Intron retention	0.04	0.02	0.05	0.02	0.01	0.03	0.02	0.11
Supercontig_12.1:352091:352922:-@Supercontig_12.1:350926:351635:-	Intron retention	0.48	0.39	0.57	0.47	0.4	0.55	0.01	0.16
Supercontig_12.1:3521464:3522296:-@Supercontig_12.1:3520866:3521393:-	Intron retention	0.04	0.02	0.07	0.03	0.02	0.06	0.01	0.04
Supercontig_12.1:3523879:3524258:-@Supercontig_12.1:3523672:3523824:-	Intron retention	0.94	0.92	0.96	0.91	0.89	0.93	0.03	0.39
Supercontig_12.1:3525616:3525856:-@Supercontig_12.1:3525329:3525369:-	Intron retention	0.04	0.03	0.07	0.04	0.02	0.06	0	0.04
Supercontig_12.1:3525616:3526584:-@Supercontig_12.1:3525329:3525369:-	Intron retention	0.03	0.02	0.05	0.03	0.02	0.04	0	0.03
Supercontig_12.1:3526025:3526072:-@Supercontig_12.1:3525616:3525856:-	Intron retention	0.88	0.84	0.91	0.84	0.81	0.87	0.04	0.17
Supercontig_12.1:3530085:3530673:+@Supercontig_12.1:3530736:3531031:+	Intron retention	0.01	0	0.02	0.01	0	0.02	0	0
Supercontig_12.1:3548507:3548995:-@Supercontig_12.1:3545195:3548322:-	Intron retention	0.04	0.02	0.06	0.04	0.03	0.06	0	0.04
Supercontig_12.1:3548507:3549019:-@Supercontig_12.1:3545195:3548322:-	Intron retention	0.04	0.02	0.06	0.04	0.03	0.06	0	0.04
Supercontig_12.1:3549512:3550304:-@Supercontig_12.1:3548507:3548995:-	Intron retention	0.23	0.19	0.28	0.27	0.23	0.32	-0.04	0.17
Supercontig_12.1:3549512:3550304:-@Supercontig_12.1:3548507:3549019:-	Intron retention	0.12	0.09	0.15	0.14	0.12	0.17	-0.02	0.11
Supercontig_12.1:356403:356854:+@Supercontig_12.1:356923:357891:+	Intron retention	0.14	0.08	0.21	0.1	0.06	0.15	0.04	0.15
Supercontig_12.1:3566080:3566252:+@Supercontig_12.1:3566353:3567054:+	Intron retention	0.27	0.1	0.47	0.28	0.1	0.55	-0.01	0.45
Supercontig_12.1:3568438:3568579:+@Supercontig_12.1:3568661:3569412:+	Intron retention	0.58	0.32	0.93	0.4	0.29	0.51	0.18	0.78
Supercontig_12.1:3589039:3589129:-@Supercontig_12.1:3588801:3588941:-	Intron retention	0.06	0.03	0.09	0.06	0.04	0.08	0	0.05
Supercontig_12.1:3589866:3590379:+@Supercontig_12.1:3590472:3591557:+	Intron retention	0.17	0.04	0.4	0.04	0	0.12	0.13	0.64
Supercontig_12.1:3638094:3638509:+@Supercontig_12.1:3638855:3640580:+	Intron retention	0.8	0.72	0.87	0.41	0.33	0.5	0.39	1000000000000
Supercontig_12.1:3664350:3664776:+@Supercontig_12.1:3664836:3665083:+	Intron retention	0.03	0.02	0.06	0.03	0.02	0.05	0	0.03
Supercontig_12.1:3664836:3665083:+@Supercontig_12.1:3665188:3668616:+	Intron retention	0.02	0.01	0.03	0.02	0.01	0.02	0	0
Supercontig_12.1:3670427:3670538:-@Supercontig_12.1:3665778:3670361:-	Intron retention	0.23	0.15	0.33	0.24	0.18	0.31	-0.01	0.14
Supercontig_12.1:3671286:3671901:+@Supercontig_12.1:3671968:3672133:+	Intron retention	0.11	0.04	0.2	0.17	0.1	0.26	-0.06	0.29
Supercontig_12.1:3671968:3672133:+@Supercontig_12.1:3672203:3672825:+	Intron retention	0.06	0.01	0.13	0.09	0.03	0.19	-0.03	0.16
Supercontig_12.1:367407:367463:-@Supercontig_12.1:367224:367343:-	Intron retention	0.52	0.4	0.64	0.49	0.4	0.59	0.03	0.22
Supercontig_12.1:3674708:3674910:+@Supercontig_12.1:3675642:3675715:+	Intron retention	0.45	0.43	0.48	0.65	0.62	0.67	-0.2	1000000000000
Supercontig_12.1:3674855:3674910:+@Supercontig_12.1:3675302:3675715:+	Intron retention	0.37	0.34	0.39	0.19	0.18	0.2	0.18	1000000000000
Supercontig_12.1:3675302:3675352:-@Supercontig_12.1:3674708:3674910:-	Intron retention	0.24	0.22	0.26	0.15	0.14	0.16	0.09	1000000000000
Supercontig_12.1:3675302:3675715:+@Supercontig_12.1:3675948:3676165:+	Intron retention	0.01	0.01	0.01	0.02	0.01	0.02	-0.01	0
Supercontig_12.1:3675642:3675715:-@Supercontig_12.1:3675302:3675352:-	Intron retention	0.39	0.36	0.43	0.23	0.2	0.25	0.16	1000000000000
Supercontig_12.1:3675948:3676165:-@Supercontig_12.1:3675642:3675715:-	Intron retention	0.01	0	0.01	0.01	0.01	0.01	0	0
Supercontig_12.1:3675948:3676165:+@Supercontig_12.1:3676228:3676826:+	Intron retention	0.04	0.03	0.05	0.05	0.04	0.06	-0.01	0.04
Supercontig_12.1:3676301:3676902:-@Supercontig_12.1:3675948:3676165:-	Intron retention	0.13	0.13	0.15	0.1	0.09	0.11	0.03	1000000000000
Supercontig_12.1:3678314:3678390:+@Supercontig_12.1:3678455:3678528:+	Intron retention	0.08	0.04	0.12	0.09	0.03	0.15	-0.01	0.1
Supercontig_12.1:3678455:3678528:+@Supercontig_12.1:3678586:3678656:+	Intron retention	0.29	0.2	0.39	0.22	0.16	0.29	0.07	0.28
Supercontig_12.1:3678455:3678656:-@Supercontig_12.1:3678314:3678390:-	Intron retention	0.1	0.06	0.16	0.11	0.06	0.18	-0.01	0.12
Supercontig_12.1:3678719:3678793:+@Supercontig_12.1:3678923:3679149:+	Intron retention	0.1	0.05	0.16	0.07	0.03	0.13	0.03	0.11
Supercontig_12.1:3678923:3679149:+@Supercontig_12.1:3679216:3679327:+	Intron retention	0.04	0.01	0.09	0.01	0	0.03	0.03	0.12
Supercontig_12.1:3679216:3679327:+@Supercontig_12.1:3679387:3679514:+	Intron retention	0.04	0.01	0.09	0.07	0.03	0.12	-0.03	0.12
Supercontig_12.1:3679571:3679732:+@Supercontig_12.1:3679816:3680137:+	Intron retention	0.05	0.03	0.08	0.03	0.01	0.05	0.02	0.09
Supercontig_12.1:3679816:3680033:-@Supercontig_12.1:3679571:3679732:-	Intron retention	0.05	0.02	0.07	0.03	0.01	0.05	0.02	0.08
Supercontig_12.1:368005:368193:+@Supercontig_12.1:368254:368975:+	Intron retention	0.02	0.01	0.03	0.02	0.01	0.03	0	0
Supercontig_12.1:3708802:3709149:+@Supercontig_12.1:3709310:3709407:+	Intron retention	0.01	0	0.01	0	0	0.01	0.01	0
Supercontig_12.1:3709505:3709708:+@Supercontig_12.1:3709767:3710783:+	Intron retention	0.03	0.02	0.03	0.02	0.02	0.03	0.01	0
Supercontig_12.1:3709767:3710783:+@Supercontig_12.1:3710854:3711805:+	Intron retention	0.01	0	0.01	0.04	0.03	0.05	-0.03	1000000000000
Supercontig_12.1:3730153:3730764:+@Supercontig_12.1:3730834:3731153:+	Intron retention	0.07	0.05	0.09	0.04	0.03	0.05	0.03	0.58
Supercontig_12.1:388346:388761:-@Supercontig_12.1:386939:387865:-	Intron retention	0.04	0.04	0.05	0.06	0.05	0.07	-0.02	0.28
Supercontig_12.1:3974420:3974681:-@Supercontig_12.1:3974278:3974360:-	Intron retention	0.07	0.04	0.11	0.07	0.04	0.1	0	0.06
Supercontig_12.1:3987756:3989432:+@Supercontig_12.1:3989495:3990628:+	Intron retention	0.03	0.01	0.05	0.01	0.01	0.02	0.02	0.07
Supercontig_12.1:3990835:3991131:+@Supercontig_12.1:3991201:3991493:+	Intron retention	0.12	0.09	0.17	0.18	0.14	0.23	-0.06	0.37
Supercontig_12.1:3991201:3991493:+@Supercontig_12.1:3991592:3992328:+	Intron retention	0.13	0.11	0.16	0.07	0.05	0.09	0.06	430.69
Supercontig_12.1:3991592:3992328:+@Supercontig_12.1:3992390:3992764:+	Intron retention	0.06	0.04	0.08	0.09	0.07	0.12	-0.03	0.47
Supercontig_12.1:3992898:3993100:+@Supercontig_12.1:3993212:3993464:+	Intron retention	0.02	0.01	0.02	0.03	0.02	0.04	-0.01	0.13
Supercontig_12.1:3993212:3993464:+@Supercontig_12.1:3993552:3994238:+	Intron retention	0.01	0	0.01	0.01	0	0.01	0	0
Supercontig_12.1:3994463:3994955:-@Supercontig_12.1:3993967:3994408:-	Intron retention	0	0	0.01	0.05	0.04	0.07	-0.05	1000000000000
Supercontig_12.1:3995017:3995203:-@Supercontig_12.1:3994463:3994955:-	Intron retention	0.01	0	0.01	0	0	0	0.01	0
Supercontig_12.1:4004263:4004444:-@Supercontig_12.1:4001466:4004194:-	Intron retention	0.6	0.5	0.71	0.47	0.38	0.56	0.13	0.95
Supercontig_12.1:4009245:4009650:-@Supercontig_12.1:4007554:4009168:-	Intron retention	0	0	0.01	0.01	0	0.02	-0.01	0
Supercontig_12.1:4040620:4042716:-@Supercontig_12.1:4040261:4040544:-	Intron retention	0.02	0.01	0.03	0.01	0.01	0.03	0.01	0
Supercontig_12.1:4042791:4043224:-@Supercontig_12.1:4040620:4042716:-	Intron retention	0.02	0.01	0.04	0.01	0	0.02	0.01	0.05
Supercontig_12.1:4096508:4096940:-@Supercontig_12.1:4095695:4096414:-	Intron retention	0.01	0.01	0.01	0.01	0	0.01	0	0
Supercontig_12.1:4098808:4099799:+@Supercontig_12.1:4099856:4100551:+	Intron retention	0	0	0.01	0.02	0.01	0.03	-0.02	0.3
Supercontig_12.1:4106029:4106118:+@Supercontig_12.1:4106175:4106233:+	Intron retention	0.24	0.04	0.61	0.35	0.03	0.74	-0.11	0.66
Supercontig_12.1:4107436:4107966:+@Supercontig_12.1:4108064:4108145:+	Intron retention	0.07	0	0.18	0.6	0.36	0.82	-0.53	713.58
Supercontig_12.1:4120220:4121351:-@Supercontig_12.1:4119705:4120091:-	Intron retention	0.03	0.02	0.05	0.02	0.01	0.04	0.01	0.04
Supercontig_12.1:4121814:4122188:+@Supercontig_12.1:4122259:4122293:+	Intron retention	0.98	0.94	1	0.55	0.45	0.64	0.43	1000000000000
Supercontig_12.1:4122259:4122293:+@Supercontig_12.1:4122358:4122472:+	Intron retention	0.53	0.42	0.65	0.39	0.28	0.51	0.14	0.79
Supercontig_12.1:4122358:4122472:+@Supercontig_12.1:4122538:4122875:+	Intron retention	0.09	0.06	0.12	0.16	0.13	0.19	-0.07	4.82
Supercontig_12.1:4123689:4123802:+@Supercontig_12.1:4123895:4124038:+	Intron retention	0.28	0.24	0.32	0.22	0.18	0.27	0.06	0.55
Supercontig_12.1:4123895:4124038:+@Supercontig_12.1:4124107:4124197:+	Intron retention	0.25	0.2	0.3	0.17	0.13	0.22	0.08	1.07
Supercontig_12.1:4124463:4124679:+@Supercontig_12.1:4124757:4126293:+	Intron retention	0.04	0.03	0.06	0.04	0.02	0.07	0	0.04
Supercontig_12.1:4126553:4126659:-@Supercontig_12.1:4126097:4126476:-	Intron retention	0.05	0.01	0.12	0.08	0.03	0.16	-0.03	0.17
Supercontig_12.1:4127939:4128038:-@Supercontig_12.1:4127765:4127849:-	Intron retention	0.94	0.78	1	0.62	0.42	0.78	0.32	6.26
Supercontig_12.1:4135754:4136030:-@Supercontig_12.1:4135019:4135621:-	Intron retention	0.02	0.01	0.03	0.02	0.01	0.03	0	0
Supercontig_12.1:4135754:4136112:-@Supercontig_12.1:4135019:4135621:-	Intron retention	0.02	0.01	0.03	0.02	0.01	0.03	0	0
Supercontig_12.1:4135754:4136377:-@Supercontig_12.1:4135057:4135621:-	Intron retention	0.02	0.01	0.03	0.02	0.01	0.03	0	0
Supercontig_12.1:4136249:4136435:-@Supercontig_12.1:4135754:4136030:-	Intron retention	0.49	0.46	0.52	0.61	0.59	0.64	-0.12	5.61205e+09
Supercontig_12.1:4136249:4136435:-@Supercontig_12.1:4135754:4136112:-	Intron retention	0.25	0.22	0.28	0.19	0.16	0.21	0.06	5.41
Supercontig_12.1:4137114:4137206:+@Supercontig_12.1:4137302:4137349:+	Intron retention	0.08	0.01	0.29	0.45	0.2	0.71	-0.37	5.72
Supercontig_12.1:4137430:4137442:+@Supercontig_12.1:4137513:4137994:+	Intron retention	0.08	0	0.32	0.22	0.09	0.42	-0.14	0.75
Supercontig_12.1:4138151:4138521:+@Supercontig_12.1:4138597:4138660:+	Intron retention	0.06	0.02	0.12	0.01	0	0.03	0.05	1.21
Supercontig_12.1:4138597:4138660:+@Supercontig_12.1:4138728:4140749:+	Intron retention	0.1	0.05	0.17	0.12	0.07	0.17	-0.02	0.11
Supercontig_12.1:4143347:4145218:-@Supercontig_12.1:4142926:4143262:-	Intron retention	0.59	0.4	0.79	0.17	0.05	0.35	0.42	58.88
Supercontig_12.1:4146856:4147010:-@Supercontig_12.1:4146645:4146707:-	Intron retention	0.02	0.01	0.03	0.01	0.01	0.02	0.01	0.1
Supercontig_12.1:4147254:4147562:-@Supercontig_12.1:4146856:4147010:-	Intron retention	0.03	0.03	0.04	0.03	0.03	0.03	0	0
Supercontig_12.1:4148623:4149525:-@Supercontig_12.1:4148071:4148538:-	Intron retention	0.03	0.02	0.04	0.02	0.01	0.02	0.01	0.19
Supercontig_12.1:4149614:4149674:-@Supercontig_12.1:4148623:4149525:-	Intron retention	0.01	0.01	0.01	0	0	0	0.01	0
Supercontig_12.1:4149760:4150160:-@Supercontig_12.1:4149614:4149674:-	Intron retention	0.02	0.01	0.03	0.02	0.01	0.03	0	0
Supercontig_12.1:4151573:4151728:-@Supercontig_12.1:4150992:4151476:-	Intron retention	0.19	0.12	0.27	0.16	0.08	0.24	0.03	0.17
Supercontig_12.1:4151808:4152444:-@Supercontig_12.1:4151573:4151728:-	Intron retention	0.07	0.03	0.13	0.16	0.09	0.25	-0.09	0.65
Supercontig_12.1:4156262:4157065:-@Supercontig_12.1:4154926:4156198:-	Intron retention	0.29	0.15	0.49	0.12	0.02	0.28	0.17	1.01
Supercontig_12.1:4162063:4162445:-@Supercontig_12.1:4160217:4161982:-	Intron retention	0.05	0.03	0.06	0.02	0.01	0.03	0.03	11.24
Supercontig_12.1:417352:417860:+@Supercontig_12.1:417936:418262:+	Intron retention	0.05	0.03	0.07	0.02	0.01	0.04	0.03	0.26
Supercontig_12.1:417936:418262:+@Supercontig_12.1:418329:419464:+	Intron retention	0.03	0.02	0.04	0.03	0.02	0.05	0	0
Supercontig_12.1:4197553:4198068:+@Supercontig_12.1:4198303:4199047:+	Intron retention	0.02	0.01	0.03	0.03	0.02	0.04	-0.01	0
Supercontig_12.1:4205450:4205744:-@Supercontig_12.1:4203747:4205385:-	Intron retention	0.01	0	0.02	0.01	0	0.02	0	0
Supercontig_12.1:4205831:4206244:-@Supercontig_12.1:4205450:4205744:-	Intron retention	0.01	0	0.01	0.01	0	0.01	0	0
Supercontig_12.1:4206965:4207187:+@Supercontig_12.1:4207257:4207474:+	Intron retention	0	0	0	0	0	0	0	0
Supercontig_12.1:4207257:4207474:+@Supercontig_12.1:4207539:4208009:+	Intron retention	0.01	0	0.01	0	0	0.01	0.01	0
Supercontig_12.1:4208122:4208472:+@Supercontig_12.1:4208533:4209245:+	Intron retention	0.05	0	0.14	0.16	0.06	0.31	-0.11	0.71
Supercontig_12.1:4232589:4234281:-@Supercontig_12.1:4230174:4232525:-	Intron retention	0.06	0.02	0.1	0.05	0.02	0.09	0.01	0.06
Supercontig_12.1:4237872:4241119:-@Supercontig_12.1:4237057:4237798:-	Intron retention	0.02	0.01	0.04	0.02	0.01	0.03	0	0
Supercontig_12.1:4237872:4241723:-@Supercontig_12.1:4237057:4237798:-	Intron retention	0.02	0.01	0.03	0.02	0.01	0.03	0	0
Supercontig_12.1:4241395:4241723:-@Supercontig_12.1:4237872:4241119:-	Intron retention	0.37	0.3	0.43	0.35	0.29	0.4	0.02	0.12
Supercontig_12.1:4247227:4247602:+@Supercontig_12.1:4247667:4250308:+	Intron retention	0.08	0.02	0.15	0.05	0.02	0.1	0.03	0.11
Supercontig_12.1:4247323:4247610:+@Supercontig_12.1:4247674:4250308:+	Intron retention	0.37	0.24	0.54	0.29	0.18	0.41	0.08	0.35
Supercontig_12.1:4253804:4254115:-@Supercontig_12.1:4253667:4253738:-	Intron retention	0.16	0.08	0.26	0.13	0.06	0.22	0.03	0.18
Supercontig_12.1:4254185:4254210:-@Supercontig_12.1:4253804:4254115:-	Intron retention	0.64	0.47	0.83	0.65	0.51	0.77	-0.01	0.3
Supercontig_12.1:4256099:4256395:+@Supercontig_12.1:4256571:4256674:+	Intron retention	0.17	0.15	0.18	0.2	0.18	0.21	-0.03	0.43
Supercontig_12.1:4256571:4256674:+@Supercontig_12.1:4256789:4256823:+	Intron retention	0.04	0.02	0.06	0.1	0.07	0.13	-0.06	5.53
Supercontig_12.1:4266074:4266600:+@Supercontig_12.1:4266677:4267245:+	Intron retention	0.12	0.07	0.19	0.14	0.09	0.21	-0.02	0.13
Supercontig_12.1:4266677:4267245:+@Supercontig_12.1:4267328:4269233:+	Intron retention	0.06	0.02	0.12	0.05	0.01	0.1	0.01	0.08
Supercontig_12.1:4290353:4290454:+@Supercontig_12.1:4290517:4290594:+	Intron retention	0.03	0.01	0.07	0.04	0.02	0.08	-0.01	0.06
Supercontig_12.1:4290517:4290594:+@Supercontig_12.1:4290657:4291075:+	Intron retention	0.04	0.01	0.07	0.05	0.03	0.08	-0.01	0.06
Supercontig_12.1:4290657:4291075:+@Supercontig_12.1:4291147:4292334:+	Intron retention	0.1	0.07	0.13	0.05	0.03	0.09	0.05	0.39
Supercontig_12.1:4300914:4302214:+@Supercontig_12.1:4302271:4303246:+	Intron retention	0.06	0.02	0.12	0.05	0.02	0.09	0.01	0.08
Supercontig_12.1:4300914:4302214:+@Supercontig_12.1:4302271:4304419:+	Intron retention	0.06	0.02	0.12	0.05	0.02	0.1	0.01	0.07
Supercontig_12.1:4302271:4303246:+@Supercontig_12.1:4303350:4304364:+	Intron retention	0.23	0.17	0.29	0.38	0.31	0.46	-0.15	7.22
Supercontig_12.1:4304632:4305009:+@Supercontig_12.1:4305219:4306335:+	Intron retention	0	0	0.01	0.01	0.01	0.02	-0.01	0
Supercontig_12.1:4334594:4335128:-@Supercontig_12.1:4333774:4334504:-	Intron retention	0.03	0.03	0.04	0.03	0.02	0.03	0	0
Supercontig_12.1:4366252:4366606:-@Supercontig_12.1:4365085:4366166:-	Intron retention	0.06	0.02	0.1	0.07	0.04	0.12	-0.01	0.09
Supercontig_12.1:437279:438196:+@Supercontig_12.1:438483:440326:+	Intron retention	0.07	0.04	0.1	0.04	0.03	0.06	0.03	0.14
Supercontig_12.1:438225:438418:+@Supercontig_12.1:438483:440326:+	Intron retention	0.02	0	0.04	0.02	0.01	0.04	0	0.03
Supercontig_12.1:438483:440326:+@Supercontig_12.1:440381:440533:+	Intron retention	0.01	0	0.02	0	0	0.01	0.01	0
Supercontig_12.1:4387422:4387761:+@Supercontig_12.1:4387814:4387975:+	Intron retention	0.02	0.01	0.03	0	0	0.01	0.02	0.33
Supercontig_12.1:4388952:4389262:+@Supercontig_12.1:4389340:4390068:+	Intron retention	0	0	0.01	0.01	0	0.01	-0.01	0
Supercontig_12.1:4393433:4393549:-@Supercontig_12.1:4391589:4393376:-	Intron retention	0.04	0.01	0.07	0.05	0.02	0.08	-0.01	0.05
Supercontig_12.1:4400645:4401517:-@Supercontig_12.1:4398398:4400584:-	Intron retention	0.72	0.68	0.76	0.6	0.55	0.65	0.12	14.07
Supercontig_12.1:4401654:4401743:-@Supercontig_12.1:4398398:4401517:-	Intron retention	0.01	0.01	0.02	0.03	0.02	0.05	-0.02	0.45
Supercontig_12.1:4401654:4401743:-@Supercontig_12.1:4400645:4401517:-	Intron retention	0.02	0.01	0.03	0.04	0.02	0.05	-0.02	0.39
Supercontig_12.1:4402395:4402647:-@Supercontig_12.1:4401654:4401743:-	Intron retention	0.3	0.26	0.35	0.37	0.31	0.42	-0.07	0.46
Supercontig_12.1:4402395:4402946:-@Supercontig_12.1:4401654:4401743:-	Intron retention	0.26	0.22	0.3	0.35	0.3	0.4	-0.09	2.24
Supercontig_12.1:4402720:4402946:-@Supercontig_12.1:4402395:4402647:-	Intron retention	0.61	0.56	0.66	0.43	0.35	0.5	0.18	301.89
Supercontig_12.1:440381:440533:+@Supercontig_12.1:440589:441935:+	Intron retention	0	0	0.01	0.01	0	0.03	-0.01	0
Supercontig_12.1:4435306:4435698:+@Supercontig_12.1:4436179:4436612:+	Intron retention	0.64	0.59	0.7	0.69	0.63	0.75	-0.05	0.19
Supercontig_12.1:4435409:4436612:+@Supercontig_12.1:4436672:4439402:+	Intron retention	0.06	0.03	0.1	0.05	0.02	0.07	0.01	0.07
Supercontig_12.1:4436179:4436612:+@Supercontig_12.1:4436672:4439402:+	Intron retention	0.06	0.03	0.1	0.04	0.02	0.06	0.02	0.08
Supercontig_12.1:4449754:4450281:+@Supercontig_12.1:4450349:4451793:+	Intron retention	0.02	0	0.07	0.01	0	0.05	0.01	0.05
Supercontig_12.1:4454627:4454745:-@Supercontig_12.1:4453604:4454459:-	Intron retention	0.14	0.09	0.2	0.12	0.07	0.17	0.02	0.11
Supercontig_12.1:4458282:4458649:-@Supercontig_12.1:4456106:4458031:-	Intron retention	0.09	0.05	0.14	0.07	0.04	0.12	0.02	0.09
Supercontig_12.1:4491753:4491928:+@Supercontig_12.1:4492118:4492286:+	Intron retention	0.07	0.02	0.15	0.19	0.11	0.28	-0.12	1.37
Supercontig_12.1:4491753:4491928:+@Supercontig_12.1:4492129:4492286:+	Intron retention	0.03	0.01	0.07	0.1	0.06	0.15	-0.07	1.57
Supercontig_12.1:4492118:4492286:+@Supercontig_12.1:4492372:4492544:+	Intron retention	0.17	0.12	0.22	0.15	0.11	0.19	0.02	0.1
Supercontig_12.1:4492129:4492286:+@Supercontig_12.1:4492372:4492544:+	Intron retention	0.17	0.12	0.22	0.15	0.11	0.19	0.02	0.09
Supercontig_12.1:4492372:4492544:+@Supercontig_12.1:4492607:4492641:+	Intron retention	0.09	0.05	0.14	0.07	0.04	0.1	0.02	0.1
Supercontig_12.1:4492607:4492641:+@Supercontig_12.1:4492709:4493955:+	Intron retention	0.05	0.02	0.09	0.03	0.01	0.05	0.02	0.1
Supercontig_12.1:4493901:4494348:-@Supercontig_12.1:4493438:4493833:-	Intron retention	0.12	0.08	0.17	0.08	0.05	0.11	0.04	0.22
Supercontig_12.1:4495322:4496308:+@Supercontig_12.1:4496371:4496463:+	Intron retention	0.44	0.36	0.53	0.48	0.4	0.56	-0.04	0.19
Supercontig_12.1:4496371:4496463:+@Supercontig_12.1:4496521:4496546:+	Intron retention	0.62	0.5	0.73	0.65	0.47	0.8	-0.03	0.28
Supercontig_12.1:4496521:4496546:+@Supercontig_12.1:4496599:4497366:+	Intron retention	0.18	0.11	0.27	0.2	0.13	0.29	-0.02	0.16
Supercontig_12.1:4497370:4497570:-@Supercontig_12.1:4497183:4497308:-	Intron retention	0.04	0.02	0.08	0.16	0.1	0.23	-0.12	24.09
Supercontig_12.1:4497860:4498124:+@Supercontig_12.1:4498185:4498324:+	Intron retention	0.68	0.64	0.72	0.59	0.55	0.62	0.09	17.87
Supercontig_12.1:4498006:4498324:+@Supercontig_12.1:4498404:4498929:+	Intron retention	0.02	0.01	0.04	0.03	0.02	0.05	-0.01	0.05
Supercontig_12.1:4498185:4498324:+@Supercontig_12.1:4498404:4498929:+	Intron retention	0.03	0.01	0.05	0.04	0.02	0.06	-0.01	0.05
Supercontig_12.1:4509082:4509554:+@Supercontig_12.1:4509622:4511187:+	Intron retention	0	0	0.01	0.04	0.02	0.06	-0.04	3.12
Supercontig_12.1:4521076:4521611:+@Supercontig_12.1:4521736:4522268:+	Intron retention	0.01	0	0.01	0.01	0	0.01	0	0
Supercontig_12.1:4527705:4528659:+@Supercontig_12.1:4528718:4528831:+	Intron retention	0.16	0.03	0.38	0.66	0.43	0.88	-0.5	38.21
Supercontig_12.1:4550443:4550883:-@Supercontig_12.1:4548662:4550345:-	Intron retention	0.62	0.57	0.66	0.64	0.59	0.68	-0.02	0.1
Supercontig_12.1:455182:455214:+@Supercontig_12.1:455341:456143:+	Intron retention	0.89	0.63	0.99	0.26	0.04	0.67	0.63	16.05
Supercontig_12.1:4553397:4553596:+@Supercontig_12.1:4553914:4553946:+	Intron retention	0.15	0.13	0.19	0.08	0.07	0.1	0.07	5.11831e+07
Supercontig_12.1:4554654:4555088:+@Supercontig_12.1:4555158:4556315:+	Intron retention	0.01	0.01	0.02	0	0	0	0.01	1000000000000
Supercontig_12.1:4556949:4557215:+@Supercontig_12.1:4557277:4560052:+	Intron retention	0.03	0.01	0.07	0.13	0.08	0.19	-0.1	3.07
Supercontig_12.1:4561914:4562152:-@Supercontig_12.1:4560893:4561761:-	Intron retention	0.01	0	0.01	0.02	0.02	0.02	-0.01	1000000000000
Supercontig_12.1:4562429:4562551:-@Supercontig_12.1:4561914:4562152:-	Intron retention	0.03	0.03	0.03	0.01	0.01	0.01	0.02	1000000000000
Supercontig_12.1:4562637:4562877:-@Supercontig_12.1:4562429:4562551:-	Intron retention	0	0	0	0	0	0	0	0
Supercontig_12.1:4581902:4583628:+@Supercontig_12.1:4583695:4583794:+	Intron retention	0.1	0.03	0.21	0.09	0.03	0.19	0.01	0.14
Supercontig_12.1:4588557:4589068:+@Supercontig_12.1:4589132:4589658:+	Intron retention	0.08	0.05	0.12	0.04	0.02	0.07	0.04	0.29
Supercontig_12.1:4594346:4595772:-@Supercontig_12.1:4593684:4594283:-	Intron retention	0.95	0.86	0.99	0.92	0.83	0.98	0.03	0.14
Supercontig_12.1:45973:47636:-@Supercontig_12.1:45332:45913:-	Intron retention	0.06	0.02	0.12	0.02	0	0.05	0.04	0.27
Supercontig_12.1:4601002:4601398:-@Supercontig_12.1:4600335:4600737:-	Intron retention	0.06	0.04	0.07	0.04	0.02	0.05	0.02	0.22
Supercontig_12.1:4606270:4606472:+@Supercontig_12.1:4606534:4607622:+	Intron retention	0.02	0.01	0.06	0.04	0.02	0.08	-0.02	0.09
Supercontig_12.1:4609229:4609912:+@Supercontig_12.1:4610025:4611331:+	Intron retention	0.07	0.02	0.13	0.17	0.11	0.24	-0.1	1.95
Supercontig_12.1:4609229:4609917:+@Supercontig_12.1:4610025:4611331:+	Intron retention	0.13	0.04	0.24	0.25	0.16	0.36	-0.12	0.7
Supercontig_12.1:4620411:4620848:-@Supercontig_12.1:4615114:4620341:-	Intron retention	0.02	0	0.06	0.16	0.08	0.25	-0.14	147.36
Supercontig_12.1:4625403:4625468:-@Supercontig_12.1:4624441:4625214:-	Intron retention	0.01	0.01	0.01	0.01	0.01	0.01	0	0
Supercontig_12.1:4625540:4625953:-@Supercontig_12.1:4625403:4625468:-	Intron retention	0	0	0	0	0	0	0	0
Supercontig_12.1:4627289:4627801:+@Supercontig_12.1:4627894:4628524:+	Intron retention	0.85	0.78	0.92	0.94	0.82	0.99	-0.09	0.67
Supercontig_12.1:4650950:4651392:-@Supercontig_12.1:4650493:4650747:-	Intron retention	0.04	0.03	0.06	0.04	0.03	0.06	0	0.03
Supercontig_12.1:4654977:4655448:+@Supercontig_12.1:4655776:4657337:+	Intron retention	0.03	0.03	0.04	0.02	0.02	0.03	0.01	0.5
Supercontig_12.1:4658776:4659980:-@Supercontig_12.1:4657346:4658702:-	Intron retention	0.05	0.03	0.09	0.03	0.01	0.06	0.02	0.12
Supercontig_12.1:4660055:4660141:-@Supercontig_12.1:4658776:4659980:-	Intron retention	0.06	0.04	0.09	0.02	0	0.04	0.04	0.92
Supercontig_12.1:4660055:4660272:-@Supercontig_12.1:4658776:4659980:-	Intron retention	0.06	0.04	0.09	0.01	0	0.03	0.05	4.93
Supercontig_12.1:4660425:4660596:-@Supercontig_12.1:4660055:4660141:-	Intron retention	0.14	0.09	0.19	0.22	0.15	0.29	-0.08	0.59
Supercontig_12.1:4668568:4669180:-@Supercontig_12.1:4667290:4668486:-	Intron retention	0.05	0.02	0.09	0.04	0.02	0.07	0.01	0.07
Supercontig_12.1:4671805:4674747:+@Supercontig_12.1:4674826:4675260:+	Intron retention	0.08	0.06	0.11	0.07	0.06	0.1	0.01	0.04
Supercontig_12.1:4694770:4697377:+@Supercontig_12.1:4697441:4697885:+	Intron retention	0	0	0.01	0.01	0	0.01	-0.01	0
Supercontig_12.1:4705473:4706122:-@Supercontig_12.1:4704381:4705381:-	Intron retention	0.06	0.03	0.09	0.16	0.11	0.22	-0.1	15.99
Supercontig_12.1:4706182:4707471:-@Supercontig_12.1:4705473:4706122:-	Intron retention	0.05	0.02	0.09	0.04	0.02	0.09	0.01	0.07
Supercontig_12.1:4707747:4707855:-@Supercontig_12.1:4706182:4707471:-	Intron retention	0.13	0.08	0.19	0.17	0.11	0.24	-0.04	0.17
Supercontig_12.1:4707747:4707978:-@Supercontig_12.1:4706182:4707471:-	Intron retention	0.13	0.09	0.2	0.18	0.12	0.25	-0.05	0.18
Supercontig_12.1:4721986:4722787:+@Supercontig_12.1:4722872:4724286:+	Intron retention	0.06	0.02	0.12	0.06	0.02	0.11	0	0.08
Supercontig_12.1:4724694:4724884:+@Supercontig_12.1:4724990:4725174:+	Intron retention	0.02	0.01	0.03	0.02	0.01	0.03	0	0
Supercontig_12.1:4724990:4725174:+@Supercontig_12.1:4725375:4725728:+	Intron retention	0.04	0.03	0.07	0.03	0.01	0.04	0.01	0.07
Supercontig_12.1:4726806:4726978:+@Supercontig_12.1:4727170:4727871:+	Intron retention	0	0	0	0	0	0.01	0	0
Supercontig_12.1:4729056:4729348:-@Supercontig_12.1:4727832:4728964:-	Intron retention	0.23	0.05	0.5	0.03	0.01	0.08	0.2	1.19
Supercontig_12.1:4729543:4729973:-@Supercontig_12.1:4729451:4729485:-	Intron retention	0.57	0.22	0.98	0.76	0.39	0.98	-0.19	0.99
Supercontig_12.1:4730146:4730355:+@Supercontig_12.1:4730619:4730762:+	Intron retention	0.1	0.1	0.1	0.05	0.05	0.05	0.05	1000000000000
Supercontig_12.1:4730619:4730762:+@Supercontig_12.1:4730994:4732057:+	Intron retention	0.01	0.01	0.01	0.01	0.01	0.01	0	0
Supercontig_12.1:4734024:4734189:+@Supercontig_12.1:4734276:4734648:+	Intron retention	0.03	0.02	0.05	0.01	0	0.02	0.02	0.2
Supercontig_12.1:4747418:4747570:-@Supercontig_12.1:4746357:4747196:-	Intron retention	0	0	0.01	0	0	0.01	0	0
Supercontig_12.1:4748428:4748742:+@Supercontig_12.1:4748873:4748979:+	Intron retention	0.05	0.04	0.05	0.03	0.03	0.04	0.02	0.55
Supercontig_12.1:4748873:4748979:+@Supercontig_12.1:4749051:4749083:+	Intron retention	0.01	0	0.02	0.01	0	0.01	0	0
Supercontig_12.1:475012:475166:+@Supercontig_12.1:475227:478038:+	Intron retention	0.1	0.03	0.21	0.02	0	0.05	0.08	0.7
Supercontig_12.1:4795103:4795613:-@Supercontig_12.1:4793777:4795032:-	Intron retention	0.01	0	0.03	0.01	0	0.03	0	0
Supercontig_12.1:4798141:4800122:-@Supercontig_12.1:4796741:4798029:-	Intron retention	0.44	0.39	0.51	0.5	0.45	0.56	-0.06	0.3
Supercontig_12.1:4798141:4800876:-@Supercontig_12.1:4797109:4798029:-	Intron retention	0.45	0.39	0.51	0.51	0.45	0.56	-0.06	0.27
Supercontig_12.1:4800317:4800669:-@Supercontig_12.1:4797114:4800122:-	Intron retention	0.19	0.15	0.23	0.1	0.07	0.13	0.09	16.19
Supercontig_12.1:4800317:4800669:-@Supercontig_12.1:4798141:4800122:-	Intron retention	0.2	0.16	0.25	0.1	0.08	0.14	0.1	25.06
Supercontig_12.1:4806935:4807041:-@Supercontig_12.1:4803513:4806802:-	Intron retention	0.17	0.1	0.26	0.09	0.04	0.15	0.08	0.42
Supercontig_12.1:4806935:4807513:-@Supercontig_12.1:4803481:4806805:-	Intron retention	0.18	0.11	0.28	0.12	0.06	0.19	0.06	0.26
Supercontig_12.1:4809098:4810551:-@Supercontig_12.1:4807880:4809040:-	Intron retention	0.02	0	0.04	0.01	0	0.03	0.01	0.05
Supercontig_12.1:4810648:4810751:-@Supercontig_12.1:4809098:4810551:-	Intron retention	0.1	0.04	0.2	0.21	0.12	0.34	-0.11	0.53
Supercontig_12.1:4813307:4813715:-@Supercontig_12.1:4813006:4813215:-	Intron retention	0.07	0.05	0.11	0.1	0.07	0.13	-0.03	0.12
Supercontig_12.1:4820657:4820814:+@Supercontig_12.1:4820888:4821066:+	Intron retention	0.88	0.53	0.99	0.89	0.69	0.99	-0.01	0.25
Supercontig_12.1:4833727:4834124:+@Supercontig_12.1:4834179:4835622:+	Intron retention	0.02	0.01	0.04	0.04	0.03	0.06	-0.02	0.1
Supercontig_12.1:4846278:4846326:-@Supercontig_12.1:4844098:4846218:-	Intron retention	0.14	0.03	0.32	0.15	0.04	0.29	-0.01	0.25
Supercontig_12.1:4856183:4856464:+@Supercontig_12.1:4856528:4858481:+	Intron retention	0.7	0.32	0.98	0.66	0.36	0.88	0.04	0.67
Supercontig_12.1:4859557:4860620:-@Supercontig_12.1:4859006:4859352:-	Intron retention	0.03	0.01	0.05	0.05	0.03	0.08	-0.02	0.14
Supercontig_12.1:4860713:4860792:-@Supercontig_12.1:4859557:4860620:-	Intron retention	0.13	0.09	0.18	0.05	0.03	0.08	0.08	3.39
Supercontig_12.1:4862107:4862385:-@Supercontig_12.1:4861528:4862020:-	Intron retention	0	0	0.01	0.01	0	0.02	-0.01	0
Supercontig_12.1:4864046:4864143:-@Supercontig_12.1:4863093:4863990:-	Intron retention	0.01	0	0.02	0.01	0.01	0.03	0	0
Supercontig_12.1:4866343:4867561:-@Supercontig_12.1:4865470:4866275:-	Intron retention	0.02	0.01	0.03	0.03	0.02	0.04	-0.01	0
Supercontig_12.1:4868282:4868709:+@Supercontig_12.1:4868787:4869743:+	Intron retention	0.1	0.03	0.19	0.05	0.01	0.1	0.05	0.2
Supercontig_12.1:4874283:4874484:-@Supercontig_12.1:4874161:4874218:-	Intron retention	0.06	0.02	0.12	0.02	0	0.07	0.04	0.13
Supercontig_12.1:4886538:4886627:+@Supercontig_12.1:4886750:4886834:+	Intron retention	0	0	0	0	0	0	0	0
Supercontig_12.1:4886750:4886834:+@Supercontig_12.1:4887305:4888112:+	Intron retention	0.01	0.01	0.01	0.01	0.01	0.01	0	0
Supercontig_12.1:4891238:4891746:-@Supercontig_12.1:4888873:4891186:-	Intron retention	0	0	0.01	0.01	0	0.02	-0.01	0
Supercontig_12.1:4891238:4891746:-@Supercontig_12.1:4889006:4891186:-	Intron retention	0	0	0.01	0.01	0	0.02	-0.01	0
Supercontig_12.1:4892368:4892497:-@Supercontig_12.1:4891238:4891746:-	Intron retention	0.45	0.42	0.48	0.5	0.47	0.52	-0.05	0.5
Supercontig_12.1:4892368:4892965:-@Supercontig_12.1:4891238:4891746:-	Intron retention	0.49	0.46	0.53	0.55	0.52	0.58	-0.06	1.45
Supercontig_12.1:4907076:4907597:+@Supercontig_12.1:4907683:4909125:+	Intron retention	0.01	0.01	0.02	0.01	0	0.02	0	0
Supercontig_12.1:4909242:4910146:+@Supercontig_12.1:4910247:4910746:+	Intron retention	0.03	0.02	0.05	0.02	0	0.04	0.01	0.06
Supercontig_12.1:4913500:4914230:+@Supercontig_12.1:4914283:4915196:+	Intron retention	0.9	0.78	0.98	0.97	0.91	1	-0.07	0.27
Supercontig_12.1:4917485:4919402:-@Supercontig_12.1:4916976:4917400:-	Intron retention	0.08	0.04	0.14	0.09	0.04	0.14	-0.01	0.09
Supercontig_12.1:4919483:4919522:-@Supercontig_12.1:4917485:4919402:-	Intron retention	0.1	0.05	0.17	0.05	0.02	0.11	0.05	0.19
Supercontig_12.1:4920391:4920518:-@Supercontig_12.1:4920079:4920338:-	Intron retention	0.49	0.3	0.65	0.23	0.09	0.41	0.26	3.32
Supercontig_12.1:4920571:4920876:-@Supercontig_12.1:4920391:4920518:-	Intron retention	0.49	0.22	0.78	0.15	0.01	0.44	0.34	2.34
Supercontig_12.1:4920930:4921074:-@Supercontig_12.1:4920571:4920876:-	Intron retention	0.63	0.38	0.86	0.09	0.01	0.24	0.54	80.32
Supercontig_12.1:4921140:4921163:-@Supercontig_12.1:4920930:4921074:-	Intron retention	0.53	0.17	0.94	0.24	0.03	0.65	0.29	1.1
Supercontig_12.1:4925524:4926067:+@Supercontig_12.1:4926187:4926271:+	Intron retention	0.02	0.01	0.04	0.01	0	0.03	0.01	0.04
Supercontig_12.1:4930245:4930375:-@Supercontig_12.1:4927899:4930017:-	Intron retention	0.75	0.66	0.84	0.9	0.84	0.94	-0.15	3.1
Supercontig_12.1:4944106:4944222:-@Supercontig_12.1:4941986:4944031:-	Intron retention	0.64	0.5	0.8	0.61	0.47	0.74	0.03	0.28
Supercontig_12.1:4946283:4946802:+@Supercontig_12.1:4946885:4947993:+	Intron retention	0.49	0.38	0.61	0.46	0.36	0.57	0.03	0.22
Supercontig_12.1:4946885:4947993:+@Supercontig_12.1:4948045:4949261:+	Intron retention	0.18	0.1	0.3	0.52	0.41	0.62	-0.34	1.38513e+07
Supercontig_12.1:4953060:4954060:+@Supercontig_12.1:4954141:4954319:+	Intron retention	0.03	0.01	0.08	0.04	0.01	0.09	-0.01	0.07
Supercontig_12.1:4954141:4954319:+@Supercontig_12.1:4954415:4955119:+	Intron retention	0.13	0.07	0.19	0.18	0.11	0.28	-0.05	0.23
Supercontig_12.1:4957263:4957621:+@Supercontig_12.1:4957800:4957969:+	Intron retention	0.01	0.01	0.01	0.01	0	0.01	0	0
Supercontig_12.1:4958034:4958122:+@Supercontig_12.1:4958195:4959053:+	Intron retention	0	0	0.01	0.01	0	0.01	-0.01	0
Supercontig_12.1:4958034:4958122:+@Supercontig_12.1:4958195:4959389:+	Intron retention	0	0	0.01	0.01	0	0.01	-0.01	0
Supercontig_12.1:4959964:4960283:+@Supercontig_12.1:4960601:4960710:+	Intron retention	0.07	0.06	0.09	0.1	0.08	0.12	-0.03	0.42
Supercontig_12.1:4960789:4960914:+@Supercontig_12.1:4960989:4962481:+	Intron retention	0.02	0.01	0.04	0.06	0.04	0.09	-0.04	1.42
Supercontig_12.1:4960789:4960914:+@Supercontig_12.1:4960989:4962553:+	Intron retention	0.02	0.01	0.04	0.06	0.04	0.09	-0.04	2.64
Supercontig_12.1:4965082:4965280:+@Supercontig_12.1:4965350:4965637:+	Intron retention	0.01	0	0.02	0	0	0.01	0.01	0
Supercontig_12.1:4976966:4977305:-@Supercontig_12.1:4976201:4976885:-	Intron retention	0.77	0.57	0.92	0.69	0.33	0.95	0.08	0.53
Supercontig_12.1:4992229:4992294:+@Supercontig_12.1:4992366:4992414:+	Intron retention	0.01	0	0.01	0.01	0.01	0.01	0	0
Supercontig_12.1:4992366:4992414:+@Supercontig_12.1:4992473:4993348:+	Intron retention	0.05	0.04	0.06	0.05	0.04	0.06	0	0
Supercontig_12.1:5013211:5014016:+@Supercontig_12.1:5014091:5015191:+	Intron retention	0.1	0.05	0.16	0.14	0.08	0.2	-0.04	0.15
Supercontig_12.1:5017815:5018090:-@Supercontig_12.1:5015171:5017760:-	Intron retention	0.33	0.26	0.4	0.3	0.24	0.36	0.03	0.14
Supercontig_12.1:5018598:5018774:+@Supercontig_12.1:5018863:5019331:+	Intron retention	0.02	0.01	0.05	0.01	0	0.03	0.01	0.03
Supercontig_12.1:5025146:5026047:+@Supercontig_12.1:5026189:5026414:+	Intron retention	0.01	0	0.03	0.1	0.06	0.16	-0.09	97.42
Supercontig_12.1:5031594:5032257:+@Supercontig_12.1:5032317:5033162:+	Intron retention	0	0	0.01	0	0	0.01	0	0
Supercontig_12.1:5042275:5042642:-@Supercontig_12.1:5041287:5042061:-	Intron retention	0.02	0.01	0.03	0.04	0.02	0.05	-0.02	0.08
Supercontig_12.1:5097319:5098033:+@Supercontig_12.1:5098107:5098438:+	Intron retention	0.02	0.02	0.03	0.03	0.02	0.04	-0.01	0
Supercontig_12.1:5098107:5098438:+@Supercontig_12.1:5098530:5099468:+	Intron retention	0.04	0.03	0.06	0.06	0.04	0.07	-0.02	0.06
Supercontig_12.1:5104664:5104769:-@Supercontig_12.1:5104485:5104595:-	Intron retention	0.03	0.01	0.05	0.02	0.01	0.04	0.01	0.05
Supercontig_12.1:5105005:5105847:-@Supercontig_12.1:5104836:5104913:-	Intron retention	0.02	0.01	0.04	0.02	0.01	0.04	0	0.04
Supercontig_12.1:5123090:5123188:+@Supercontig_12.1:5123243:5126129:+	Intron retention	0.85	0.7	0.95	0.96	0.91	0.99	-0.11	0.52
Supercontig_12.1:5129010:5129622:+@Supercontig_12.1:5129719:5129830:+	Intron retention	0.07	0.03	0.12	0.04	0.02	0.09	0.03	0.11
Supercontig_12.1:5138146:5138303:-@Supercontig_12.1:5136814:5138084:-	Intron retention	0.05	0.03	0.08	0.03	0.02	0.05	0.02	0.08
Supercontig_12.1:5138375:5138708:-@Supercontig_12.1:5138146:5138303:-	Intron retention	0.04	0.01	0.1	0.05	0.02	0.09	-0.01	0.08
Supercontig_12.1:5152991:5153113:-@Supercontig_12.1:5151576:5152910:-	Intron retention	0.03	0.02	0.06	0.04	0.03	0.06	-0.01	0.04
Supercontig_12.1:5152991:5153113:-@Supercontig_12.1:5151620:5152910:-	Intron retention	0.03	0.02	0.06	0.04	0.03	0.06	-0.01	0.05
Supercontig_12.1:5153718:5154137:-@Supercontig_12.1:5152991:5153113:-	Intron retention	0.56	0.51	0.61	0.49	0.44	0.53	0.07	0.71
Supercontig_12.1:5153718:5154421:-@Supercontig_12.1:5152991:5153113:-	Intron retention	0.61	0.55	0.67	0.52	0.48	0.57	0.09	1.12
Supercontig_12.1:5154267:5154421:-@Supercontig_12.1:5153718:5154137:-	Intron retention	0.08	0.03	0.14	0.07	0.04	0.1	0.01	0.08
Supercontig_12.1:5157395:5158046:+@Supercontig_12.1:5158232:5158275:+	Intron retention	0.76	0.69	0.82	0.63	0.56	0.7	0.13	3.31
Supercontig_12.1:5157797:5158123:+@Supercontig_12.1:5158232:5158275:+	Intron retention	0.08	0.04	0.14	0.05	0.02	0.09	0.03	0.14
Supercontig_12.1:5158346:5158981:+@Supercontig_12.1:5159106:5159681:+	Intron retention	0.01	0	0.02	0.03	0.02	0.05	-0.02	0.43
Supercontig_12.1:5158346:5158981:+@Supercontig_12.1:5159106:5159689:+	Intron retention	0.01	0	0.02	0.03	0.02	0.05	-0.02	0.91
Supercontig_12.1:5167385:5167817:+@Supercontig_12.1:5168047:5168263:+	Intron retention	0.09	0.06	0.13	0.06	0.03	0.09	0.03	0.2
Supercontig_12.1:5168047:5168263:+@Supercontig_12.1:5168348:5169265:+	Intron retention	0.03	0.01	0.05	0.01	0	0.02	0.02	0.1
Supercontig_12.1:516836:517861:-@Supercontig_12.1:514506:516777:-	Intron retention	0.02	0.01	0.06	0.03	0.01	0.08	-0.01	0.06
Supercontig_12.1:5169870:5169957:-@Supercontig_12.1:5169183:5169771:-	Intron retention	0.13	0.08	0.18	0.2	0.14	0.27	-0.07	0.4
Supercontig_12.1:5169870:5170059:-@Supercontig_12.1:5169183:5169771:-	Intron retention	0.13	0.09	0.18	0.2	0.15	0.27	-0.07	0.48
Supercontig_12.1:5170295:5170951:-@Supercontig_12.1:5169870:5169957:-	Intron retention	0.11	0.08	0.13	0.09	0.07	0.11	0.02	0.07
Supercontig_12.1:5170295:5170951:-@Supercontig_12.1:5169870:5170059:-	Intron retention	0.08	0.06	0.11	0.07	0.05	0.1	0.01	0.06
Supercontig_12.1:5171306:5171474:+@Supercontig_12.1:5171540:5171615:+	Intron retention	0.11	0.1	0.12	0.06	0.05	0.07	0.05	1000000000000
Supercontig_12.1:5171540:5171615:+@Supercontig_12.1:5171677:5172354:+	Intron retention	0	0	0.01	0	0	0	0	0
Supercontig_12.1:5173316:5173512:-@Supercontig_12.1:5173022:5173158:-	Intron retention	0.13	0.1	0.16	0.18	0.15	0.21	-0.05	0.42
Supercontig_12.1:5174602:5174886:+@Supercontig_12.1:5174948:5175713:+	Intron retention	0.04	0.01	0.1	0.02	0.01	0.05	0.02	0.07
Supercontig_12.1:5176889:5178035:+@Supercontig_12.1:5178099:5178472:+	Intron retention	0.55	0.45	0.65	0.75	0.68	0.81	-0.2	19.5
Supercontig_12.1:5176889:5178035:+@Supercontig_12.1:5178216:5178453:+	Intron retention	0.79	0.68	0.89	0.95	0.88	0.99	-0.16	5.38
Supercontig_12.1:5185906:5187430:+@Supercontig_12.1:5187491:5189363:+	Intron retention	0.05	0.01	0.12	0.02	0	0.1	0.03	0.12
Supercontig_12.1:5190213:5190455:+@Supercontig_12.1:5190522:5190713:+	Intron retention	0.16	0.09	0.24	0.21	0.13	0.29	-0.05	0.22
Supercontig_12.1:5190522:5190713:+@Supercontig_12.1:5190912:5191382:+	Intron retention	0.27	0.21	0.33	0.49	0.41	0.56	-0.22	16473.1
Supercontig_12.1:5192741:5193106:+@Supercontig_12.1:5193243:5193448:+	Intron retention	0.01	0	0.02	0.01	0	0.02	0	0
Supercontig_12.1:5193243:5193448:+@Supercontig_12.1:5193505:5194877:+	Intron retention	0.01	0.01	0.03	0.03	0.01	0.05	-0.02	0.06
Supercontig_12.1:5193272:5193448:+@Supercontig_12.1:5193505:5194877:+	Intron retention	0.01	0	0.03	0.03	0.01	0.05	-0.02	0.07
Supercontig_12.1:5195234:5195350:+@Supercontig_12.1:5195707:5196176:+	Intron retention	0.06	0.04	0.08	0.07	0.05	0.1	-0.01	0.06
Supercontig_12.1:5203047:5204327:+@Supercontig_12.1:5204385:5205099:+	Intron retention	0.02	0	0.05	0.01	0	0.03	0.01	0.03
Supercontig_12.1:52048:52689:-@Supercontig_12.1:51019:51996:-	Intron retention	0.09	0.02	0.22	0.11	0.02	0.24	-0.02	0.18
Supercontig_12.1:521485:521645:-@Supercontig_12.1:520965:521414:-	Intron retention	0.04	0.01	0.07	0.05	0.02	0.08	-0.01	0.06
Supercontig_12.1:5215864:5216889:-@Supercontig_12.1:5215274:5215795:-	Intron retention	0.16	0.06	0.28	0.08	0.02	0.2	0.08	0.32
Supercontig_12.1:5218844:5219263:+@Supercontig_12.1:5219345:5219519:+	Intron retention	0.51	0.16	0.85	0.88	0.71	0.98	-0.37	1.7
Supercontig_12.1:521932:522200:+@Supercontig_12.1:522411:522853:+	Intron retention	0.01	0.01	0.02	0.01	0.01	0.02	0	0
Supercontig_12.1:5219345:5219519:+@Supercontig_12.1:5219596:5220018:+	Intron retention	0.49	0.29	0.69	0.56	0.37	0.73	-0.07	0.4
Supercontig_12.1:5220184:5221304:-@Supercontig_12.1:5219437:5220031:-	Intron retention	0.16	0.09	0.25	0.23	0.17	0.31	-0.07	0.38
Supercontig_12.1:5223335:5223824:-@Supercontig_12.1:5221686:5223278:-	Intron retention	0.02	0.01	0.02	0.03	0.03	0.04	-0.01	2.82
Supercontig_12.1:5223335:5223954:-@Supercontig_12.1:5221847:5223278:-	Intron retention	0.02	0.01	0.02	0.03	0.03	0.04	-0.01	3.97
Supercontig_12.1:5223335:5224087:-@Supercontig_12.1:5221902:5223278:-	Intron retention	0.02	0.01	0.02	0.04	0.03	0.04	-0.02	3.76
Supercontig_12.1:5224035:5224332:-@Supercontig_12.1:5223335:5223824:-	Intron retention	0.04	0.03	0.06	0.02	0.01	0.03	0.02	6430.52
Supercontig_12.1:5224035:5224332:-@Supercontig_12.1:5223335:5223954:-	Intron retention	0.02	0.01	0.04	0.01	0	0.02	0.01	0.08
Supercontig_12.1:5228721:5228824:-@Supercontig_12.1:5227128:5228330:-	Intron retention	0.36	0.32	0.41	0.31	0.27	0.34	0.05	0.33
Supercontig_12.1:5245308:5245755:+@Supercontig_12.1:5245926:5246110:+	Intron retention	0.2	0.15	0.27	0.01	0	0.02	0.19	1000000000000
Supercontig_12.1:5253531:5253713:+@Supercontig_12.1:5253920:5254020:+	Intron retention	0.2	0.19	0.21	0.21	0.21	0.22	-0.01	0.06
Supercontig_12.1:5253920:5254020:+@Supercontig_12.1:5254312:5255090:+	Intron retention	0.01	0.01	0.01	0.01	0	0.01	0	0
Supercontig_12.1:5257965:5258416:+@Supercontig_12.1:5258536:5258988:+	Intron retention	0.01	0.01	0.01	0	0	0	0.01	0
Supercontig_12.1:5265114:5265536:+@Supercontig_12.1:5265632:5267433:+	Intron retention	0.08	0.06	0.11	0.06	0.04	0.08	0.02	0.11
Supercontig_12.1:5267822:5268069:+@Supercontig_12.1:5268125:5269898:+	Intron retention	0.31	0.22	0.41	0.26	0.19	0.36	0.05	0.22
Supercontig_12.1:5270858:5271086:-@Supercontig_12.1:5270647:5270701:-	Intron retention	0.03	0.02	0.04	0.03	0.02	0.04	0	0
Supercontig_12.1:5272172:5272527:-@Supercontig_12.1:5271437:5272112:-	Intron retention	0	0	0.01	0.01	0	0.01	-0.01	0
Supercontig_12.1:5272596:5273016:-@Supercontig_12.1:5272172:5272527:-	Intron retention	0.04	0.03	0.06	0.02	0.02	0.04	0.02	0.1
Supercontig_12.1:5280439:5280701:+@Supercontig_12.1:5280908:5281235:+	Intron retention	0.14	0.1	0.18	0.08	0.06	0.11	0.06	0.96
Supercontig_12.1:5282702:5283054:-@Supercontig_12.1:5282530:5282641:-	Intron retention	0.01	0	0.02	0.01	0	0.01	0	0
Supercontig_12.1:5286824:5288184:-@Supercontig_12.1:5286209:5286741:-	Intron retention	0.03	0.01	0.06	0.08	0.05	0.11	-0.05	0.38
Supercontig_12.1:5292974:5293116:+@Supercontig_12.1:5293184:5293905:+	Intron retention	0.02	0	0.05	0.01	0	0.03	0.01	0.03
Supercontig_12.1:5303806:5305018:+@Supercontig_12.1:5305086:5305678:+	Intron retention	0.01	0	0.04	0.01	0	0.02	0	0.02
Supercontig_12.1:5310066:5310089:-@Supercontig_12.1:5308490:5310000:-	Intron retention	0.26	0.17	0.37	0.08	0.05	0.13	0.18	59.69
Supercontig_12.1:5310131:5310514:-@Supercontig_12.1:5308490:5310000:-	Intron retention	0.26	0.2	0.31	0.28	0.24	0.33	-0.02	0.13
Supercontig_12.1:5315576:5316655:-@Supercontig_12.1:5314454:5315508:-	Intron retention	0.05	0.02	0.08	0.11	0.07	0.16	-0.06	1.14
Supercontig_12.1:5344615:5344738:+@Supercontig_12.1:5344819:5345036:+	Intron retention	0.16	0.11	0.21	0.11	0.08	0.16	0.05	0.21
Supercontig_12.1:5344819:5345036:+@Supercontig_12.1:5345225:5345316:+	Intron retention	0.03	0.02	0.05	0.03	0.01	0.04	0	0.03
Supercontig_12.1:5347931:5347984:-@Supercontig_12.1:5346432:5347869:-	Intron retention	0	0	0.01	0.01	0	0.02	-0.01	0
Supercontig_12.1:5348044:5348163:-@Supercontig_12.1:5347931:5347984:-	Intron retention	0	0	0.01	0.01	0	0.01	-0.01	0
Supercontig_12.1:5348407:5349874:-@Supercontig_12.1:5348234:5348314:-	Intron retention	0.02	0.01	0.03	0	0	0.01	0.02	0.14
Supercontig_12.1:5348407:5350462:-@Supercontig_12.1:5348234:5348314:-	Intron retention	0.02	0.01	0.03	0	0	0.01	0.02	0.24
Supercontig_12.1:5350069:5350462:-@Supercontig_12.1:5348407:5349874:-	Intron retention	0.54	0.49	0.59	0.59	0.53	0.66	-0.05	0.22
Supercontig_12.1:5354523:5354623:-@Supercontig_12.1:5353969:5354459:-	Intron retention	0.02	0.01	0.02	0.02	0.02	0.02	0	0
Supercontig_12.1:5354680:5354775:-@Supercontig_12.1:5354523:5354623:-	Intron retention	0	0	0.01	0	0	0.01	0	0
Supercontig_12.1:5354946:5354955:-@Supercontig_12.1:5354680:5354775:-	Intron retention	0.39	0.35	0.42	0.18	0.16	0.2	0.21	1000000000000
Supercontig_12.1:5355097:5355311:-@Supercontig_12.1:5354946:5354955:-	Intron retention	0	0	0	0	0	0	0	0
Supercontig_12.1:5357503:5357829:+@Supercontig_12.1:5358055:5358127:+	Intron retention	0.01	0	0.01	0	0	0.01	0.01	0
Supercontig_12.1:536039:536167:+@Supercontig_12.1:536338:536446:+	Intron retention	0.07	0.06	0.09	0.11	0.09	0.13	-0.04	2.27
Supercontig_12.1:536262:536446:+@Supercontig_12.1:536532:538185:+	Intron retention	0.02	0.02	0.03	0.05	0.04	0.07	-0.03	1.19385e+07
Supercontig_12.1:536338:536446:+@Supercontig_12.1:536532:538185:+	Intron retention	0.02	0.02	0.03	0.05	0.04	0.06	-0.03	357513
Supercontig_12.1:5368489:5369314:-@Supercontig_12.1:5367754:5368419:-	Intron retention	0.17	0.12	0.22	0.17	0.13	0.21	0	0.08
Supercontig_12.1:5368515:5369375:-@Supercontig_12.1:5367754:5368419:-	Intron retention	0.2	0.16	0.24	0.26	0.22	0.31	-0.06	0.41
Supercontig_12.1:5371286:5372092:-@Supercontig_12.1:5369646:5371228:-	Intron retention	0.04	0.02	0.08	0.04	0.01	0.08	0	0.05
Supercontig_12.1:5374953:5375968:+@Supercontig_12.1:5376092:5377267:+	Intron retention	0.4	0.28	0.53	0.44	0.33	0.57	-0.04	0.25
Supercontig_12.1:5384565:5385959:-@Supercontig_12.1:5384461:5384494:-	Intron retention	0.09	0.05	0.14	0.09	0.05	0.14	0	0.09
Supercontig_12.1:538471:538676:-@Supercontig_12.1:537096:538352:-	Intron retention	0.01	0.01	0.02	0.01	0	0.02	0	0
Supercontig_12.1:5386025:5386656:-@Supercontig_12.1:5384565:5385959:-	Intron retention	0.15	0.08	0.25	0.55	0.33	0.81	-0.4	155.23
Supercontig_12.1:5386025:5386663:-@Supercontig_12.1:5384565:5385959:-	Intron retention	0.15	0.08	0.25	0.52	0.32	0.72	-0.37	186.83
Supercontig_12.1:539196:539788:+@Supercontig_12.1:540012:540343:+	Intron retention	0.37	0.34	0.4	0.21	0.19	0.23	0.16	1000000000000
Supercontig_12.1:5402488:5402824:+@Supercontig_12.1:5403228:5403808:+	Intron retention	0.08	0.08	0.09	0.04	0.04	0.04	0.04	1000000000000
Supercontig_12.1:5403228:5403808:+@Supercontig_12.1:5403872:5404005:+	Intron retention	0	0	0	0	0	0	0	0
Supercontig_12.1:5403872:5404005:+@Supercontig_12.1:5404091:5404521:+	Intron retention	0	0	0	0	0	0	0	0
Supercontig_12.1:5410973:5412580:-@Supercontig_12.1:5410375:5410876:-	Intron retention	0.09	0.07	0.11	0.19	0.17	0.22	-0.1	1000000000000
Supercontig_12.1:5412974:5413262:-@Supercontig_12.1:5412656:5412851:-	Intron retention	0.27	0.24	0.3	0.11	0.08	0.15	0.16	1000000000000
Supercontig_12.1:5414348:5414498:-@Supercontig_12.1:5413623:5414289:-	Intron retention	0.02	0.01	0.03	0.01	0.01	0.03	0.01	0
Supercontig_12.1:5416503:5416788:+@Supercontig_12.1:5416995:5417277:+	Intron retention	0.14	0.11	0.17	0.1	0.08	0.12	0.04	0.33
Supercontig_12.1:5416503:5416843:+@Supercontig_12.1:5416995:5417277:+	Intron retention	0.11	0.09	0.15	0.06	0.05	0.09	0.05	1.46
Supercontig_12.1:5416995:5417277:+@Supercontig_12.1:5417472:5417523:+	Intron retention	0	0	0.01	0.01	0.01	0.02	-0.01	0
Supercontig_12.1:5417472:5417523:-@Supercontig_12.1:5416503:5417277:-	Intron retention	0.01	0	0.02	0.02	0.01	0.03	-0.01	0.06
Supercontig_12.1:5417862:5418018:+@Supercontig_12.1:5418078:5418463:+	Intron retention	0.01	0	0.02	0	0	0.01	0.01	0
Supercontig_12.1:5437117:5437468:-@Supercontig_12.1:5436125:5437064:-	Intron retention	0.19	0.1	0.28	0.09	0.03	0.16	0.1	0.59
Supercontig_12.1:5437787:5437914:-@Supercontig_12.1:5437519:5437722:-	Intron retention	0.12	0.06	0.2	0.04	0.01	0.07	0.08	0.74
Supercontig_12.1:5439786:5439913:+@Supercontig_12.1:5440035:5440771:+	Intron retention	0.08	0.06	0.11	0.03	0.02	0.05	0.05	48.12
Supercontig_12.1:5441168:5441654:-@Supercontig_12.1:5440226:5441110:-	Intron retention	0.07	0.03	0.11	0.04	0.02	0.07	0.03	0.12
Supercontig_12.1:5443564:5443876:+@Supercontig_12.1:5443940:5444003:+	Intron retention	0.07	0.02	0.13	0.07	0.03	0.13	0	0.1
Supercontig_12.1:5443940:5444003:+@Supercontig_12.1:5444065:5445174:+	Intron retention	0.09	0.04	0.17	0.03	0.01	0.06	0.06	0.44
Supercontig_12.1:5444065:5445174:+@Supercontig_12.1:5445244:5446299:+	Intron retention	0.02	0	0.06	0.03	0.01	0.05	-0.01	0.05
Supercontig_12.1:5448003:5448126:-@Supercontig_12.1:5447368:5447747:-	Intron retention	0	0	0.01	0	0	0.01	0	0
Supercontig_12.1:5448185:5448495:-@Supercontig_12.1:5448003:5448126:-	Intron retention	0.01	0.01	0.02	0.02	0.02	0.02	-0.01	0
Supercontig_12.1:5449020:5449418:-@Supercontig_12.1:5448579:5448637:-	Intron retention	0.24	0.2	0.28	0.32	0.28	0.35	-0.08	3.95
Supercontig_12.1:5464013:5464555:+@Supercontig_12.1:5464611:5465551:+	Intron retention	0.01	0	0.03	0.01	0	0.03	0	0
Supercontig_12.1:5471551:5472119:+@Supercontig_12.1:5472201:5472732:+	Intron retention	0.02	0.01	0.04	0.03	0.01	0.05	-0.01	0.04
Supercontig_12.1:5476822:5477040:+@Supercontig_12.1:5477282:5477471:+	Intron retention	0.07	0.06	0.08	0.04	0.03	0.04	0.03	1000000000000
Supercontig_12.1:5477282:5477471:+@Supercontig_12.1:5477623:5478213:+	Intron retention	0.01	0	0.01	0.01	0.01	0.01	0	0
Supercontig_12.1:5480475:5481225:-@Supercontig_12.1:5478642:5480222:-	Intron retention	0.34	0.21	0.49	0.44	0.29	0.6	-0.1	0.4
Supercontig_12.1:5480475:5481225:-@Supercontig_12.1:5478642:5480258:-	Intron retention	0.06	0.02	0.11	0.19	0.12	0.27	-0.13	7.26
Supercontig_12.1:5504654:5505206:-@Supercontig_12.1:5503951:5504595:-	Intron retention	0.1	0.06	0.17	0.17	0.11	0.24	-0.07	0.38
Supercontig_12.1:5507423:5507599:-@Supercontig_12.1:5507053:5507363:-	Intron retention	0	0	0	0	0	0	0	0
Supercontig_12.1:5507665:5507849:-@Supercontig_12.1:5507423:5507599:-	Intron retention	0	0	0	0	0	0	0	0
Supercontig_12.1:5508264:5508311:-@Supercontig_12.1:5507665:5507849:-	Intron retention	0.01	0.01	0.01	0.02	0.02	0.02	-0.01	0
Supercontig_12.1:5510027:5510438:+@Supercontig_12.1:5510535:5510821:+	Intron retention	0.04	0.01	0.12	0.11	0.06	0.2	-0.07	0.48
Supercontig_12.1:5510027:5510438:+@Supercontig_12.1:5510535:5511173:+	Intron retention	0.04	0.01	0.1	0.11	0.05	0.19	-0.07	0.51
Supercontig_12.1:5510535:5510821:+@Supercontig_12.1:5510878:5511184:+	Intron retention	0.49	0.37	0.61	0.51	0.41	0.61	-0.02	0.22
Supercontig_12.1:5512723:5512901:-@Supercontig_12.1:5512232:5512662:-	Intron retention	0.21	0.09	0.36	0.84	0.57	0.99	-0.63	9486.38
Supercontig_12.1:5520354:5521403:-@Supercontig_12.1:5519246:5520036:-	Intron retention	0.16	0.1	0.23	0.1	0.07	0.15	0.06	0.26
Supercontig_12.1:554251:554362:+@Supercontig_12.1:554433:555385:+	Intron retention	0.08	0.03	0.13	0.08	0.04	0.12	0	0.09
Supercontig_12.1:5548548:5548763:+@Supercontig_12.1:5548935:5549182:+	Intron retention	0.86	0.78	0.92	0.81	0.71	0.89	0.05	0.22
Supercontig_12.1:5548548:5548763:+@Supercontig_12.1:5549053:5549182:+	Intron retention	0.67	0.61	0.73	0.55	0.49	0.62	0.12	2.9
Supercontig_12.1:5553006:5553312:+@Supercontig_12.1:5553432:5554016:+	Intron retention	0	0	0	0	0	0.01	0	0
Supercontig_12.1:5559218:5559231:+@Supercontig_12.1:5559287:5560712:+	Intron retention	0.02	0	0.06	0.02	0	0.06	0	0.05
Supercontig_12.1:5559218:5560712:+@Supercontig_12.1:5560785:5562248:+	Intron retention	0.47	0.42	0.52	0.56	0.51	0.61	-0.09	1.76
Supercontig_12.1:5559287:5560712:+@Supercontig_12.1:5560785:5562248:+	Intron retention	0.47	0.42	0.52	0.56	0.51	0.61	-0.09	1.76
Supercontig_12.1:5571440:5571489:-@Supercontig_12.1:5565797:5571163:-	Intron retention	0.19	0.15	0.24	0.07	0.05	0.1	0.12	2.8339e+06
Supercontig_12.1:5580712:5581149:+@Supercontig_12.1:5581340:5581742:+	Intron retention	0.16	0.11	0.23	0.22	0.17	0.28	-0.06	0.27
Supercontig_12.1:5604742:5605079:-@Supercontig_12.1:5602446:5604679:-	Intron retention	0.25	0.17	0.35	0.36	0.28	0.44	-0.11	0.68
Supercontig_12.1:5607519:5607564:-@Supercontig_12.1:5607037:5607443:-	Intron retention	0.04	0.01	0.08	0.04	0.01	0.1	0	0.06
Supercontig_12.1:5607772:5608244:-@Supercontig_12.1:5607519:5607564:-	Intron retention	0.08	0.05	0.12	0.09	0.05	0.15	-0.01	0.08
Supercontig_12.1:5607772:5608244:-@Supercontig_12.1:5607642:5607674:-	Intron retention	0.03	0.01	0.06	0.1	0.04	0.16	-0.07	0.67
Supercontig_12.1:5610572:5611378:-@Supercontig_12.1:5608414:5610313:-	Intron retention	0.29	0.19	0.41	0.43	0.32	0.56	-0.14	0.68
Supercontig_12.1:5615094:5615405:-@Supercontig_12.1:5613191:5615011:-	Intron retention	0.11	0.05	0.18	0.01	0	0.04	0.1	4.94
Supercontig_12.1:5616778:5617374:-@Supercontig_12.1:5616276:5616714:-	Intron retention	0.02	0	0.06	0.1	0.05	0.17	-0.08	2.49
Supercontig_12.1:561916:562798:-@Supercontig_12.1:560708:561847:-	Intron retention	0.01	0	0.01	0	0	0	0.01	0
Supercontig_12.1:5621093:5621875:-@Supercontig_12.1:5620528:5620997:-	Intron retention	0.04	0.02	0.06	0.04	0.03	0.06	0	0.04
Supercontig_12.1:5644221:5644892:+@Supercontig_12.1:5644966:5645068:+	Intron retention	0.04	0.02	0.07	0.06	0.03	0.1	-0.02	0.11
Supercontig_12.1:5648829:5650227:+@Supercontig_12.1:5650301:5650826:+	Intron retention	0.14	0.05	0.26	0.32	0.19	0.47	-0.18	1.5
Supercontig_12.1:5651369:5651471:+@Supercontig_12.1:5651553:5651699:+	Intron retention	0.25	0.14	0.37	0.09	0.05	0.13	0.16	6.27
Supercontig_12.1:5656703:5657014:+@Supercontig_12.1:5657075:5657706:+	Intron retention	0.06	0.01	0.15	0.11	0.04	0.22	-0.05	0.23
Supercontig_12.1:5657970:5658471:+@Supercontig_12.1:5658551:5659369:+	Intron retention	0	0	0.01	0.01	0	0.01	-0.01	0
Supercontig_12.1:5679534:5679737:-@Supercontig_12.1:5679139:5679215:-	Intron retention	0.91	0.87	0.95	0.85	0.78	0.91	0.06	0.37
Supercontig_12.1:5679872:5680129:+@Supercontig_12.1:5680184:5680379:+	Intron retention	0.02	0.01	0.04	0.04	0.02	0.07	-0.02	0.13
Supercontig_12.1:5680184:5680379:+@Supercontig_12.1:5680470:5680802:+	Intron retention	0.01	0	0.03	0.04	0.02	0.06	-0.03	0.49
Supercontig_12.1:5680470:5680802:+@Supercontig_12.1:5680865:5681225:+	Intron retention	0	0	0.01	0.01	0	0.01	-0.01	0
Supercontig_12.1:5681772:5681846:-@Supercontig_12.1:5680387:5681639:-	Intron retention	0.01	0.01	0.01	0.01	0.01	0.01	0	0
Supercontig_12.1:5681906:5681996:-@Supercontig_12.1:5681772:5681846:-	Intron retention	0.01	0.01	0.01	0.03	0.02	0.03	-0.02	5.98609e+09
Supercontig_12.1:5682113:5682240:-@Supercontig_12.1:5681906:5681996:-	Intron retention	0.02	0.01	0.02	0.02	0.02	0.03	0	0
Supercontig_12.1:5682412:5683345:+@Supercontig_12.1:5683403:5684084:+	Intron retention	0.03	0.01	0.05	0.05	0.03	0.07	-0.02	0.08
Supercontig_12.1:5683403:5684084:+@Supercontig_12.1:5684147:5685312:+	Intron retention	0.02	0.01	0.04	0.04	0.02	0.06	-0.02	0.12
Supercontig_12.1:5689510:5690012:+@Supercontig_12.1:5690089:5693876:+	Intron retention	0.02	0	0.07	0.03	0	0.09	-0.01	0.07
Supercontig_12.1:5695465:5695672:-@Supercontig_12.1:5695129:5695373:-	Intron retention	0.01	0.01	0.02	0	0	0.01	0.01	0
Supercontig_12.1:5695465:5696161:-@Supercontig_12.1:5695129:5695373:-	Intron retention	0.02	0.01	0.02	0.01	0	0.01	0.01	639.23
Supercontig_12.1:5696142:5696458:-@Supercontig_12.1:5695465:5695672:-	Intron retention	0.19	0.18	0.21	0.14	0.13	0.15	0.05	1.03404e+09
Supercontig_12.1:5697598:5697993:+@Supercontig_12.1:5698102:5698479:+	Intron retention	0.03	0.01	0.04	0.04	0.03	0.06	-0.01	0.09
Supercontig_12.1:5701325:5701597:-@Supercontig_12.1:5698364:5701247:-	Intron retention	0.29	0.17	0.43	0.29	0.19	0.41	0	0.24
Supercontig_12.1:5708298:5708371:-@Supercontig_12.1:5707892:5708220:-	Intron retention	0	0	0.01	0	0	0.01	0	0
Supercontig_12.1:5708509:5708566:-@Supercontig_12.1:5708298:5708371:-	Intron retention	0	0	0.01	0.02	0.01	0.03	-0.02	10.04
Supercontig_12.1:5714030:5714835:-@Supercontig_12.1:5713676:5713947:-	Intron retention	0.62	0.54	0.71	0.71	0.65	0.78	-0.09	0.5
Supercontig_12.1:5714299:5714582:-@Supercontig_12.1:5713676:5713947:-	Intron retention	0.8	0.72	0.87	0.82	0.76	0.88	-0.02	0.14
Supercontig_12.1:571641:572791:-@Supercontig_12.1:570732:571565:-	Intron retention	0.01	0	0.03	0.02	0	0.04	-0.01	0.03
Supercontig_12.1:5717158:5720431:-@Supercontig_12.1:5716041:5716760:-	Intron retention	0.09	0.07	0.11	0.1	0.08	0.12	-0.01	0.05
Supercontig_12.1:5726504:5727082:-@Supercontig_12.1:5724687:5726427:-	Intron retention	0.02	0.01	0.03	0.02	0.01	0.04	0	0
Supercontig_12.1:5728448:5728917:-@Supercontig_12.1:5727235:5728329:-	Intron retention	0.01	0.01	0.01	0.01	0.01	0.01	0	0
Supercontig_12.1:574311:574716:+@Supercontig_12.1:574801:575996:+	Intron retention	0.05	0.03	0.08	0.05	0.03	0.09	0	0.05
Supercontig_12.1:5776958:5777728:+@Supercontig_12.1:5777895:5778271:+	Intron retention	0.06	0.04	0.08	0.07	0.05	0.09	-0.01	0.05
Supercontig_12.1:5777895:5778271:+@Supercontig_12.1:5778340:5778510:+	Intron retention	0.05	0.03	0.07	0.01	0.01	0.02	0.04	16.87
Supercontig_12.1:5786451:5787122:-@Supercontig_12.1:5785732:5786363:-	Intron retention	0.02	0.01	0.04	0.01	0.01	0.02	0.01	0
Supercontig_12.1:5787230:5787628:-@Supercontig_12.1:5786451:5787122:-	Intron retention	0.09	0.07	0.11	0.13	0.1	0.15	-0.04	0.47
Supercontig_12.1:5789185:5789746:+@Supercontig_12.1:5789824:5791279:+	Intron retention	0.03	0.01	0.05	0.02	0	0.05	0.01	0.05
Supercontig_12.1:5795456:5795745:-@Supercontig_12.1:5795047:5795350:-	Intron retention	0.34	0.16	0.56	0.09	0.02	0.2	0.25	3.01
Supercontig_12.1:5795826:5796013:-@Supercontig_12.1:5795456:5795745:-	Intron retention	0.4	0.22	0.59	0.23	0.1	0.39	0.17	0.87
Supercontig_12.1:5796085:5796435:-@Supercontig_12.1:5795826:5796013:-	Intron retention	0.21	0.09	0.4	0.28	0.14	0.45	-0.07	0.37
Supercontig_12.1:5799204:5799367:-@Supercontig_12.1:5798272:5799083:-	Intron retention	0.03	0.02	0.05	0.03	0.02	0.05	0	0
Supercontig_12.1:5799436:5799522:-@Supercontig_12.1:5799204:5799367:-	Intron retention	0.01	0	0.03	0.01	0	0.02	0	0
Supercontig_12.1:5811446:5811563:+@Supercontig_12.1:5811641:5811705:+	Intron retention	0.04	0.01	0.09	0.08	0.04	0.14	-0.04	0.16
Supercontig_12.1:5811641:5811705:+@Supercontig_12.1:5811779:5813552:+	Intron retention	0.03	0.01	0.07	0.02	0.01	0.05	0.01	0.05
Supercontig_12.1:5816362:5817080:+@Supercontig_12.1:5817487:5818277:+	Intron retention	0.23	0.19	0.26	0.14	0.12	0.17	0.09	644.64
Supercontig_12.1:5822712:5823118:+@Supercontig_12.1:5823268:5824199:+	Intron retention	0.01	0	0.03	0.04	0.03	0.07	-0.03	0.42
Supercontig_12.1:5827428:5828653:+@Supercontig_12.1:5828716:5828834:+	Intron retention	0.06	0.02	0.13	0.04	0.01	0.08	0.02	0.09
Supercontig_12.1:5828716:5828834:+@Supercontig_12.1:5828892:5829126:+	Intron retention	0.28	0.17	0.41	0.22	0.14	0.31	0.06	0.24
Supercontig_12.1:5831618:5832238:+@Supercontig_12.1:5832300:5834143:+	Intron retention	0.15	0.08	0.25	0.04	0.01	0.1	0.11	1.73
Supercontig_12.1:5845748:5847904:-@Supercontig_12.1:5845361:5845678:-	Intron retention	0.02	0.01	0.03	0.03	0.02	0.04	-0.01	0.03
Supercontig_12.1:5860484:5861393:+@Supercontig_12.1:5861523:5862013:+	Intron retention	0.02	0.01	0.03	0.01	0.01	0.02	0.01	0
Supercontig_12.1:5861523:5862013:+@Supercontig_12.1:5862125:5862178:+	Intron retention	0.04	0.03	0.06	0.03	0.02	0.05	0.01	0.05
Supercontig_12.1:5862125:5862178:+@Supercontig_12.1:5862353:5862597:+	Intron retention	0.09	0.06	0.11	0.12	0.09	0.15	-0.03	0.17
Supercontig_12.1:5862353:5862597:-@Supercontig_12.1:5861523:5862013:-	Intron retention	0.07	0.05	0.09	0.08	0.07	0.1	-0.01	0.05
Supercontig_12.1:5862658:5864300:-@Supercontig_12.1:5862353:5862597:-	Intron retention	0.01	0	0.01	0	0	0.01	0.01	0
Supercontig_12.1:5884085:5884178:+@Supercontig_12.1:5884256:5884439:+	Intron retention	0.92	0.77	1	0.91	0.81	0.98	0.01	0.2
Supercontig_12.1:5884085:5884439:+@Supercontig_12.1:5884524:5885993:+	Intron retention	0.01	0	0.04	0.01	0	0.03	0	0
Supercontig_12.1:5884256:5884439:+@Supercontig_12.1:5884524:5888390:+	Intron retention	0.01	0	0.03	0.01	0	0.02	0	0
Supercontig_12.1:5901814:5902177:-@Supercontig_12.1:5901440:5901591:-	Intron retention	0.17	0.16	0.19	0.17	0.15	0.18	0	0.03
Supercontig_12.1:5945766:5946062:+@Supercontig_12.1:5946175:5946305:+	Intron retention	0.03	0.03	0.04	0.06	0.06	0.07	-0.03	1000000000000
Supercontig_12.1:5946175:5946305:-@Supercontig_12.1:5945167:5945759:-	Intron retention	0.03	0.03	0.03	0.07	0.06	0.07	-0.04	1000000000000
Supercontig_12.1:5946175:5946305:+@Supercontig_12.1:5946379:5946724:+	Intron retention	0.02	0.02	0.02	0.07	0.06	0.07	-0.05	1000000000000
Supercontig_12.1:5946379:5946724:+@Supercontig_12.1:5946781:5947804:+	Intron retention	0	0	0	0	0	0	0	0
Supercontig_12.1:5946781:5948228:-@Supercontig_12.1:5946379:5946724:-	Intron retention	0	0	0	0	0	0	0	0
Supercontig_12.1:596107:596976:-@Supercontig_12.1:593883:596037:-	Intron retention	0.06	0.02	0.12	0.04	0.01	0.08	0.02	0.09
Supercontig_12.1:597623:598183:+@Supercontig_12.1:598264:598772:+	Intron retention	0.03	0.02	0.05	0.01	0.01	0.02	0.02	1.65
Supercontig_12.1:597822:598183:+@Supercontig_12.1:598264:599464:+	Intron retention	0.04	0.02	0.05	0.02	0.01	0.02	0.02	1.56
Supercontig_12.1:5978681:5979049:+@Supercontig_12.1:5979123:5983001:+	Intron retention	0.2	0.1	0.32	0.17	0.09	0.27	0.03	0.22
Supercontig_12.1:5978785:5979026:+@Supercontig_12.1:5979123:5983001:+	Intron retention	0.19	0.11	0.28	0.13	0.08	0.21	0.06	0.21
Supercontig_12.1:5989400:5989547:-@Supercontig_12.1:5988632:5989342:-	Intron retention	0.01	0	0.02	0.01	0.01	0.03	0	0
Supercontig_12.1:5989609:5989675:-@Supercontig_12.1:5989400:5989547:-	Intron retention	0	0	0.02	0.03	0.01	0.05	-0.03	0.45
Supercontig_12.1:5989733:5989778:-@Supercontig_12.1:5989609:5989675:-	Intron retention	0.4	0.2	0.6	0.16	0.05	0.29	0.24	1.79
Supercontig_12.1:5992669:5993027:-@Supercontig_12.1:5991254:5992602:-	Intron retention	0	0	0	0	0	0	0	0
Supercontig_12.1:5993213:5993287:-@Supercontig_12.1:5993082:5993150:-	Intron retention	0	0	0	0	0	0	0	0
Supercontig_12.1:5999913:6000635:+@Supercontig_12.1:6000687:6001484:+	Intron retention	0.02	0	0.05	0.01	0	0.03	0.01	0.03
Supercontig_12.1:6013542:6013856:+@Supercontig_12.1:6014059:6014145:+	Intron retention	0.13	0.05	0.24	0.25	0.15	0.37	-0.12	0.57
Supercontig_12.1:6013542:6013856:+@Supercontig_12.1:6014059:6014149:+	Intron retention	0.13	0.05	0.22	0.25	0.15	0.37	-0.12	0.82
Supercontig_12.1:602009:602122:-@Supercontig_12.1:599620:601956:-	Intron retention	0.88	0.77	0.96	0.93	0.86	0.97	-0.05	0.21
Supercontig_12.1:6028440:6029707:+@Supercontig_12.1:6029794:6029976:+	Intron retention	0.43	0.22	0.64	0.47	0.24	0.72	-0.04	0.45
Supercontig_12.1:6037760:6039211:-@Supercontig_12.1:6037229:6037690:-	Intron retention	0.06	0.03	0.09	0.02	0.01	0.03	0.04	1.05
Supercontig_12.1:6039626:6039933:+@Supercontig_12.1:6039999:6040759:+	Intron retention	0.01	0.01	0.01	0	0	0	0.01	0
Supercontig_12.1:6039660:6039933:+@Supercontig_12.1:6039999:6040759:+	Intron retention	0.01	0.01	0.01	0	0	0	0.01	0
Supercontig_12.1:6040819:6041045:+@Supercontig_12.1:6041261:6042015:+	Intron retention	0.18	0.16	0.21	0.06	0.05	0.07	0.12	1000000000000
Supercontig_12.1:6058423:6058789:-@Supercontig_12.1:6056898:6058265:-	Intron retention	0.02	0.01	0.02	0.01	0.01	0.02	0.01	0
Supercontig_12.1:6060685:6061221:-@Supercontig_12.1:6060077:6060625:-	Intron retention	0.01	0.01	0.02	0.01	0	0.02	0	0
Supercontig_12.1:6062257:6062653:+@Supercontig_12.1:6062722:6063625:+	Intron retention	0.07	0.03	0.12	0.01	0	0.04	0.06	0.51
Supercontig_12.1:6062257:6062653:+@Supercontig_12.1:6062722:6063672:+	Intron retention	0.07	0.03	0.12	0.01	0	0.04	0.06	0.66
Supercontig_12.1:6064330:6064428:+@Supercontig_12.1:6064584:6066002:+	Intron retention	0.13	0.07	0.19	0.02	0	0.04	0.11	72.94
Supercontig_12.1:6070178:6070790:+@Supercontig_12.1:6070872:6071439:+	Intron retention	0.04	0.02	0.07	0.02	0.01	0.03	0.02	0.09
Supercontig_12.1:6070872:6071439:+@Supercontig_12.1:6071512:6072411:+	Intron retention	0.03	0.01	0.05	0.02	0.01	0.04	0.01	0.04
Supercontig_12.1:6082840:6083060:-@Supercontig_12.1:6082244:6082747:-	Intron retention	0.05	0.03	0.08	0.05	0.02	0.11	0	0.06
Supercontig_12.1:6083300:6084352:-@Supercontig_12.1:6082840:6083060:-	Intron retention	0.55	0.47	0.63	0.54	0.42	0.65	0.01	0.19
Supercontig_12.1:6083300:6084644:-@Supercontig_12.1:6082840:6083060:-	Intron retention	0.59	0.51	0.68	0.56	0.45	0.68	0.03	0.21
Supercontig_12.1:6084413:6084644:-@Supercontig_12.1:6083300:6084352:-	Intron retention	0.6	0.53	0.67	0.26	0.16	0.37	0.34	1.65986e+06
Supercontig_12.1:6084805:6085473:-@Supercontig_12.1:6083300:6084644:-	Intron retention	0.05	0.02	0.09	0.21	0.1	0.35	-0.16	3.03
Supercontig_12.1:6084805:6085636:-@Supercontig_12.1:6084413:6084644:-	Intron retention	0.18	0.08	0.35	0.3	0.17	0.45	-0.12	0.55
Supercontig_12.1:6088158:6088604:+@Supercontig_12.1:6088663:6092398:+	Intron retention	0.04	0.01	0.08	0.01	0	0.03	0.03	0.11
Supercontig_12.1:6111415:6112204:+@Supercontig_12.1:6112265:6112495:+	Intron retention	0.18	0.13	0.23	0.08	0.06	0.11	0.1	66.35
Supercontig_12.1:6112265:6112495:+@Supercontig_12.1:6112553:6115757:+	Intron retention	0.04	0.02	0.07	0.11	0.07	0.15	-0.07	1.75
Supercontig_12.1:6123751:6125242:-@Supercontig_12.1:6123268:6123691:-	Intron retention	0.07	0.03	0.13	0.03	0.01	0.07	0.04	0.18
Supercontig_12.1:6125303:6125381:-@Supercontig_12.1:6123751:6125242:-	Intron retention	0.03	0	0.06	0.01	0	0.03	0.02	0.05
Supercontig_12.1:6131541:6132072:-@Supercontig_12.1:6130028:6131159:-	Intron retention	0.04	0.03	0.05	0.04	0.03	0.05	0	0
Supercontig_12.1:6142453:6142587:+@Supercontig_12.1:6143029:6143279:+	Intron retention	0.16	0.13	0.2	0.23	0.2	0.27	-0.07	2.06
Supercontig_12.1:6142480:6142657:+@Supercontig_12.1:6143029:6143279:+	Intron retention	0.05	0.03	0.07	0.04	0.03	0.06	0.01	0.03
Supercontig_12.1:6148168:6149413:-@Supercontig_12.1:6147310:6148103:-	Intron retention	0	0	0.01	0	0	0	0	0
Supercontig_12.1:6150554:6150970:-@Supercontig_12.1:6150098:6150454:-	Intron retention	0.05	0.02	0.11	0.17	0.12	0.23	-0.12	3.87
Supercontig_12.1:6151142:6151600:-@Supercontig_12.1:6150554:6150970:-	Intron retention	0.09	0.06	0.12	0.08	0.05	0.12	0.01	0.06
Supercontig_12.1:6151813:6152025:-@Supercontig_12.1:6151656:6151743:-	Intron retention	0.03	0.01	0.05	0.05	0.03	0.08	-0.02	0.11
Supercontig_12.1:6151813:6152932:-@Supercontig_12.1:6151656:6151743:-	Intron retention	0.03	0.01	0.05	0.06	0.03	0.09	-0.03	0.15
Supercontig_12.1:6152292:6152743:-@Supercontig_12.1:6151813:6152025:-	Intron retention	0.1	0.07	0.13	0.13	0.1	0.16	-0.03	0.21
Supercontig_12.1:6158890:6160672:+@Supercontig_12.1:6160762:6166641:+	Intron retention	0.03	0	0.07	0.03	0	0.07	0	0.05
Supercontig_12.1:616029:616777:+@Supercontig_12.1:616846:618210:+	Intron retention	0.01	0	0.02	0.01	0	0.02	0	0
Supercontig_12.1:6195677:6197131:-@Supercontig_12.1:6193126:6195604:-	Intron retention	0.54	0.37	0.73	0.63	0.51	0.74	-0.09	0.41
Supercontig_12.1:6200201:6200653:+@Supercontig_12.1:6200713:6201099:+	Intron retention	0.01	0	0.02	0.02	0.01	0.03	-0.01	0.03
Supercontig_12.1:6206672:6208245:+@Supercontig_12.1:6208315:6208984:+	Intron retention	0.04	0.03	0.06	0.1	0.08	0.12	-0.06	2.0041e+07
Supercontig_12.1:62094:62565:+@Supercontig_12.1:62635:62950:+	Intron retention	0.6	0.43	0.76	0.54	0.27	0.86	0.06	0.46
Supercontig_12.1:6209912:6210059:-@Supercontig_12.1:6208916:6209841:-	Intron retention	0.01	0	0.01	0	0	0.01	0.01	0
Supercontig_12.1:6210164:6210424:-@Supercontig_12.1:6209912:6210059:-	Intron retention	0	0	0.01	0	0	0	0	0
Supercontig_12.1:6210706:6210892:+@Supercontig_12.1:6210959:6211010:+	Intron retention	0.03	0	0.09	0.01	0	0.03	0.02	0.07
Supercontig_12.1:6210959:6211010:+@Supercontig_12.1:6211083:6212363:+	Intron retention	0.08	0.04	0.15	0.11	0.06	0.18	-0.03	0.13
Supercontig_12.1:6219887:6219960:-@Supercontig_12.1:6218799:6219768:-	Intron retention	0.06	0.02	0.11	0.2	0.12	0.3	-0.14	4.03
Supercontig_12.1:625039:625443:+@Supercontig_12.1:625526:625986:+	Intron retention	0	0	0	0	0	0	0	0
Supercontig_12.1:626753:627362:+@Supercontig_12.1:627419:629087:+	Intron retention	0.03	0.01	0.08	0.01	0	0.04	0.02	0.11
Supercontig_12.1:6274087:6274336:-@Supercontig_12.1:6272570:6274010:-	Intron retention	0.01	0	0.01	0.01	0	0.01	0	0
Supercontig_12.1:6274087:6274575:-@Supercontig_12.1:6272570:6274010:-	Intron retention	0.01	0	0.01	0.01	0	0.01	0	0
Supercontig_12.1:627419:629087:+@Supercontig_12.1:629165:629587:+	Intron retention	0.02	0.01	0.05	0.02	0.01	0.05	0	0.03
Supercontig_12.1:6274401:6274575:-@Supercontig_12.1:6274087:6274336:-	Intron retention	0.19	0.17	0.22	0.15	0.13	0.17	0.04	1.54
Supercontig_12.1:6291877:6292493:-@Supercontig_12.1:6289284:6291756:-	Intron retention	0.48	0.4	0.58	0.54	0.47	0.62	-0.06	0.24
Supercontig_12.1:6295972:6296440:+@Supercontig_12.1:6296507:6297125:+	Intron retention	0.4	0.24	0.58	0.24	0.13	0.4	0.16	0.82
Supercontig_12.1:631764:631804:-@Supercontig_12.1:631577:631626:-	Intron retention	0.85	0.63	0.99	0.36	0.15	0.62	0.49	28.36
Supercontig_12.1:6337133:6338047:+@Supercontig_12.1:6338143:6339107:+	Intron retention	0.12	0.08	0.16	0.1	0.07	0.15	0.02	0.08
Supercontig_12.1:6340522:6341292:-@Supercontig_12.1:6339630:6340405:-	Intron retention	0.17	0.14	0.21	0.16	0.12	0.2	0.01	0.08
Supercontig_12.1:6359775:6359849:-@Supercontig_12.1:6358376:6359715:-	Intron retention	0.03	0.02	0.05	0.07	0.05	0.09	-0.04	0.62
Supercontig_12.1:6359909:6359980:-@Supercontig_12.1:6359775:6359849:-	Intron retention	0.02	0	0.04	0.03	0.02	0.06	-0.01	0.07
Supercontig_12.1:6364107:6364439:-@Supercontig_12.1:6363644:6364039:-	Intron retention	0.05	0.03	0.07	0.05	0.04	0.06	0	0.03
Supercontig_12.1:6364782:6365396:+@Supercontig_12.1:6365461:6365738:+	Intron retention	0.02	0	0.06	0.05	0.01	0.11	-0.03	0.15
Supercontig_12.1:6378755:6380618:-@Supercontig_12.1:6377952:6378677:-	Intron retention	0.02	0.01	0.03	0.02	0.01	0.03	0	0
Supercontig_12.1:6457101:6457409:-@Supercontig_12.1:6456247:6457014:-	Intron retention	0.01	0.01	0.02	0.02	0.01	0.03	-0.01	0
Supercontig_12.1:6467198:6468500:-@Supercontig_12.1:6466804:6467120:-	Intron retention	0.03	0.01	0.07	0.01	0	0.05	0.02	0.06
Supercontig_12.1:6468613:6468714:-@Supercontig_12.1:6467198:6468500:-	Intron retention	0.63	0.42	0.96	0.31	0.23	0.41	0.32	11.09
Supercontig_12.1:6468613:6469993:-@Supercontig_12.1:6467198:6468500:-	Intron retention	0.85	0.64	0.99	0.41	0.29	0.53	0.44	314.02
Supercontig_12.1:6469119:6469993:-@Supercontig_12.1:6468613:6468714:-	Intron retention	0.93	0.79	0.99	0.86	0.72	0.97	0.07	0.34
Supercontig_12.1:6483455:6484462:-@Supercontig_12.1:6483063:6483376:-	Intron retention	0.23	0.1	0.43	0.47	0.24	0.81	-0.24	1.33
Supercontig_12.1:6484530:6484729:-@Supercontig_12.1:6483455:6484462:-	Intron retention	0.11	0.03	0.21	0.07	0.01	0.23	0.04	0.21
Supercontig_12.1:6494075:6494245:-@Supercontig_12.1:6493466:6493982:-	Intron retention	0.04	0.01	0.07	0.03	0.01	0.06	0.01	0.04
Supercontig_12.1:6494075:6497118:-@Supercontig_12.1:6493485:6493982:-	Intron retention	0.04	0.02	0.08	0.03	0.01	0.06	0.01	0.06
Supercontig_12.1:6507402:6507538:-@Supercontig_12.1:6506885:6507126:-	Intron retention	0.68	0.56	0.8	0.72	0.6	0.83	-0.04	0.26
Supercontig_12.1:6507927:6508134:-@Supercontig_12.1:6507402:6507538:-	Intron retention	0.75	0.63	0.86	0.73	0.61	0.83	0.02	0.22
Supercontig_12.1:6509606:6510047:-@Supercontig_12.1:6509214:6509538:-	Intron retention	0.03	0.02	0.05	0.04	0.03	0.06	-0.01	0.05
Supercontig_12.1:6510555:6510573:-@Supercontig_12.1:6510193:6510478:-	Intron retention	0.13	0.07	0.2	0.13	0.08	0.18	0	0.11
Supercontig_12.1:6513544:6513696:+@Supercontig_12.1:6513759:6513926:+	Intron retention	0.04	0.04	0.05	0.03	0.03	0.03	0.01	1000000000000
Supercontig_12.1:6513759:6513926:+@Supercontig_12.1:6513993:6514119:+	Intron retention	0	0	0	0	0	0	0	0
Supercontig_12.1:6513993:6514119:+@Supercontig_12.1:6514178:6514647:+	Intron retention	0.02	0.02	0.02	0.02	0.01	0.02	0	0
Supercontig_12.1:652513:652711:+@Supercontig_12.1:653134:653794:+	Intron retention	0.08	0.06	0.11	0.09	0.07	0.11	-0.01	0.05
Supercontig_12.1:6540857:6541057:+@Supercontig_12.1:6541251:6541327:+	Intron retention	0.01	0	0.01	0	0	0.01	0.01	0
Supercontig_12.1:6541251:6541327:+@Supercontig_12.1:6541644:6541940:+	Intron retention	0	0	0.01	0	0	0	0	0
Supercontig_12.1:6541644:6541940:+@Supercontig_12.1:6542003:6543550:+	Intron retention	0	0	0.01	0	0	0	0	0
Supercontig_12.1:6544790:6545037:-@Supercontig_12.1:6544165:6544430:-	Intron retention	0.07	0.06	0.09	0.04	0.04	0.05	0.03	1.72039e+08
Supercontig_12.1:6545136:6545566:-@Supercontig_12.1:6544790:6545037:-	Intron retention	0.01	0.01	0.02	0.01	0.01	0.02	0	0
Supercontig_12.1:6545790:6545987:+@Supercontig_12.1:6546051:6548172:+	Intron retention	0.41	0.31	0.53	0.21	0.14	0.29	0.2	11.13
Supercontig_12.1:6545904:6545950:+@Supercontig_12.1:6546051:6548172:+	Intron retention	0.4	0.29	0.52	0.25	0.17	0.36	0.15	1.21
Supercontig_12.1:6553181:6553267:+@Supercontig_12.1:6553346:6553409:+	Intron retention	0.49	0.4	0.57	0.71	0.61	0.79	-0.22	46.15
Supercontig_12.1:6553346:6553409:+@Supercontig_12.1:6553470:6553832:+	Intron retention	0.49	0.39	0.58	0.35	0.27	0.43	0.14	1.15
Supercontig_12.1:6554094:6554255:-@Supercontig_12.1:6553004:6554036:-	Intron retention	0.07	0.05	0.09	0.05	0.03	0.08	0.02	0.08
Supercontig_12.1:6560358:6560934:-@Supercontig_12.1:6557894:6560301:-	Intron retention	0.03	0	0.08	0.06	0.02	0.1	-0.03	0.12
Supercontig_12.1:6561211:6561513:+@Supercontig_12.1:6561764:6562051:+	Intron retention	0.25	0.22	0.28	0.21	0.19	0.23	0.04	0.63
Supercontig_12.1:6561211:6561513:+@Supercontig_12.1:6561768:6562051:+	Intron retention	0.38	0.34	0.43	0.41	0.38	0.44	-0.03	0.1
Supercontig_12.1:6561764:6562051:+@Supercontig_12.1:6562125:6562857:+	Intron retention	0.06	0.04	0.08	0.08	0.06	0.09	-0.02	0.08
Supercontig_12.1:6561768:6562051:+@Supercontig_12.1:6562125:6562857:+	Intron retention	0.06	0.04	0.08	0.08	0.06	0.09	-0.02	0.08
Supercontig_12.1:6562125:6562857:+@Supercontig_12.1:6562972:6563449:+	Intron retention	0.14	0.11	0.17	0.02	0.01	0.03	0.12	1000000000000
Supercontig_12.1:6577307:6577458:-@Supercontig_12.1:6576079:6577238:-	Intron retention	0	0	0.01	0	0	0	0	0
Supercontig_12.1:6577535:6578079:-@Supercontig_12.1:6576524:6577458:-	Intron retention	0.01	0	0.01	0	0	0	0.01	0
Supercontig_12.1:6577535:6578163:-@Supercontig_12.1:6577307:6577458:-	Intron retention	0.01	0	0.01	0	0	0	0.01	0
Supercontig_12.1:6582757:6583038:-@Supercontig_12.1:6581266:6582680:-	Intron retention	0.01	0.01	0.02	0.02	0.02	0.03	-0.01	0
Supercontig_12.1:6583631:6584222:-@Supercontig_12.1:6583093:6583363:-	Intron retention	0.02	0.01	0.02	0.01	0.01	0.01	0.01	0
Supercontig_12.1:6590446:6590848:+@Supercontig_12.1:6590911:6591715:+	Intron retention	0.04	0.02	0.06	0.03	0.02	0.05	0.01	0.04
Supercontig_12.1:6591961:6592626:+@Supercontig_12.1:6592702:6593651:+	Intron retention	0.04	0.01	0.09	0.08	0.04	0.13	-0.04	0.15
Supercontig_12.1:6595702:6596237:-@Supercontig_12.1:6594170:6595600:-	Intron retention	0.05	0.01	0.13	0.12	0.07	0.19	-0.07	0.5
Supercontig_12.1:6598633:6599096:-@Supercontig_12.1:6598064:6598572:-	Intron retention	0	0	0.01	0	0	0	0	0
Supercontig_12.1:6599210:6600359:-@Supercontig_12.1:6598633:6599096:-	Intron retention	0	0	0.01	0	0	0.01	0	0
Supercontig_12.1:6600966:6601728:+@Supercontig_12.1:6601797:6603322:+	Intron retention	0.15	0.06	0.26	0.1	0.05	0.16	0.05	0.17
Supercontig_12.1:6610849:6613928:-@Supercontig_12.1:6609624:6610775:-	Intron retention	0.41	0.16	0.68	0.73	0.31	0.98	-0.32	2.21
Supercontig_12.1:662389:662846:-@Supercontig_12.1:661989:662328:-	Intron retention	0.11	0.03	0.23	0.04	0	0.12	0.07	0.22
Supercontig_12.1:6624343:6624736:+@Supercontig_12.1:6624829:6624944:+	Intron retention	0.05	0.02	0.09	0.1	0.05	0.16	-0.05	0.29
Supercontig_12.1:6625019:6625263:+@Supercontig_12.1:6625325:6625820:+	Intron retention	0.04	0.01	0.12	0.06	0.02	0.13	-0.02	0.12
Supercontig_12.1:6625325:6625820:+@Supercontig_12.1:6625874:6627731:+	Intron retention	0.06	0.02	0.11	0.14	0.08	0.21	-0.08	0.61
Supercontig_12.1:662903:663664:-@Supercontig_12.1:662389:662846:-	Intron retention	0.08	0.04	0.13	0.06	0.03	0.13	0.02	0.09
Supercontig_12.1:6629345:6629603:+@Supercontig_12.1:6629677:6630835:+	Intron retention	0.15	0.11	0.2	0.09	0.05	0.13	0.06	1.04
Supercontig_12.1:6638317:6638615:+@Supercontig_12.1:6638685:6638739:+	Intron retention	0	0	0.01	0.01	0	0.01	-0.01	0
Supercontig_12.1:6638685:6638739:+@Supercontig_12.1:6638849:6639323:+	Intron retention	0.04	0.03	0.06	0.01	0.01	0.03	0.03	3.64
Supercontig_12.1:6669606:6669760:+@Supercontig_12.1:6669835:6669966:+	Intron retention	0.99	0.97	1	0.87	0.83	0.9	0.12	1000000000000
Supercontig_12.1:6669606:6669805:+@Supercontig_12.1:6669873:6669966:+	Intron retention	0.85	0.8	0.9	0.84	0.79	0.88	0.01	0.1
Supercontig_12.1:6669606:6669966:+@Supercontig_12.1:6670036:6670126:+	Intron retention	0.02	0.01	0.04	0.06	0.04	0.08	-0.04	0.41
Supercontig_12.1:6669835:6669966:+@Supercontig_12.1:6670036:6670126:+	Intron retention	0.03	0.01	0.04	0.06	0.04	0.09	-0.03	0.42
Supercontig_12.1:6669873:6669966:+@Supercontig_12.1:6670036:6670126:+	Intron retention	0.03	0.01	0.04	0.06	0.04	0.09	-0.03	0.68
Supercontig_12.1:6670036:6670126:+@Supercontig_12.1:6670228:6671824:+	Intron retention	0.02	0.01	0.03	0.04	0.02	0.06	-0.02	0.08
Supercontig_12.1:6687487:6687600:-@Supercontig_12.1:6686820:6687251:-	Intron retention	0.59	0.52	0.66	0.41	0.36	0.45	0.18	4904.83
Supercontig_12.1:6698999:6701155:+@Supercontig_12.1:6701213:6702605:+	Intron retention	0.02	0	0.06	0.01	0	0.03	0.01	0.04
Supercontig_12.1:6712367:6712672:-@Supercontig_12.1:6710750:6712186:-	Intron retention	0.17	0.13	0.2	0.16	0.13	0.2	0.01	0.07
Supercontig_12.1:6712735:6712973:-@Supercontig_12.1:6712367:6712672:-	Intron retention	0.06	0.03	0.11	0.04	0.01	0.07	0.02	0.12
Supercontig_12.1:6732450:6732652:+@Supercontig_12.1:6732726:6735625:+	Intron retention	0.18	0.12	0.25	0.23	0.16	0.31	-0.05	0.2
Supercontig_12.1:6746887:6746902:-@Supercontig_12.1:6746719:6746826:-	Intron retention	0.08	0.01	0.29	0.05	0	0.18	0.03	0.17
Supercontig_12.1:6746887:6746996:-@Supercontig_12.1:6746719:6746826:-	Intron retention	0.04	0.01	0.12	0.07	0.02	0.15	-0.03	0.14
Supercontig_12.1:6750485:6751199:-@Supercontig_12.1:6750224:6750423:-	Intron retention	0	0	0	0	0	0	0	0
Supercontig_12.1:6751285:6751863:-@Supercontig_12.1:6750485:6751199:-	Intron retention	0	0	0	0	0	0	0	0
Supercontig_12.1:6751916:6751985:-@Supercontig_12.1:6751285:6751863:-	Intron retention	0.01	0.01	0.02	0.01	0	0.02	0	0
Supercontig_12.1:6754343:6755208:-@Supercontig_12.1:6752091:6754291:-	Intron retention	0.26	0.19	0.34	0.45	0.37	0.53	-0.19	50.43
Supercontig_12.1:6780501:6781376:-@Supercontig_12.1:6780015:6780309:-	Intron retention	0.1	0.08	0.12	0.08	0.07	0.09	0.02	0.19
Supercontig_12.1:6781448:6782745:-@Supercontig_12.1:6780501:6781376:-	Intron retention	0.02	0.01	0.03	0.02	0.01	0.02	0	0
Supercontig_12.1:6807058:6807399:+@Supercontig_12.1:6807487:6807589:+	Intron retention	0.02	0.01	0.03	0.01	0.01	0.03	0.01	0
Supercontig_12.1:6807487:6807589:+@Supercontig_12.1:6807672:6808188:+	Intron retention	0.01	0	0.03	0.01	0	0.02	0	0
Supercontig_12.1:6808270:6808407:+@Supercontig_12.1:6808485:6810098:+	Intron retention	0.05	0.03	0.07	0.05	0.03	0.08	0	0.05
Supercontig_12.1:6810196:6810674:+@Supercontig_12.1:6810755:6812205:+	Intron retention	0.07	0.04	0.11	0.04	0.02	0.06	0.03	0.16
Supercontig_12.1:6813377:6813559:-@Supercontig_12.1:6812522:6813226:-	Intron retention	0.01	0	0.01	0	0	0	0.01	0
Supercontig_12.1:6813624:6813683:-@Supercontig_12.1:6813377:6813559:-	Intron retention	0	0	0.01	0	0	0.01	0	0
Supercontig_12.1:6816498:6817767:-@Supercontig_12.1:6815517:6816411:-	Intron retention	0.08	0.05	0.11	0.04	0.02	0.06	0.04	0.57
Supercontig_12.1:6817925:6819124:-@Supercontig_12.1:6816498:6817767:-	Intron retention	0.06	0.04	0.09	0.02	0	0.04	0.04	1.5
Supercontig_12.1:6841933:6842655:-@Supercontig_12.1:6840119:6841860:-	Intron retention	0.04	0.01	0.08	0.03	0.01	0.06	0.01	0.06
Supercontig_12.1:6842941:6843489:+@Supercontig_12.1:6843548:6843594:+	Intron retention	0.04	0.03	0.06	0.1	0.08	0.12	-0.06	11938.2
Supercontig_12.1:6843548:6843594:+@Supercontig_12.1:6843656:6843847:+	Intron retention	0.05	0.04	0.07	0.01	0.01	0.02	0.04	2.96817e+06
Supercontig_12.1:6843656:6843847:+@Supercontig_12.1:6843915:6844961:+	Intron retention	0.01	0.01	0.02	0.03	0.02	0.04	-0.02	2.25
Supercontig_12.1:6851802:6851870:-@Supercontig_12.1:6851544:6851728:-	Intron retention	0.7	0.63	0.77	0.86	0.8	0.91	-0.16	89.29
Supercontig_12.1:6861564:6861819:+@Supercontig_12.1:6861872:6862692:+	Intron retention	0.19	0.11	0.28	0.11	0.06	0.18	0.08	0.3
Supercontig_12.1:6862694:6863058:+@Supercontig_12.1:6863159:6864828:+	Intron retention	0.09	0.06	0.12	0.06	0.03	0.09	0.03	0.16
Supercontig_12.1:6878944:6879717:+@Supercontig_12.1:6879839:6880167:+	Intron retention	0	0	0.01	0.01	0.01	0.02	-0.01	0
Supercontig_12.1:6879839:6880167:+@Supercontig_12.1:6880295:6881270:+	Intron retention	0.05	0.04	0.07	0.06	0.04	0.07	-0.01	0.04
Supercontig_12.1:6880295:6880970:-@Supercontig_12.1:6879839:6880167:-	Intron retention	0.05	0.03	0.07	0.05	0.04	0.07	0	0.03
Supercontig_12.1:6884760:6884782:+@Supercontig_12.1:6884839:6885685:+	Intron retention	0.03	0	0.07	0.01	0	0.04	0.02	0.05
Supercontig_12.1:6884760:6885685:+@Supercontig_12.1:6885760:6887564:+	Intron retention	0	0	0.01	0.01	0	0.02	-0.01	0
Supercontig_12.1:6884839:6885685:+@Supercontig_12.1:6885760:6887564:+	Intron retention	0.01	0	0.01	0.01	0	0.02	0	0
Supercontig_12.1:6887780:6888370:+@Supercontig_12.1:6888425:6888894:+	Intron retention	0.07	0.05	0.09	0.31	0.2	0.43	-0.24	4.92874e+06
Supercontig_12.1:6901541:6901613:+@Supercontig_12.1:6901675:6901793:+	Intron retention	0.52	0.14	0.98	0.32	0.08	0.66	0.2	1
Supercontig_12.1:6914626:6915541:-@Supercontig_12.1:6913757:6914556:-	Intron retention	0.09	0.03	0.15	0.02	0.01	0.06	0.07	0.38
Supercontig_12.1:6922133:6922640:-@Supercontig_12.1:6921148:6921950:-	Intron retention	0.05	0.03	0.08	0.03	0.02	0.06	0.02	0.09
Supercontig_12.1:6932628:6933026:-@Supercontig_12.1:6932375:6932542:-	Intron retention	0.08	0.02	0.19	0.05	0.01	0.12	0.03	0.15
Supercontig_12.1:6974569:6974805:-@Supercontig_12.1:6974432:6974515:-	Intron retention	0.18	0.04	0.37	0.12	0.03	0.27	0.06	0.29
Supercontig_12.1:6985221:6985883:-@Supercontig_12.1:6984105:6985136:-	Intron retention	0.04	0.03	0.06	0.01	0.01	0.03	0.03	1.5
Supercontig_12.1:7025184:7026207:+@Supercontig_12.1:7026268:7027168:+	Intron retention	0.23	0.14	0.32	0.18	0.11	0.27	0.05	0.22
Supercontig_12.1:7027224:7027883:+@Supercontig_12.1:7028012:7028233:+	Intron retention	0.35	0.29	0.43	0.53	0.47	0.59	-0.18	30.47
Supercontig_12.1:7028295:7029415:+@Supercontig_12.1:7029477:7030337:+	Intron retention	0.01	0	0.02	0	0	0.01	0.01	0
Supercontig_12.1:7036170:7036490:+@Supercontig_12.1:7036574:7036689:+	Intron retention	0.01	0	0.03	0.03	0.01	0.06	-0.02	0.1
Supercontig_12.1:7036761:7036787:+@Supercontig_12.1:7036866:7036996:+	Intron retention	0.04	0.02	0.09	0.04	0.01	0.08	0	0.07
Supercontig_12.1:7058161:7058441:-@Supercontig_12.1:7057779:7058095:-	Intron retention	0.08	0.04	0.12	0.01	0	0.02	0.07	19.69
Supercontig_12.1:7075553:7075986:-@Supercontig_12.1:7075379:7075479:-	Intron retention	0.13	0.08	0.22	0.05	0.02	0.08	0.08	1.5
Supercontig_12.1:7103214:7104125:-@Supercontig_12.1:7101915:7103130:-	Intron retention	0.01	0.01	0.03	0.03	0.01	0.04	-0.02	0.07
Supercontig_12.1:7104312:7104685:-@Supercontig_12.1:7103214:7104125:-	Intron retention	0.18	0.15	0.22	0.12	0.1	0.15	0.06	1.68
[truncated: 4,237 more rows]

## Sheet: Supplemental Table 2
Supplemental Table 2
Events show 5'SS splicing changes in DD12/DD20
Event name	Isoform X/Total in DD12	95% lower confidence limit in DD12	95% higher confidence limit in DD12	Isoform X/Total in DD20	95% lower confidence limit in DD20	95% higher confidence limit in DD20	∆ Isoform X/Total in DD12 vs. DD20	Bayes factor
Supercontig_12.3:3798572:3798677|3798673:+@Supercontig_12.3:3798736:3798800:+	0.02	0	0.06	0.28	0.22	0.34	-0.26	1000000000000
Supercontig_12.7:685916:685631|685556:-@Supercontig_12.7:684215:685248:-	0.02	0.02	0.03	0.2	0.18	0.22	-0.18	1000000000000
Supercontig_12.1:6061391:6062128|6061814:+@Supercontig_12.1:6062257:6062653:+	0.38	0.32	0.44	0.56	0.49	0.63	-0.18	98.76
Supercontig_12.1:1267870:1267828|1267776:-@Supercontig_12.1:1267568:1267710:-	0.79	0.68	0.89	0.97	0.91	1	-0.18	21.74
Supercontig_12.3:4180235:4180492|4180487:+@Supercontig_12.3:4180567:4181106:+	0.03	0.01	0.06	0.17	0.11	0.25	-0.14	7313.45
Supercontig_12.7:1767138:1766540|1766490:-@Supercontig_12.7:1765151:1766109:-	0.07	0.06	0.07	0.19	0.18	0.2	-0.12	1000000000000
Supercontig_12.3:3146510:3146187|3146183:-@Supercontig_12.3:3142667:3146025:-	0.02	0	0.05	0.12	0.07	0.2	-0.1	19.18
Supercontig_12.3:3878726:3879398|3878878:+@Supercontig_12.3:3879428:3879555:+	0.17	0.15	0.19	0.07	0.06	0.08	0.1	1000000000000
Supercontig_12.5:5496224:5495575|5495571:-@Supercontig_12.5:5494992:5495516:-	0.68	0.66	0.71	0.57	0.53	0.61	0.11	3.57461e+08
Supercontig_12.4:3643205:3642567|3642548:-@Supercontig_12.4:3642330:3642490:-	0.99	0.95	1	0.85	0.75	0.93	0.14	43.64
Supercontig_12.1:3674855:3675260|3674910:+@Supercontig_12.1:3675302:3675715:+	0.28	0.26	0.31	0.13	0.12	0.14	0.15	1000000000000
Supercontig_12.1:5413262:5412974|5412962:-@Supercontig_12.1:5412656:5412851:-	0.33	0.3	0.37	0.14	0.1	0.18	0.19	1000000000000
Supercontig_12.1:7919484:7919183|7919139:-@Supercontig_12.1:7918930:7919035:-	0.6	0.54	0.66	0.39	0.33	0.45	0.21	4004.7
Supercontig_12.6:3362030:3363927|3363669:+@Supercontig_12.6:3364002:3364815:+	0.78	0.74	0.81	0.54	0.48	0.61	0.24	1000000000000
Supercontig_12.7:3121921:3122119|3122114:+@Supercontig_12.7:3122175:3124264:+	0.77	0.45	0.96	0.28	0.18	0.38	0.49	13.39

## Sheet: Supplemental Table 3
Supplemental Table 3
Events show 3'SS splicing changes in DD12/DD20
Event name	Isoform X/Total in DD12	95% lower confidence limit in DD12	95% higher confidence limit in DD12	Isoform X/Total in DD20	95% lower confidence limit in DD20	95% higher confidence limit in DD20	∆ Isoform X/Total in DD12 vs. DD20	Bayes factor
Supercontig_12.6:790795:790887:-@Supercontig_12.6:790647|790671:790553:-	0.28	0.11	0.51	0.99	0.97	1	-0.71	1000000000000
Supercontig_12.1:2464154:2464277:+@Supercontig_12.1:2464380|2464557:2464725:+	0.37	0.31	0.45	0.97	0.88	1	-0.6	1000000000000
Supercontig_12.1:4107436:4107966:+@Supercontig_12.1:4108024|4108064:4108145:+	0.06	0	0.19	0.63	0.38	0.84	-0.57	9972.8
Supercontig_12.4:4559765:4560179:+@Supercontig_12.4:4560259|4560271:4562110:+	0.17	0.05	0.35	0.73	0.39	0.93	-0.56	48.25
Supercontig_12.5:1911077:1911233:+@Supercontig_12.5:1911355|1911384:1911517:+	0.09	0.01	0.26	0.56	0.34	0.75	-0.47	2048.08
Supercontig_12.3:2713571:2714951:+@Supercontig_12.3:2715013|2715022:2715861:+	0.1	0.02	0.26	0.47	0.28	0.66	-0.37	14.7
Supercontig_12.4:2753026:2753981:-@Supercontig_12.4:2752939|2752964:2752118:-	0.2	0.08	0.35	0.56	0.39	0.73	-0.36	18.25
Supercontig_12.1:4860713:4860792:-@Supercontig_12.1:4860620|4860638:4859557:-	0.09	0.05	0.14	0.37	0.31	0.44	-0.28	1000000000000
Supercontig_12.5:4885606:4885861:-@Supercontig_12.5:4885045|4885331:4879246:-	0.36	0.26	0.46	0.61	0.48	0.75	-0.25	12.08
Supercontig_12.7:1892860:1894135:+@Supercontig_12.7:1894354|1894581:1894901:+	0.11	0.11	0.12	0.22	0.21	0.23	-0.11	1000000000000
Supercontig_12.7:1892860:1894135:+@Supercontig_12.7:1894426|1894581:1894901:+	0.13	0.12	0.13	0.23	0.23	0.24	-0.1	1000000000000
Supercontig_12.3:3878726:3878878:+@Supercontig_12.3:3878992|3879428:3879555:+	0.28	0.25	0.3	0.17	0.16	0.19	0.11	1000000000000
Supercontig_12.6:1647926:1648153:-@Supercontig_12.6:1647668|1647920:1647637:-	0.36	0.31	0.4	0.24	0.2	0.29	0.12	11.55
Supercontig_12.3:3878726:3878878:+@Supercontig_12.3:3878940|3879428:3879555:+	0.3	0.28	0.32	0.17	0.16	0.19	0.13	1000000000000
Supercontig_12.1:5990350:5990454:-@Supercontig_12.1:5989962|5990151:5989928:-	0.46	0.4	0.52	0.33	0.29	0.37	0.13	41.54
Supercontig_12.5:4693733:4694477:-@Supercontig_12.5:4693519|4693668:4693449:-	0.2	0.14	0.26	0.07	0.04	0.12	0.13	16.89
Supercontig_12.3:4171175:4171425:+@Supercontig_12.3:4171524|4171529:4171616:+	0.16	0.08	0.25	0.02	0.01	0.06	0.14	26.02
Supercontig_12.1:3670638:3670893:-@Supercontig_12.1:3670538|3670571:3670427:-	0.21	0.13	0.29	0.05	0.02	0.11	0.16	19.78
Supercontig_12.1:3268235:3268374:+@Supercontig_12.1:3268767|3268852:3269533:+	0.24	0.22	0.26	0.07	0.07	0.08	0.17	1000000000000
Supercontig_12.7:636740:637144:-@Supercontig_12.7:636584|636670:635306:-	0.44	0.36	0.53	0.26	0.2	0.32	0.18	73.33
Supercontig_12.5:5133223:5133901:+@Supercontig_12.5:5134336|5134395:5134798:+	0.89	0.79	0.98	0.61	0.51	0.7	0.28	3419.17
Supercontig_12.1:8356468:8356710:-@Supercontig_12.1:8356269|8356272:8355848:-	0.44	0.36	0.51	0.03	0	0.07	0.41	1000000000000
Supercontig_12.1:3268235:3268374:+@Supercontig_12.1:3268820|3268852:3269533:+	0.59	0.55	0.63	0.18	0.16	0.2	0.41	1000000000000
Supercontig_12.5:2547040:2547532:+@Supercontig_12.5:2547587|2547594:2549208:+	0.91	0.74	1	0.39	0.14	0.62	0.52	236.12
Supercontig_12.7:636740:637144:-@Supercontig_12.7:636658|636670:635306:-	0.9	0.73	0.99	0.21	0.06	0.5	0.69	59871.1

## Sheet: Supplemental Table 4
Supplemental Table 4
Events show exon skipping splicing changes in DD12/DD20
Event name	Isoform X/Total in DD12	95% lower confidence limit in DD12	95% higher confidence limit in DD12	Isoform X/Total in DD20	95% lower confidence limit in DD20	95% higher confidence limit in DD20	∆ Isoform X/Total in DD12 vs. DD20	Bayes factor
Supercontig_12.2:3016869:3017314:+@Supercontig_12.2:3017410:3017420:+@Supercontig_12.2:3017775:3017961:+	1	1	1	0.27	0.21	0.33	0.73	1000000000000
Supercontig_12.2:1612055:1612209:+@Supercontig_12.2:1612367:1612381:+@Supercontig_12.2:1612483:1612568:+	0.2	0.16	0.25	0.34	0.3	0.39	-0.14	6604.71
Supercontig_12.7:47166:47298:+@Supercontig_12.7:47394:47460:+@Supercontig_12.7:47572:48471:+	0.84	0.75	0.92	0.99	0.96	1	-0.15	65.94
Supercontig_12.7:2490608:2490983:+@Supercontig_12.7:2491125:2491196:+@Supercontig_12.7:2491252:2491339:+	0.89	0.87	0.9	1	1	1	-0.11	1000000000000
Supercontig_12.7:3978746:3978882:-@Supercontig_12.7:3978589:3978601:-@Supercontig_12.7:3978095:3978527:-	1	0.99	1	0.02	0	0.07	0.98	1000000000000
Supercontig_12.6:3987148:3987217:+@Supercontig_12.6:3987477:3987511:+@Supercontig_12.6:3987883:3988608:+	0.66	0.62	0.71	0.27	0.25	0.29	0.39	1000000000000
Supercontig_12.6:1128955:1129467:-@Supercontig_12.6:1128842:1128855:-@Supercontig_12.6:1128635:1128715:-	0.82	0.76	0.86	1	0.99	1	-0.18	1000000000000
Supercontig_12.6:1660945:1661247:-@Supercontig_12.6:1660308:1660505:-@Supercontig_12.6:1660009:1660220:-	0.62	0.6	0.63	0.28	0.27	0.29	0.34	1000000000000
Supercontig_12.4:3199322:3199426:-@Supercontig_12.4:3198966:3199061:-@Supercontig_12.4:3198776:3198896:-	0.71	0.58	0.83	0.98	0.93	1	-0.27	794633
Supercontig_12.3:3798632:3798673:+@Supercontig_12.3:3798739:3798800:+@Supercontig_12.3:3799053:3800054:+	0.96	0.9	1	0.6	0.55	0.64	0.36	1000000000000
Supercontig_12.3:3798572:3798673:+@Supercontig_12.3:3798736:3798800:+@Supercontig_12.3:3799053:3800054:+	0.99	0.97	1	0.83	0.78	0.88	0.16	1.70111e+11
Supercontig_12.1:4708054:4708349:-@Supercontig_12.1:4707747:4707978:-@Supercontig_12.1:4706182:4707471:-	0.36	0.28	0.45	0.18	0.12	0.25	0.18	35.16
Supercontig_12.1:3974420:3974681:-@Supercontig_12.1:3974278:3974360:-@Supercontig_12.1:3972683:3974203:-	0.86	0.79	0.91	0.99	0.97	1	-0.13	523536
Supercontig_12.1:3674708:3674910:+@Supercontig_12.1:3675302:3675352:+@Supercontig_12.1:3675642:3675715:+	0.76	0.74	0.77	0.94	0.93	0.94	-0.18	1000000000000
Supercontig_12.1:9626227:9626426:-@Supercontig_12.1:9626140:9626154:-@Supercontig_12.1:9625326:9626007:-	0.71	0.67	0.76	1	1	1	-0.29	1000000000000
Supercontig_12.1:2234832:2235079:-@Supercontig_12.1:2234693:2234709:-@Supercontig_12.1:2234389:2234594:-	0.97	0.89	1	0.71	0.67	0.74	0.26	10800453636
Supercontig_12.1:4874283:4874484:-@Supercontig_12.1:4874161:4874218:-@Supercontig_12.1:4872408:4874105:-	0.96	0.88	1	0.54	0.39	0.7	0.42	9.79923e+11
Supercontig_12.1:1165504:1165641:+@Supercontig_12.1:1165870:1165915:+@Supercontig_12.1:1165976:1166369:+	0.9	0.88	0.91	1	1	1	-0.1	1000000000000
Supercontig_12.1:1128813:1129113:-@Supercontig_12.1:1128577:1128595:-@Supercontig_12.1:1128190:1128485:-	1	1	1	0.19	0.17	0.22	0.81	1000000000000
Supercontig_12.5:4733406:4733639:-@Supercontig_12.5:4733132:4733277:-@Supercontig_12.5:4732563:4732964:-	0.64	0.52	0.77	0.94	0.85	0.99	-0.3	18029
Supercontig_12.5:4305804:4305989:+@Supercontig_12.5:4306206:4306251:+@Supercontig_12.5:4306414:4306531:+	0.79	0.77	0.8	1	1	1	-0.21	1000000000000
Supercontig_12.5:3019081:3019641:-@Supercontig_12.5:3018714:3018808:-@Supercontig_12.5:3017966:3018609:-	0.98	0.95	1	0.79	0.73	0.84	0.19	1000000000000

## Sheet: Supplemental Table 5
Supplemental Table 5
Events show intron retention splicing changes in DD12/DD20
Event name	Isoform X/Total in DD12	95% lower confidence limit in DD12	95% higher confidence limit in DD12	Isoform X/Total in DD20	95% lower confidence limit in DD20	95% higher confidence limit in DD20	∆ Isoform X/Total in DD12 vs. DD20	Bayes factor
Supercontig_12.2:939869:940085:+@Supercontig_12.2:940183:940254:+	0.69	0.66	0.71	0.54	0.51	0.57	0.15	1000000000000
Supercontig_12.2:3788709:3790627:+@Supercontig_12.2:3790708:3790742:+	0.81	0.68	0.92	0.98	0.95	1	-0.17	18.86
Supercontig_12.2:2614006:2614197:+@Supercontig_12.2:2614301:2617692:+	0.49	0.43	0.56	0.34	0.28	0.4	0.15	21.77
Supercontig_12.2:1611546:1611943:+@Supercontig_12.2:1612055:1612209:+	0.04	0.04	0.05	0.14	0.13	0.15	-0.1	1000000000000
Supercontig_12.2:4425433:4425512:+@Supercontig_12.2:4425855:4426858:+	0.54	0.51	0.57	0.43	0.4	0.46	0.11	1.6175e+07
Supercontig_12.2:4219234:4221822:+@Supercontig_12.2:4221888:4222288:+	0.32	0.24	0.41	0.67	0.47	0.9	-0.35	112.66
Supercontig_12.2:934015:934677:+@Supercontig_12.2:934756:936042:+	0.34	0.11	0.62	0.91	0.66	0.99	-0.57	17.25
Supercontig_12.2:2757191:2758350:-@Supercontig_12.2:2754560:2757048:-	0.4	0.34	0.48	0.63	0.56	0.69	-0.23	2581.8
Supercontig_12.2:3574926:3575411:+@Supercontig_12.2:3575485:3576841:+	0.96	0.84	0.99	0.71	0.56	0.83	0.25	19.06
Supercontig_12.2:2622741:2623740:-@Supercontig_12.2:2622230:2622572:-	0.66	0.62	0.7	0.49	0.45	0.53	0.17	791569
Supercontig_12.2:521494:521999:+@Supercontig_12.2:522599:522877:+	0.23	0.2	0.27	0.44	0.4	0.49	-0.21	1000000000000
Supercontig_12.2:2349489:2351044:+@Supercontig_12.2:2351124:2351342:+	0.05	0.02	0.09	0.21	0.14	0.31	-0.16	201.63
Supercontig_12.2:4316511:4316864:-@Supercontig_12.2:4315802:4316415:-	0.12	0.03	0.25	0.42	0.29	0.58	-0.3	11.31
Supercontig_12.2:2757191:2758350:-@Supercontig_12.2:2756092:2757048:-	0.38	0.32	0.45	0.59	0.52	0.66	-0.21	58705.4
Supercontig_12.2:830183:830622:-@Supercontig_12.2:829394:829708:-	0.73	0.69	0.77	0.52	0.49	0.55	0.21	1000000000000
Supercontig_12.2:305951:306310:+@Supercontig_12.2:306502:307168:+	0.28	0.22	0.35	0.15	0.1	0.2	0.13	14.06
Supercontig_12.2:3755222:3755782:-@Supercontig_12.2:3754809:3755134:-	0.52	0.4	0.64	0.09	0.03	0.18	0.43	8.75152e+08
Supercontig_12.2:985600:985620:-@Supercontig_12.2:985192:985422:-	0.31	0.19	0.44	0.05	0.03	0.08	0.26	38078.5
Supercontig_12.2:1898241:1898452:-@Supercontig_12.2:1897749:1898056:-	0.18	0.13	0.24	0.07	0.03	0.11	0.11	38.16
Supercontig_12.2:2765772:2766097:+@Supercontig_12.2:2766156:2766543:+	0.73	0.54	0.87	0.3	0.18	0.46	0.43	94.07
Supercontig_12.2:4310928:4311132:+@Supercontig_12.2:4311197:4311509:+	0.92	0.86	0.96	0.69	0.55	0.82	0.23	42.58
Supercontig_12.2:4397548:4397796:-@Supercontig_12.2:4396477:4397397:-	0.09	0.07	0.12	0.19	0.14	0.25	-0.1	14.14
Supercontig_12.2:1062875:1064160:-@Supercontig_12.2:1062626:1062815:-	0.41	0.38	0.45	0.31	0.27	0.34	0.1	241.51
Supercontig_12.2:832389:832528:+@Supercontig_12.2:832630:833142:+	0.41	0.35	0.49	0.57	0.51	0.62	-0.16	12.42
Supercontig_12.2:2586629:2586641:-@Supercontig_12.2:2585927:2586529:-	0.27	0.22	0.32	0.1	0.07	0.12	0.17	1000000000000
Supercontig_12.2:2445972:2446001:-@Supercontig_12.2:2445669:2445850:-	0.03	0.02	0.05	0.3	0.24	0.37	-0.27	1000000000000
Supercontig_12.2:2370159:2370221:+@Supercontig_12.2:2370426:2371818:+	0.21	0.16	0.26	0.39	0.32	0.47	-0.18	10624.8
Supercontig_12.2:866377:866535:+@Supercontig_12.2:867008:867956:+	0.49	0.43	0.55	0.32	0.25	0.39	0.17	55.82
Supercontig_12.2:2481215:2481301:+@Supercontig_12.2:2481444:2481537:+	0.09	0.09	0.09	0.19	0.18	0.2	-0.1	1000000000000
Supercontig_12.2:2032917:2033564:+@Supercontig_12.2:2033682:2034902:+	0.89	0.71	1	0.55	0.43	0.69	0.34	55.02
Supercontig_12.7:3131640:3132351:+@Supercontig_12.7:3133007:3136464:+	0.99	0.96	1	0.42	0.36	0.48	0.57	1000000000000
Supercontig_12.7:1515139:1515397:-@Supercontig_12.7:1513648:1515035:-	0.23	0.12	0.39	0.84	0.57	0.98	-0.61	239.93
Supercontig_12.7:1766540:1767138:-@Supercontig_12.7:1766439:1766457:-	0.75	0.73	0.76	0.89	0.88	0.9	-0.14	1000000000000
Supercontig_12.7:3189797:3193196:+@Supercontig_12.7:3193261:3195483:+	0.17	0.09	0.28	0.02	0	0.05	0.15	35.69
Supercontig_12.7:1766540:1766702:-@Supercontig_12.7:1766439:1766464:-	0.85	0.84	0.86	0.96	0.95	0.96	-0.11	1000000000000
Supercontig_12.7:1949321:1949338:-@Supercontig_12.7:1948175:1949260:-	0.09	0.02	0.2	0.72	0.51	0.95	-0.63	1000000000000
Supercontig_12.7:2599586:2599745:-@Supercontig_12.7:2598658:2599411:-	0.19	0.14	0.26	0.06	0.04	0.1	0.13	1514.29
Supercontig_12.7:3297771:3298087:-@Supercontig_12.7:3297536:3297671:-	0.11	0.06	0.17	0.01	0	0.03	0.1	430.58
Supercontig_12.7:998825:998921:+@Supercontig_12.7:998998:999143:+	0.6	0.58	0.61	0.35	0.33	0.37	0.25	1000000000000
Supercontig_12.7:2907757:2907774:+@Supercontig_12.7:2907968:2908134:+	0.16	0.14	0.18	0.05	0.04	0.07	0.11	1000000000000
Supercontig_12.7:2987906:2987992:+@Supercontig_12.7:2988056:2990373:+	0.09	0.05	0.13	0.22	0.14	0.31	-0.13	10.13
Supercontig_12.7:3170912:3171193:+@Supercontig_12.7:3171569:3171653:+	0.82	0.6	0.97	0.39	0.25	0.54	0.43	24.25
Supercontig_12.7:528489:529124:-@Supercontig_12.7:525789:528408:-	0.98	0.94	1	0.82	0.73	0.9	0.16	467.13
Supercontig_12.7:805344:805814:+@Supercontig_12.7:805903:807098:+	0.45	0.26	0.67	0.88	0.68	0.97	-0.43	39.88
Supercontig_12.7:636740:637144:-@Supercontig_12.7:635306:636658:-	0.24	0.15	0.34	0.07	0.03	0.11	0.17	20.49
Supercontig_12.7:2659658:2661871:-@Supercontig_12.7:2659104:2659551:-	0.29	0.26	0.32	0.39	0.36	0.42	-0.1	37185.7
Supercontig_12.7:6447:6962:-@Supercontig_12.7:6269:6373:-	0.28	0.11	0.5	0.89	0.69	0.99	-0.61	128.62
Supercontig_12.7:2601058:2601718:-@Supercontig_12.7:2600111:2601000:-	0.4	0.28	0.54	0.88	0.7	0.98	-0.48	338.7
Supercontig_12.7:3979780:3980064:-@Supercontig_12.7:3979181:3979687:-	0.17	0.13	0.22	0.03	0.02	0.06	0.14	1000000000000
Supercontig_12.7:2599586:2599745:-@Supercontig_12.7:2598638:2599411:-	0.19	0.13	0.26	0.07	0.04	0.1	0.12	178.23
Supercontig_12.7:529187:529607:-@Supercontig_12.7:525789:529124:-	0.23	0.13	0.34	0.63	0.48	0.78	-0.4	2627.52
Supercontig_12.7:266983:267312:-@Supercontig_12.7:266346:266760:-	0.94	0.87	0.99	0.56	0.46	0.66	0.38	1000000000000
Supercontig_12.7:2753310:2754088:+@Supercontig_12.7:2754248:2755694:+	0.25	0.19	0.31	0.13	0.09	0.17	0.12	13.11
Supercontig_12.7:15221:15244:+@Supercontig_12.7:15421:16606:+	0.24	0.16	0.34	0.04	0.01	0.09	0.2	234
Supercontig_12.7:2523736:2523869:-@Supercontig_12.7:2522850:2523118:-	0.63	0.6	0.66	0.37	0.35	0.39	0.26	1000000000000
Supercontig_12.7:3170912:3171189:+@Supercontig_12.7:3171569:3171653:+	0.82	0.59	0.99	0.36	0.24	0.5	0.46	126.04
Supercontig_12.7:3131640:3132351:+@Supercontig_12.7:3132850:3136464:+	0.97	0.94	0.99	0.52	0.44	0.6	0.45	1000000000000
Supercontig_12.7:3131640:3132351:+@Supercontig_12.7:3133007:3133147:+	0.99	0.97	1	0.56	0.5	0.62	0.43	1000000000000
Supercontig_12.7:3979780:3980031:-@Supercontig_12.7:3979181:3979687:-	0.16	0.12	0.22	0.03	0.02	0.06	0.13	88815.1
Supercontig_12.7:3238603:3238960:-@Supercontig_12.7:3235743:3238492:-	0.97	0.9	1	0.52	0.42	0.62	0.45	1000000000000
Supercontig_12.7:1982787:1983114:+@Supercontig_12.7:1983180:1983313:+	0.13	0.11	0.15	0.02	0.01	0.03	0.11	1000000000000
Supercontig_12.7:3040583:3040969:+@Supercontig_12.7:3041187:3041306:+	0.61	0.59	0.62	0.28	0.27	0.29	0.33	1000000000000
Supercontig_12.7:3602954:3603630:+@Supercontig_12.7:3603703:3605001:+	0.35	0.28	0.44	0.13	0.08	0.18	0.22	3.0508e+07
Supercontig_12.7:4065594:4067157:+@Supercontig_12.7:4067253:4067740:+	0.37	0.24	0.52	0.95	0.83	1	-0.58	1000000000000
Supercontig_12.7:3855779:3856534:+@Supercontig_12.7:3856586:3857378:+	0.15	0.07	0.24	0.02	0.01	0.05	0.13	11.27
Supercontig_12.7:2582572:2583450:-@Supercontig_12.7:2582301:2582502:-	0.58	0.51	0.64	0.33	0.27	0.39	0.25	1.11212e+10
Supercontig_12.7:4065433:4065660:-@Supercontig_12.7:4063145:4065251:-	0.63	0.47	0.79	0.24	0.1	0.45	0.39	17.61
Supercontig_12.7:3121921:3122114:+@Supercontig_12.7:3122175:3124264:+	0.99	0.97	1	0.81	0.76	0.85	0.18	1000000000000
Supercontig_12.7:976362:976749:+@Supercontig_12.7:976827:977157:+	0.91	0.71	1	0.27	0.14	0.45	0.64	1000000000000
Supercontig_12.7:969179:969310:+@Supercontig_12.7:969380:970560:+	0.03	0	0.07	0.65	0.28	0.97	-0.62	261.18
Supercontig_12.7:1766540:1766665:-@Supercontig_12.7:1765151:1766464:-	0.07	0.07	0.08	0.25	0.25	0.26	-0.18	1000000000000
Supercontig_12.7:2115224:2117593:-@Supercontig_12.7:2114545:2115166:-	0.59	0.38	0.78	0.93	0.8	1	-0.34	111.32
Supercontig_12.7:14946:15282:+@Supercontig_12.7:15421:16606:+	0.26	0.17	0.37	0.08	0.03	0.14	0.18	32.15
Supercontig_12.7:975705:976298:+@Supercontig_12.7:976362:976749:+	0.93	0.8	0.99	0.19	0.11	0.28	0.74	1000000000000
Supercontig_12.7:3865494:3865505:+@Supercontig_12.7:3865571:3865734:+	0.01	0	0.03	0.21	0.17	0.25	-0.2	1000000000000
Supercontig_12.7:1581965:1583172:-@Supercontig_12.7:1580889:1581900:-	0.12	0.05	0.19	0.01	0	0.04	0.11	11.81
Supercontig_12.7:2652696:2653646:+@Supercontig_12.7:2653820:2654724:+	0.16	0.11	0.22	0.05	0.03	0.09	0.11	14.79
Supercontig_12.7:2075065:2075511:+@Supercontig_12.7:2075579:2075610:+	0.19	0.06	0.42	0.74	0.47	0.99	-0.55	29.57
Supercontig_12.7:2060478:2060845:+@Supercontig_12.7:2060905:2062381:+	0.47	0.42	0.52	0.31	0.26	0.37	0.16	331.93
Supercontig_12.7:3904150:3905928:-@Supercontig_12.7:3903454:3904051:-	0.24	0.14	0.36	0.6	0.46	0.75	-0.36	1065.72
Supercontig_12.7:2579873:2580222:+@Supercontig_12.7:2580350:2580817:+	0.5	0.34	0.66	0.18	0.08	0.32	0.32	31.57
Supercontig_12.7:3595548:3595695:+@Supercontig_12.7:3595751:3596222:+	0.21	0.16	0.27	0.38	0.31	0.45	-0.17	107.65
Supercontig_12.6:1128842:1128855:-@Supercontig_12.6:1128635:1128715:-	0.13	0.09	0.17	0.02	0.01	0.03	0.11	1.07894e+10
Supercontig_12.6:2372533:2372895:+@Supercontig_12.6:2372948:2373145:+	0.9	0.67	1	0.44	0.34	0.54	0.46	157.66
Supercontig_12.6:2245319:2246019:+@Supercontig_12.6:2246087:2246658:+	0.11	0.09	0.13	0.25	0.22	0.29	-0.14	1000000000000
Supercontig_12.6:3377382:3378121:-@Supercontig_12.6:3377017:3377285:-	0.42	0.33	0.51	0.7	0.56	0.85	-0.28	65.49
Supercontig_12.6:1169304:1169716:-@Supercontig_12.6:1168246:1169234:-	0.12	0.05	0.2	0.72	0.45	0.97	-0.6	784788
Supercontig_12.6:803031:806773:+@Supercontig_12.6:806965:808852:+	0.29	0.25	0.33	0.49	0.45	0.53	-0.2	1000000000000
Supercontig_12.6:2027884:2028213:-@Supercontig_12.6:2027703:2027810:-	0.49	0.45	0.53	0.32	0.29	0.36	0.17	1000000000000
Supercontig_12.6:3987148:3987217:+@Supercontig_12.6:3987477:3987511:+	0.37	0.34	0.39	0.48	0.46	0.51	-0.11	1000000000000
Supercontig_12.6:2005725:2005844:-@Supercontig_12.6:2003064:2005268:-	0.45	0.36	0.54	0.23	0.18	0.29	0.22	92.61
Supercontig_12.6:1881420:1881534:+@Supercontig_12.6:1881621:1882111:+	0.49	0.38	0.61	0.25	0.17	0.36	0.24	40.8
Supercontig_12.6:2027703:2028213:-@Supercontig_12.6:2027598:2027636:-	0.04	0.03	0.06	0.16	0.13	0.19	-0.12	1000000000000
Supercontig_12.6:3362030:3363669:+@Supercontig_12.6:3364002:3364815:+	0.66	0.62	0.71	0.45	0.38	0.52	0.21	1.03122e+09
Supercontig_12.6:1124166:1125151:+@Supercontig_12.6:1125249:1126245:+	0.72	0.67	0.77	0.48	0.39	0.56	0.24	4.20689e+06
Supercontig_12.6:10128:10292:+@Supercontig_12.6:10580:10680:+	0.88	0.67	0.98	0.49	0.27	0.71	0.39	16.02
Supercontig_12.6:2027703:2027810:-@Supercontig_12.6:2027598:2027636:-	0.04	0.03	0.06	0.15	0.12	0.18	-0.11	1000000000000
Supercontig_12.6:1535706:1535803:+@Supercontig_12.6:1535872:1535932:+	0	0	0.01	0.11	0.1	0.11	-0.11	1000000000000
Supercontig_12.6:2027598:2027636:-@Supercontig_12.6:2027415:2027489:-	0.16	0.12	0.21	0.32	0.26	0.38	-0.16	203.87
Supercontig_12.6:1908826:1908881:+@Supercontig_12.6:1909190:1909299:+	0.37	0.32	0.41	0.54	0.5	0.58	-0.17	1000000000000
Supercontig_12.6:1207925:1208173:-@Supercontig_12.6:1207216:1207841:-	0.94	0.84	0.99	0.66	0.5	0.81	0.28	14.64
Supercontig_12.6:947802:947884:-@Supercontig_12.6:947271:947740:-	0.83	0.81	0.86	0.7	0.66	0.73	0.13	1000000000000
Supercontig_12.4:5524593:5524962:-@Supercontig_12.4:5524343:5524377:-	0.54	0.49	0.58	0.36	0.33	0.39	0.18	1000000000000
Supercontig_12.4:5766874:5767760:-@Supercontig_12.4:5765356:5766768:-	0.14	0.08	0.22	0.02	0.01	0.05	0.12	56.7
Supercontig_12.4:2499630:2499638:+@Supercontig_12.4:2499759:2499896:+	0.92	0.86	0.96	0.7	0.66	0.75	0.22	1000000000000
Supercontig_12.4:1626404:1626569:+@Supercontig_12.4:1626699:1627923:+	0.1	0.09	0.12	0.24	0.2	0.27	-0.14	1000000000000
Supercontig_12.4:3282038:3282839:-@Supercontig_12.4:3281480:3281966:-	0.05	0.02	0.09	0.17	0.12	0.22	-0.12	50.67
Supercontig_12.4:3204027:3204175:-@Supercontig_12.4:3203643:3203955:-	0.25	0.1	0.42	0.72	0.44	0.92	-0.47	45.69
Supercontig_12.4:2647672:2648133:+@Supercontig_12.4:2648250:2648265:+	0.01	0	0.02	0.19	0.15	0.23	-0.18	1000000000000
Supercontig_12.4:3992141:3992474:+@Supercontig_12.4:3992611:3993632:+	0.07	0.04	0.11	0.19	0.14	0.25	-0.12	14.48
Supercontig_12.4:780271:780491:-@Supercontig_12.4:778828:780213:-	0.11	0.08	0.14	0.34	0.29	0.39	-0.23	1000000000000
Supercontig_12.4:1969753:1969979:+@Supercontig_12.4:1970341:1972318:+	0.13	0.11	0.15	0.23	0.19	0.27	-0.1	11086
Supercontig_12.4:1678950:1679807:+@Supercontig_12.4:1679890:1680127:+	0.41	0.22	0.62	0.05	0	0.15	0.36	4252.28
Supercontig_12.4:4799530:4800058:-@Supercontig_12.4:4798729:4799404:-	0.42	0.38	0.47	0.26	0.23	0.3	0.16	1000000000000
Supercontig_12.4:2453004:2455279:-@Supercontig_12.4:2452321:2452944:-	0.34	0.15	0.6	0.03	0	0.11	0.31	18.68
Supercontig_12.4:1317357:1317576:-@Supercontig_12.4:1316894:1317291:-	0.41	0.33	0.5	0.25	0.19	0.3	0.16	16.83
Supercontig_12.4:4428869:4429129:-@Supercontig_12.4:4428013:4428679:-	0.7	0.66	0.74	0.6	0.57	0.64	0.1	23.62
Supercontig_12.4:2647905:2648133:+@Supercontig_12.4:2648250:2648265:+	0	0	0.01	0.11	0.09	0.14	-0.11	1000000000000
Supercontig_12.4:2323156:2324003:+@Supercontig_12.4:2324078:2324672:+	0.04	0.01	0.08	0.22	0.14	0.3	-0.18	40852.9
Supercontig_12.4:3190297:3190447:-@Supercontig_12.4:3189039:3190180:-	0.13	0.1	0.17	0.03	0.01	0.06	0.1	6964.22
Supercontig_12.4:3574180:3574334:+@Supercontig_12.4:3574399:3574586:+	0.54	0.27	0.78	0.1	0	0.32	0.44	28.43
Supercontig_12.4:4396993:4397161:+@Supercontig_12.4:4397223:4397302:+	0.33	0.21	0.46	0.69	0.54	0.81	-0.36	353.2
Supercontig_12.4:64616:64749:+@Supercontig_12.4:64930:66942:+	0.49	0.4	0.59	0.95	0.88	0.99	-0.46	1000000000000
Supercontig_12.4:1614492:1614736:+@Supercontig_12.4:1614818:1615792:+	0.1	0.05	0.16	0.27	0.2	0.35	-0.17	46.44
Supercontig_12.4:2271367:2271628:-@Supercontig_12.4:2270228:2271226:-	0.37	0.3	0.43	0.13	0.09	0.18	0.24	1000000000000
Supercontig_12.4:6446:7605:+@Supercontig_12.4:7667:8374:+	0.48	0.28	0.68	0.91	0.73	0.99	-0.43	62.54
Supercontig_12.4:2768116:2768213:-@Supercontig_12.4:2767090:2767854:-	0.6	0.53	0.67	0.93	0.89	0.96	-0.33	1000000000000
Supercontig_12.4:5372890:5372908:-@Supercontig_12.4:5372727:5372820:-	0.07	0.04	0.1	0.79	0.63	0.94	-0.72	1000000000000
Supercontig_12.4:5405379:5405926:-@Supercontig_12.4:5404879:5405041:-	0.21	0.19	0.23	0.41	0.38	0.44	-0.2	1000000000000
Supercontig_12.4:71005:71152:+@Supercontig_12.4:71256:72141:+	0.16	0.1	0.22	0.36	0.26	0.47	-0.2	20.42
Supercontig_12.4:85773:86267:+@Supercontig_12.4:86398:87019:+	0.04	0.01	0.08	0.24	0.17	0.33	-0.2	7.9766e+07
Supercontig_12.4:2199877:2200104:+@Supercontig_12.4:2200800:2202447:+	0.43	0.4	0.47	0.55	0.51	0.6	-0.12	414.55
Supercontig_12.4:1268251:1268643:+@Supercontig_12.4:1268729:1270051:+	0.97	0.88	1	0.71	0.58	0.85	0.26	33.89
Supercontig_12.4:1206280:1206486:+@Supercontig_12.4:1206557:1206756:+	0.76	0.37	0.97	0.11	0.04	0.23	0.65	145.55
Supercontig_12.4:4784136:4784859:+@Supercontig_12.4:4785023:4785261:+	0.17	0.15	0.19	0.28	0.26	0.3	-0.11	1000000000000
Supercontig_12.4:1368625:1369181:+@Supercontig_12.4:1369245:1370074:+	0.71	0.68	0.75	0.53	0.48	0.58	0.18	1000000000000
Supercontig_12.4:1368416:1368506:+@Supercontig_12.4:1368625:1369181:+	0.43	0.39	0.48	0.18	0.15	0.22	0.25	1000000000000
Supercontig_12.4:4529757:4529822:+@Supercontig_12.4:4529886:4532017:+	0.1	0.07	0.13	0.2	0.16	0.23	-0.1	514.27
Supercontig_12.4:5784136:5785813:-@Supercontig_12.4:5783953:5784018:-	0.52	0.42	0.61	0.74	0.64	0.83	-0.22	13.18
Supercontig_12.4:4475244:4476652:-@Supercontig_12.4:4475061:4475182:-	0.75	0.62	0.88	0.98	0.95	1	-0.23	1446.54
Supercontig_12.4:3992141:3992474:+@Supercontig_12.4:3992611:3993627:+	0.07	0.04	0.12	0.19	0.14	0.24	-0.12	16.97
Supercontig_12.4:2777959:2778184:+@Supercontig_12.4:2778342:2778987:+	0.47	0.35	0.6	0.21	0.15	0.29	0.26	58.78
Supercontig_12.4:2271367:2271503:-@Supercontig_12.4:2270228:2271209:-	0.5	0.45	0.56	0.31	0.25	0.37	0.19	7668.97
Supercontig_12.4:3324019:3324175:-@Supercontig_12.4:3323405:3323893:-	0.49	0.42	0.56	0.31	0.25	0.38	0.18	22.62
Supercontig_12.3:2804504:2805451:+@Supercontig_12.3:2805529:2807804:+	0.18	0.08	0.31	0.02	0.01	0.05	0.16	23.02
Supercontig_12.3:3208258:3208366:-@Supercontig_12.3:3207241:3208021:-	0.51	0.39	0.65	0.79	0.7	0.86	-0.28	66.74
Supercontig_12.3:3970587:3970694:-@Supercontig_12.3:3969151:3970535:-	0.65	0.56	0.73	0.44	0.36	0.53	0.21	22.35
Supercontig_12.3:3121833:3122543:+@Supercontig_12.3:3123030:3125644:+	0.23	0.17	0.32	0.06	0.03	0.1	0.17	1.48961e+06
Supercontig_12.3:1097420:1097438:-@Supercontig_12.3:1096584:1097309:-	0.14	0.1	0.2	0.4	0.3	0.51	-0.26	304278
Supercontig_12.3:2666331:2666503:+@Supercontig_12.3:2667042:2667205:+	0.58	0.55	0.62	0.68	0.65	0.71	-0.1	53.81
Supercontig_12.3:290697:290825:-@Supercontig_12.3:289048:290618:-	0.3	0.1	0.62	0.02	0.01	0.06	0.28	10.78
Supercontig_12.3:1957749:1957982:+@Supercontig_12.3:1958134:1958427:+	0.34	0.31	0.37	0.48	0.45	0.51	-0.14	1000000000000
Supercontig_12.3:3740936:3741197:-@Supercontig_12.3:3740371:3740865:-	0.18	0.12	0.26	0.06	0.03	0.1	0.12	46.01
Supercontig_12.3:1673482:1674082:+@Supercontig_12.3:1674150:1674542:+	0.26	0.17	0.36	0.1	0.06	0.15	0.16	13.63
Supercontig_12.3:2343204:2343258:-@Supercontig_12.3:2342227:2342988:-	0.08	0.06	0.11	0.19	0.15	0.23	-0.11	1.77992e+08
Supercontig_12.3:3207241:3208206:-@Supercontig_12.3:3206494:3207139:-	0.67	0.52	0.81	0.2	0.12	0.29	0.47	5.25917e+09
Supercontig_12.3:3874080:3874762:+@Supercontig_12.3:3875156:3878093:+	0.52	0.46	0.6	0.34	0.28	0.4	0.18	119.81
Supercontig_12.3:3748454:3748591:+@Supercontig_12.3:3748795:3750772:+	0.37	0.34	0.4	0.23	0.2	0.25	0.14	1000000000000
Supercontig_12.3:3375532:3376003:+@Supercontig_12.3:3376099:3377178:+	0.51	0.33	0.68	0.13	0.03	0.3	0.38	15.36
Supercontig_12.3:1992848:1992868:-@Supercontig_12.3:1992537:1992608:-	0.44	0.35	0.53	0.86	0.79	0.92	-0.42	1000000000000
Supercontig_12.3:3968234:3968347:-@Supercontig_12.3:3968049:3968160:-	0.54	0.44	0.63	0.75	0.69	0.81	-0.21	799.48
Supercontig_12.3:4403315:4404068:+@Supercontig_12.3:4404134:4404960:+	0.23	0.16	0.31	0.03	0.01	0.06	0.2	4.65072e+10
Supercontig_12.3:3878726:3878878:+@Supercontig_12.3:3879428:3879555:+	0.31	0.29	0.33	0.19	0.17	0.2	0.12	1000000000000
Supercontig_12.3:1692249:1692385:+@Supercontig_12.3:1692513:1693201:+	0.9	0.75	1	0.55	0.41	0.69	0.35	64.75
Supercontig_12.3:3968234:3968294:-@Supercontig_12.3:3968049:3968160:-	0.39	0.29	0.5	0.62	0.52	0.7	-0.23	14.52
Supercontig_12.3:1470954:1471307:+@Supercontig_12.3:1471457:1472531:+	0.62	0.52	0.72	0.32	0.21	0.46	0.3	121.07
Supercontig_12.3:2506089:2508881:-@Supercontig_12.3:2505040:2505710:-	0.32	0.25	0.41	0.12	0.08	0.17	0.2	451633
Supercontig_12.3:1951728:1951870:-@Supercontig_12.3:1951422:1951636:-	0.78	0.49	0.97	0.16	0.03	0.38	0.62	507.62
Supercontig_12.3:1317422:1317964:-@Supercontig_12.3:1317246:1317355:-	0.78	0.52	0.99	0.17	0.01	0.55	0.61	20.96
Supercontig_12.3:1958134:1958427:-@Supercontig_12.3:1957749:1957953:-	0.23	0.21	0.25	0.37	0.35	0.4	-0.14	1000000000000
Supercontig_12.3:3207241:3208021:-@Supercontig_12.3:3206494:3207139:-	0.67	0.53	0.81	0.21	0.13	0.3	0.46	2.75556e+11
Supercontig_12.3:4157673:4157784:-@Supercontig_12.3:4156465:4157580:-	0.73	0.68	0.79	0.56	0.5	0.63	0.17	1825.26
Supercontig_12.3:495590:496741:+@Supercontig_12.3:498242:498380:+	0.64	0.61	0.68	0.46	0.43	0.5	0.18	1000000000000
Supercontig_12.3:81974:83193:+@Supercontig_12.3:83325:83774:+	0.55	0.42	0.68	0.95	0.87	0.99	-0.4	1.18732e+07
Supercontig_12.3:2343838:2344025:-@Supercontig_12.3:2343508:2343603:-	0.89	0.84	0.93	0.67	0.6	0.74	0.22	5.20945e+09
Supercontig_12.3:2666336:2666503:+@Supercontig_12.3:2667055:2667205:+	0.58	0.55	0.62	0.71	0.68	0.74	-0.13	1.57502e+07
Supercontig_12.3:4068254:4069847:+@Supercontig_12.3:4070085:4071377:+	0.88	0.83	0.93	0.66	0.58	0.74	0.22	2285.04
Supercontig_12.3:178953:179879:+@Supercontig_12.3:179957:180427:+	0.53	0.37	0.68	0.93	0.77	0.99	-0.4	66.15
Supercontig_12.3:3968697:3969033:-@Supercontig_12.3:3968234:3968294:-	0.55	0.5	0.61	0.74	0.7	0.79	-0.19	1.10582e+08
Supercontig_12.3:1864008:1865251:+@Supercontig_12.3:1865407:1865828:+	0.71	0.63	0.79	0.49	0.42	0.56	0.22	360.48
Supercontig_12.3:2861439:2861731:+@Supercontig_12.3:2861788:2862371:+	0.11	0.06	0.17	0.32	0.25	0.41	-0.21	596002
Supercontig_12.3:1097420:1097438:-@Supercontig_12.3:1097027:1097309:-	0.1	0.07	0.13	0.28	0.21	0.35	-0.18	3.31887e+07
Supercontig_12.3:4468405:4468540:+@Supercontig_12.3:4468647:4469161:+	0.6	0.48	0.71	0.23	0.12	0.34	0.37	11735.8
Supercontig_12.3:3672803:3673120:-@Supercontig_12.3:3671494:3672728:-	0.77	0.69	0.84	0.98	0.92	1	-0.21	122185
Supercontig_12.1:6887780:6888370:+@Supercontig_12.1:6888425:6888894:+	0.07	0.05	0.09	0.31	0.2	0.43	-0.24	4.92874e+06
Supercontig_12.1:5310066:5310089:-@Supercontig_12.1:5308490:5310000:-	0.26	0.17	0.37	0.08	0.05	0.13	0.18	59.69
Supercontig_12.1:4400645:4401517:-@Supercontig_12.1:4398398:4400584:-	0.72	0.68	0.76	0.6	0.55	0.65	0.12	14.07
Supercontig_12.1:6468613:6468714:-@Supercontig_12.1:6467198:6468500:-	0.63	0.42	0.96	0.31	0.23	0.41	0.32	11.09
Supercontig_12.1:350926:352922:-@Supercontig_12.1:350032:350778:-	0.35	0.25	0.46	0.16	0.1	0.22	0.19	26.92
Supercontig_12.1:631764:631804:-@Supercontig_12.1:631577:631626:-	0.85	0.63	0.99	0.36	0.15	0.62	0.49	28.36
Supercontig_12.1:5386025:5386663:-@Supercontig_12.1:5384565:5385959:-	0.15	0.08	0.25	0.52	0.32	0.72	-0.37	186.83
Supercontig_12.1:3169216:3169629:-@Supercontig_12.1:3168154:3168754:-	0.22	0.16	0.28	0.07	0.03	0.12	0.15	40.23
Supercontig_12.1:6754343:6755208:-@Supercontig_12.1:6752091:6754291:-	0.26	0.19	0.34	0.45	0.37	0.53	-0.19	50.43
Supercontig_12.1:4143347:4145218:-@Supercontig_12.1:4142926:4143262:-	0.59	0.4	0.79	0.17	0.05	0.35	0.42	58.88
Supercontig_12.1:4920930:4921074:-@Supercontig_12.1:4920571:4920876:-	0.63	0.38	0.86	0.09	0.01	0.24	0.54	80.32
Supercontig_12.1:7563346:7563461:+@Supercontig_12.1:7563609:7563776:+	0.39	0.37	0.42	0.26	0.24	0.28	0.13	1000000000000
Supercontig_12.1:2459192:2459449:+@Supercontig_12.1:2459513:2459632:+	0.68	0.64	0.71	0.53	0.49	0.57	0.15	4.07536e+06
Supercontig_12.1:5512723:5512901:-@Supercontig_12.1:5512232:5512662:-	0.21	0.09	0.36	0.84	0.57	0.99	-0.63	9486.38
Supercontig_12.1:6669606:6669760:+@Supercontig_12.1:6669835:6669966:+	0.99	0.97	1	0.87	0.83	0.9	0.12	1000000000000
Supercontig_12.1:2102734:2103162:+@Supercontig_12.1:2103251:2104394:+	0.41	0.36	0.46	0.17	0.12	0.21	0.24	1000000000000
Supercontig_12.1:7319071:7319875:-@Supercontig_12.1:7318856:7319012:-	0.55	0.43	0.7	0.98	0.88	1	-0.43	1000000000000
Supercontig_12.1:5410973:5412580:-@Supercontig_12.1:5410375:5410876:-	0.09	0.07	0.11	0.19	0.17	0.22	-0.1	1000000000000
Supercontig_12.1:2355509:2355562:-@Supercontig_12.1:2355056:2355369:-	0.14	0.06	0.26	0.88	0.69	1	-0.74	1000000000000
Supercontig_12.1:7874969:7875019:-@Supercontig_12.1:7874854:7874903:-	0.77	0.67	0.86	0.37	0.28	0.49	0.4	1.58757e+10
Supercontig_12.1:6553181:6553267:+@Supercontig_12.1:6553346:6553409:+	0.49	0.4	0.57	0.71	0.61	0.79	-0.22	46.15
Supercontig_12.1:1023068:1023147:-@Supercontig_12.1:1022976:1022998:-	0.07	0.01	0.22	0.51	0.27	0.78	-0.44	22.52
Supercontig_12.1:4620411:4620848:-@Supercontig_12.1:4615114:4620341:-	0.02	0	0.06	0.16	0.08	0.25	-0.14	147.36
Supercontig_12.1:3207704:3207715:+@Supercontig_12.1:3207779:3207947:+	0.22	0.1	0.39	0.56	0.39	0.79	-0.34	10.48
Supercontig_12.1:4527705:4528659:+@Supercontig_12.1:4528718:4528831:+	0.16	0.03	0.38	0.66	0.43	0.88	-0.5	38.21
Supercontig_12.1:539196:539788:+@Supercontig_12.1:540012:540343:+	0.37	0.34	0.4	0.21	0.19	0.23	0.16	1000000000000
Supercontig_12.1:2808952:2809176:+@Supercontig_12.1:2809332:2810355:+	0.22	0.11	0.37	0.54	0.38	0.72	-0.32	20.41
Supercontig_12.1:5190522:5190713:+@Supercontig_12.1:5190912:5191382:+	0.27	0.21	0.33	0.49	0.41	0.56	-0.22	16473.1
Supercontig_12.1:4121814:4122188:+@Supercontig_12.1:4122259:4122293:+	0.98	0.94	1	0.55	0.45	0.64	0.43	1000000000000
Supercontig_12.1:1660989:1661150:+@Supercontig_12.1:1661209:1661793:+	0.07	0.05	0.1	0.23	0.19	0.27	-0.16	1000000000000
Supercontig_12.1:4497370:4497570:-@Supercontig_12.1:4497183:4497308:-	0.04	0.02	0.08	0.16	0.1	0.23	-0.12	24.09
Supercontig_12.1:7782535:7782607:-@Supercontig_12.1:7782116:7782468:-	0.2	0.14	0.27	0.53	0.43	0.64	-0.33	1000000000000
Supercontig_12.1:6562125:6562857:+@Supercontig_12.1:6562972:6563449:+	0.14	0.11	0.17	0.02	0.01	0.03	0.12	1000000000000
Supercontig_12.1:5245308:5245755:+@Supercontig_12.1:5245926:5246110:+	0.2	0.15	0.27	0.01	0	0.02	0.19	1000000000000
Supercontig_12.1:7318088:7318304:+@Supercontig_12.1:7318625:7319761:+	0.41	0.34	0.48	0.19	0.13	0.26	0.22	2733.39
Supercontig_12.1:4136249:4136435:-@Supercontig_12.1:4135754:4136030:-	0.49	0.46	0.52	0.61	0.59	0.64	-0.12	5.61205e+09
Supercontig_12.1:8714632:8714734:-@Supercontig_12.1:8714449:8714550:-	0.89	0.67	0.99	0.35	0.1	0.66	0.54	27.06
Supercontig_12.1:2609000:2609315:+@Supercontig_12.1:2609376:2610704:+	0.82	0.54	0.99	0.06	0.01	0.17	0.76	4.9051e+11
Supercontig_12.1:5571440:5571489:-@Supercontig_12.1:5565797:5571163:-	0.19	0.15	0.24	0.07	0.05	0.1	0.12	2.8339e+06
Supercontig_12.1:171729:171825:-@Supercontig_12.1:171442:171670:-	0.07	0.04	0.12	0.26	0.19	0.35	-0.19	1.77465e+06
Supercontig_12.1:2898039:2899075:+@Supercontig_12.1:2899317:2899582:+	0.37	0.29	0.44	0.17	0.11	0.22	0.2	6132.26
Supercontig_12.1:6687487:6687600:-@Supercontig_12.1:6686820:6687251:-	0.59	0.52	0.66	0.41	0.36	0.45	0.18	4904.83
Supercontig_12.1:2359053:2359582:+@Supercontig_12.1:2359642:2359757:+	0.79	0.56	0.98	0.13	0.08	0.19	0.66	1000000000000
Supercontig_12.1:8475709:8475866:+@Supercontig_12.1:8476154:8477034:+	0.49	0.44	0.53	0.32	0.29	0.36	0.17	1000000000000
Supercontig_12.1:1514873:1516877:-@Supercontig_12.1:1513887:1514791:-	0.5	0.38	0.61	0.95	0.85	1	-0.45	1000000000000
Supercontig_12.1:171442:171670:-@Supercontig_12.1:169835:171365:-	0.1	0.05	0.17	0.36	0.23	0.5	-0.26	428.44
Supercontig_12.1:4402720:4402946:-@Supercontig_12.1:4402395:4402647:-	0.61	0.56	0.66	0.43	0.35	0.5	0.18	301.89
Supercontig_12.1:8475791:8475866:+@Supercontig_12.1:8476154:8477431:+	0.47	0.42	0.51	0.31	0.28	0.35	0.16	5.30565e+10
Supercontig_12.1:8810216:8810514:-@Supercontig_12.1:8809652:8810129:-	1	0.99	1	0.88	0.85	0.92	0.12	1000000000000
Supercontig_12.1:6545790:6545987:+@Supercontig_12.1:6546051:6548172:+	0.41	0.31	0.53	0.21	0.14	0.29	0.2	11.13
Supercontig_12.1:6064330:6064428:+@Supercontig_12.1:6064584:6066002:+	0.13	0.07	0.19	0.02	0	0.04	0.11	72.94
Supercontig_12.1:3025590:3026175:+@Supercontig_12.1:3026273:3027825:+	0.05	0.02	0.09	0.18	0.12	0.26	-0.13	43.21
Supercontig_12.1:3674708:3674910:+@Supercontig_12.1:3675642:3675715:+	0.45	0.43	0.48	0.65	0.62	0.67	-0.2	1000000000000
Supercontig_12.1:4800317:4800669:-@Supercontig_12.1:4798141:4800122:-	0.2	0.16	0.25	0.1	0.08	0.14	0.1	25.06
Supercontig_12.1:3004030:3004540:-@Supercontig_12.1:3002984:3003785:-	0.64	0.6	0.68	0.74	0.71	0.77	-0.1	39.18
Supercontig_12.1:9338769:9338938:+@Supercontig_12.1:9339049:9339157:+	0.37	0.36	0.39	0.27	0.26	0.27	0.1	1000000000000
Supercontig_12.1:1801941:1801973:-@Supercontig_12.1:1800912:1801256:-	0.73	0.72	0.75	0.57	0.56	0.59	0.16	1000000000000
Supercontig_12.1:7300576:7300904:+@Supercontig_12.1:7301012:7301466:+	0.07	0.02	0.15	0.36	0.21	0.54	-0.29	13.08
Supercontig_12.1:455182:455214:+@Supercontig_12.1:455341:456143:+	0.89	0.63	0.99	0.26	0.04	0.67	0.63	16.05
Supercontig_12.1:2920358:2920495:-@Supercontig_12.1:2919734:2920181:-	0.28	0.22	0.35	0.06	0.03	0.09	0.22	1000000000000
Supercontig_12.1:9417124:9417251:+@Supercontig_12.1:9417415:9418224:+	0.07	0.05	0.09	0.18	0.15	0.21	-0.11	6.47808e+09
Supercontig_12.1:6111415:6112204:+@Supercontig_12.1:6112265:6112495:+	0.18	0.13	0.23	0.08	0.06	0.11	0.1	66.35
Supercontig_12.1:7563609:7563776:-@Supercontig_12.1:7563398:7563461:-	0.38	0.36	0.41	0.25	0.22	0.27	0.13	1000000000000
Supercontig_12.1:3638094:3638509:+@Supercontig_12.1:3638855:3640580:+	0.8	0.72	0.87	0.41	0.33	0.5	0.39	1000000000000
Supercontig_12.1:5386025:5386656:-@Supercontig_12.1:5384565:5385959:-	0.15	0.08	0.25	0.55	0.33	0.81	-0.4	155.23
Supercontig_12.1:1023672:1024977:-@Supercontig_12.1:1023462:1023493:-	0.16	0.09	0.25	0.35	0.27	0.44	-0.19	19.18
Supercontig_12.1:9635625:9636246:+@Supercontig_12.1:9636418:9638039:+	0.38	0.31	0.46	0.58	0.49	0.66	-0.2	47.01
Supercontig_12.1:3307626:3307686:-@Supercontig_12.1:3307474:3307569:-	0.3	0.14	0.52	0.84	0.58	0.97	-0.54	64.84
Supercontig_12.1:1062275:1062441:+@Supercontig_12.1:1062496:1062644:+	0.02	0	0.06	0.15	0.07	0.26	-0.13	13.11
Supercontig_12.1:4107436:4107966:+@Supercontig_12.1:4108064:4108145:+	0.07	0	0.18	0.6	0.36	0.82	-0.53	713.58
Supercontig_12.1:6468613:6469993:-@Supercontig_12.1:6467198:6468500:-	0.85	0.64	0.99	0.41	0.29	0.53	0.44	314.02
Supercontig_12.1:3403968:3404406:-@Supercontig_12.1:3402298:3403746:-	0.72	0.66	0.77	0.59	0.54	0.64	0.13	10.93
Supercontig_12.1:7981572:7981684:-@Supercontig_12.1:7978433:7981184:-	0.57	0.54	0.6	0.43	0.4	0.46	0.14	1000000000000
Supercontig_12.1:6040819:6041045:+@Supercontig_12.1:6041261:6042015:+	0.18	0.16	0.21	0.06	0.05	0.07	0.12	1000000000000
Supercontig_12.1:3373724:3374037:-@Supercontig_12.1:3373613:3373644:-	0.23	0.15	0.34	0.09	0.05	0.14	0.14	10.61
Supercontig_12.1:7563308:7563461:+@Supercontig_12.1:7563609:7563776:+	0.4	0.38	0.43	0.27	0.24	0.29	0.13	1000000000000
Supercontig_12.1:9602006:9602291:+@Supercontig_12.1:9602590:9605142:+	0.25	0.19	0.31	0.43	0.36	0.49	-0.18	49.74
Supercontig_12.1:2898545:2899075:+@Supercontig_12.1:2899317:2899582:+	0.36	0.29	0.44	0.16	0.11	0.22	0.2	223.82
Supercontig_12.1:7027224:7027883:+@Supercontig_12.1:7028012:7028233:+	0.35	0.29	0.43	0.53	0.47	0.59	-0.18	30.47
Supercontig_12.1:7154449:7154485:+@Supercontig_12.1:7154538:7155148:+	0.16	0.12	0.2	0.4	0.34	0.47	-0.24	1000000000000
Supercontig_12.1:4946885:4947993:+@Supercontig_12.1:4948045:4949261:+	0.18	0.1	0.3	0.52	0.41	0.62	-0.34	1.38513e+07
Supercontig_12.1:2358820:2359582:+@Supercontig_12.1:2359642:2359757:+	0.84	0.59	1	0.13	0.08	0.19	0.71	1000000000000
Supercontig_12.1:2234693:2234709:-@Supercontig_12.1:2234389:2234594:-	0.35	0.3	0.4	0.53	0.49	0.58	-0.18	2.56508e+10
Supercontig_12.1:110973:111273:+@Supercontig_12.1:111335:112060:+	0.33	0.13	0.58	0.84	0.6	0.97	-0.51	43.78
Supercontig_12.1:6084413:6084644:-@Supercontig_12.1:6083300:6084352:-	0.6	0.53	0.67	0.26	0.16	0.37	0.34	1.65986e+06
Supercontig_12.1:5354946:5354955:-@Supercontig_12.1:5354680:5354775:-	0.39	0.35	0.42	0.18	0.16	0.2	0.21	1000000000000
Supercontig_12.1:2102734:2103162:+@Supercontig_12.1:2103251:2104262:+	0.4	0.35	0.46	0.16	0.12	0.21	0.24	1000000000000
Supercontig_12.1:8650308:8650770:+@Supercontig_12.1:8650857:8650963:+	0.29	0.26	0.32	0.18	0.14	0.22	0.11	472.61
Supercontig_12.1:6851802:6851870:-@Supercontig_12.1:6851544:6851728:-	0.7	0.63	0.77	0.86	0.8	0.91	-0.16	89.29
Supercontig_12.1:8810603:8811072:-@Supercontig_12.1:8810216:8810514:-	0.85	0.8	0.89	0.57	0.5	0.64	0.28	1000000000000
Supercontig_12.1:5412974:5413262:-@Supercontig_12.1:5412656:5412851:-	0.27	0.24	0.3	0.11	0.08	0.15	0.16	1000000000000
Supercontig_12.1:2614347:2615489:+@Supercontig_12.1:2615922:2616149:+	0.43	0.29	0.58	0.14	0.07	0.21	0.29	220.84
Supercontig_12.1:3217321:3217406:-@Supercontig_12.1:3216834:3217251:-	0.12	0.05	0.2	0.46	0.32	0.61	-0.34	1.31458e+06
Supercontig_12.1:8072495:8072725:-@Supercontig_12.1:8070739:8072183:-	0.35	0.32	0.38	0.52	0.48	0.55	-0.17	1000000000000
Supercontig_12.1:3675642:3675715:-@Supercontig_12.1:3675302:3675352:-	0.39	0.36	0.43	0.23	0.2	0.25	0.16	1000000000000
Supercontig_12.1:5176889:5178035:+@Supercontig_12.1:5178099:5178472:+	0.55	0.45	0.65	0.75	0.68	0.81	-0.2	19.5
Supercontig_12.1:3674855:3674910:+@Supercontig_12.1:3675302:3675715:+	0.37	0.34	0.39	0.19	0.18	0.2	0.18	1000000000000
Supercontig_12.1:1044371:1046396:-@Supercontig_12.1:1043585:1044245:-	0.77	0.72	0.82	0.9	0.87	0.93	-0.13	202.11
Supercontig_12.1:8399995:8400566:+@Supercontig_12.1:8400703:8400792:+	0.24	0.13	0.39	0.03	0	0.08	0.21	17.95
Supercontig_12.1:4705473:4706122:-@Supercontig_12.1:4704381:4705381:-	0.06	0.03	0.09	0.16	0.11	0.22	-0.1	15.99
Supercontig_12.5:5468400:5469105:-@Supercontig_12.5:5467674:5468277:-	0.25	0.24	0.25	0.15	0.14	0.15	0.1	1000000000000
Supercontig_12.5:3525663:3526169:+@Supercontig_12.5:3526569:3526847:+	0.57	0.49	0.66	0.34	0.27	0.42	0.23	776.8
Supercontig_12.5:2998944:2999110:-@Supercontig_12.5:2997688:2998880:-	0.16	0.06	0.31	0.84	0.55	0.99	-0.68	2.88868e+10
Supercontig_12.5:4100597:4105024:+@Supercontig_12.5:4105095:4106206:+	0.22	0.16	0.3	0.43	0.35	0.51	-0.21	94.33
Supercontig_12.5:41832:41983:-@Supercontig_12.5:40435:41767:-	0.78	0.73	0.82	0.89	0.87	0.92	-0.11	53201.6
Supercontig_12.5:3023449:3024882:-@Supercontig_12.5:3023232:3023353:-	0.06	0.02	0.12	0.29	0.18	0.41	-0.23	1593.68
Supercontig_12.5:3662529:3663007:+@Supercontig_12.5:3663129:3665379:+	0.26	0.18	0.36	0.52	0.41	0.64	-0.26	23.01
Supercontig_12.5:5615105:5615233:+@Supercontig_12.5:5615314:5615666:+	0.28	0.23	0.34	0.18	0.15	0.22	0.1	10.46
Supercontig_12.5:5514889:5515911:+@Supercontig_12.5:5516392:5517225:+	0.5	0.44	0.57	0.34	0.3	0.38	0.16	931.04
Supercontig_12.5:2356878:2357654:+@Supercontig_12.5:2357712:2358570:+	0.07	0.04	0.11	0.18	0.14	0.23	-0.11	14
Supercontig_12.5:6269270:6270620:+@Supercontig_12.5:6270747:6271485:+	0.55	0.44	0.65	0.25	0.16	0.34	0.3	195.92
Supercontig_12.5:726475:726528:+@Supercontig_12.5:726614:727975:+	0.22	0.12	0.36	0.54	0.4	0.68	-0.32	41.75
Supercontig_12.5:5545251:5548040:-@Supercontig_12.5:5544898:5545172:-	0.21	0.03	0.5	0.85	0.58	0.99	-0.64	342510
Supercontig_12.5:173969:174886:+@Supercontig_12.5:174950:175420:+	0.08	0.06	0.1	0.19	0.15	0.23	-0.11	2.36714e+07
Supercontig_12.5:2099519:2099790:-@Supercontig_12.5:2098382:2099326:-	0.09	0.05	0.15	0.26	0.18	0.35	-0.17	25.33
Supercontig_12.5:5121195:5121283:-@Supercontig_12.5:5121086:5121114:-	0.09	0.03	0.16	0.32	0.24	0.4	-0.23	854.46
Supercontig_12.5:5367239:5367696:-@Supercontig_12.5:5365898:5367172:-	0.17	0.14	0.21	0.06	0.04	0.09	0.11	1886.61
Supercontig_12.5:3901138:3901949:-@Supercontig_12.5:3899073:3901053:-	0.99	0.95	1	0.89	0.82	0.94	0.1	19.78
Supercontig_12.5:4911766:4911781:+@Supercontig_12.5:4911963:4912088:+	0.57	0.54	0.59	0.12	0.11	0.13	0.45	1000000000000
Supercontig_12.5:1911314:1911326:+@Supercontig_12.5:1911384:1911517:+	0.02	0	0.08	0.3	0.17	0.44	-0.28	6.60675e+06
Supercontig_12.5:3230443:3231737:+@Supercontig_12.5:3231816:3234936:+	0.34	0.23	0.46	0.13	0.08	0.19	0.21	49.08
Supercontig_12.5:1969741:1970413:+@Supercontig_12.5:1970813:1971722:+	0.43	0.4	0.46	0.27	0.24	0.31	0.16	1000000000000
Supercontig_12.5:4733406:4733639:-@Supercontig_12.5:4733132:4733277:-	0.18	0.12	0.26	0.03	0.01	0.07	0.15	1493.38
Supercontig_12.5:5088549:5088780:+@Supercontig_12.5:5088850:5089247:+	0.45	0.44	0.47	0.55	0.54	0.56	-0.1	1000000000000
Supercontig_12.5:3646340:3646656:-@Supercontig_12.5:3645884:3646179:-	0.18	0.14	0.23	0.08	0.05	0.11	0.1	9449.51
Supercontig_12.5:1366380:1366757:-@Supercontig_12.5:1365765:1365906:-	0.44	0.42	0.46	0.57	0.55	0.58	-0.13	1000000000000
Supercontig_12.5:26033:26118:-@Supercontig_12.5:25928:25969:-	0.55	0.3	0.76	0.14	0.04	0.31	0.41	11.35
Supercontig_12.5:4652580:4653590:-@Supercontig_12.5:4651975:4652520:-	0.85	0.75	0.93	0.98	0.94	1	-0.13	43.66
Supercontig_12.5:2569024:2569187:+@Supercontig_12.5:2569380:2570896:+	0.43	0.37	0.5	0.63	0.56	0.71	-0.2	46.36
Supercontig_12.5:3786269:3786697:+@Supercontig_12.5:3786819:3786974:+	0.53	0.35	0.72	0.96	0.88	0.99	-0.43	5.78624e+07
Supercontig_12.5:174109:174886:+@Supercontig_12.5:174950:175420:+	0.08	0.07	0.1	0.19	0.15	0.23	-0.11	1000000000000
Supercontig_12.5:3932978:3933070:+@Supercontig_12.5:3933134:3933513:+	0.96	0.87	1	0.73	0.64	0.81	0.23	50.42
Supercontig_12.5:2899120:2899441:+@Supercontig_12.5:2899527:2899669:+	0.34	0.19	0.52	0.74	0.54	0.92	-0.4	30.77
Supercontig_12.5:5121195:5121400:-@Supercontig_12.5:5121086:5121114:-	0.04	0.01	0.07	0.15	0.11	0.2	-0.11	14.63
Supercontig_12.5:1553085:1553345:+@Supercontig_12.5:1553555:1554367:+	0.39	0.37	0.41	0.52	0.5	0.54	-0.13	1000000000000
Supercontig_12.5:1969741:1970413:+@Supercontig_12.5:1970844:1971722:+	0.42	0.39	0.45	0.26	0.22	0.29	0.16	1000000000000
Supercontig_12.5:4713085:4713246:-@Supercontig_12.5:4712451:4712781:-	0.2	0.17	0.23	0.33	0.31	0.36	-0.13	1000000000000
Supercontig_12.5:5133223:5133901:+@Supercontig_12.5:5134187:5134325:+	0.63	0.6	0.66	0.76	0.73	0.79	-0.13	1000000000000
Supercontig_12.5:4070514:4070724:-@Supercontig_12.5:4069750:4070352:-	0.14	0.08	0.21	0.02	0	0.06	0.12	33.56
Supercontig_12.5:172745:173969:+@Supercontig_12.5:174109:174886:+	0.83	0.81	0.84	0.66	0.63	0.69	0.17	1000000000000
Supercontig_12.5:4317419:4317521:-@Supercontig_12.5:4317291:4317347:-	0.37	0.33	0.4	0.48	0.45	0.52	-0.11	3313.88
Supercontig_12.5:2268565:2268732:+@Supercontig_12.5:2269181:2269602:+	0.25	0.2	0.3	0.68	0.53	0.82	-0.43	7.75538e+10
Supercontig_12.5:4332994:4333019:+@Supercontig_12.5:4333091:4333186:+	0.2	0.15	0.25	0.05	0.03	0.07	0.15	9.7292e+11
Supercontig_12.5:2831786:2832346:-@Supercontig_12.5:2830979:2831716:-	0.2	0.14	0.28	0.05	0.02	0.1	0.15	57.05
Supercontig_12.5:220460:220588:+@Supercontig_12.5:220716:220774:+	0.9	0.9	0.9	0.76	0.75	0.77	0.14	1000000000000
Supercontig_12.5:4278752:4278854:+@Supercontig_12.5:4278973:4279099:+	0.82	0.79	0.85	0.72	0.69	0.75	0.1	2.63773e+09
Supercontig_12.5:4003177:4003430:-@Supercontig_12.5:4002179:4003111:-	0.15	0.08	0.25	0.01	0	0.05	0.14	16.77
Supercontig_12.5:69899:70395:+@Supercontig_12.5:70513:71883:+	0.81	0.62	0.94	0.46	0.31	0.63	0.35	16.57
Supercontig_12.5:2268565:2268732:+@Supercontig_12.5:2269181:2269874:+	0.27	0.21	0.33	0.75	0.59	0.89	-0.48	1000000000000
Supercontig_12.5:4098470:4098751:+@Supercontig_12.5:4098894:4099094:+	0.17	0.15	0.19	0.33	0.29	0.37	-0.16	1000000000000
Supercontig_12.5:4713085:4713166:-@Supercontig_12.5:4712451:4712781:-	0.19	0.16	0.21	0.31	0.29	0.34	-0.12	1000000000000
Supercontig_12.5:4708757:4709289:-@Supercontig_12.5:4707773:4708583:-	0.25	0.21	0.31	0.43	0.37	0.49	-0.18	226.11
Supercontig_12.5:2269181:2269631:-@Supercontig_12.5:2268565:2268732:-	0.25	0.2	0.31	0.7	0.55	0.85	-0.45	1.52477e+11
Supercontig_12.5:1911077:1911326:+@Supercontig_12.5:1911384:1911517:+	0.05	0.02	0.09	0.23	0.15	0.3	-0.18	645.2
Supercontig_12.5:4139907:4140738:-@Supercontig_12.5:4139490:4139789:-	0.77	0.51	0.97	0.14	0.06	0.24	0.63	365660
Supercontig_12.5:3684776:3684788:+@Supercontig_12.5:3684922:3685051:+	0.2	0.18	0.23	0.04	0.03	0.05	0.16	1000000000000
